# Supplementary material for: Hospital bed occupancy rate is an independent risk factor for COVID-19 inpatient mortality: a pandemic epicentre cohort study
Source: PubMed Central journal article supplement — BMJ Open. 2022 Feb 15;12(2):e058171. doi: 10.1136/bmjopen-2021-058171 (PMC8852235; doi:10.1136/bmjopen-2021-058171), 2022-02-15
Supplement: bmjopen-2021-058171.draft_revisions.pdf [file bmjopen-2021-058171.draft_revisions.pdf]

# BMJ Open

BMJ Open is committed to open peer review. As part of this commitment we make the peer review history of every article we publish publicly available.

When an article is published we post the peer reviewers' comments and the authors' responses online. We also post the versions of the paper that were used during peer review. These are the versions that the peer review comments apply to.

The versions of the paper that follow are the versions that were submitted during the peer review process. They are not the versions of record or the final published versions. They should not be cited or distributed as the published version of this manuscript.

BMJ Open is an open access journal and the full, final, typeset and author-corrected version of record of the manuscript is available on our site with no access controls, subscription charges or pay-per-view fees (<http://bmjopen.bmj.com>).

If you have any questions on BMJ Open's open peer review process please email [info.bmjopen@bmj.com](mailto:info.bmjopen@bmj.com)

# BMJ Open

## Decreasing COVID-19 In-Hospital Mortality – Lessons from the Pandemic

|                               |                                                                                                                                                                                                                                                                                                                                                                                                                                                                                                                                                                                                                                |
|-------------------------------|--------------------------------------------------------------------------------------------------------------------------------------------------------------------------------------------------------------------------------------------------------------------------------------------------------------------------------------------------------------------------------------------------------------------------------------------------------------------------------------------------------------------------------------------------------------------------------------------------------------------------------|
| Journal:                      | <i>BMJ Open</i>                                                                                                                                                                                                                                                                                                                                                                                                                                                                                                                                                                                                                |
| Manuscript ID                 | bmjopen-2021-058171                                                                                                                                                                                                                                                                                                                                                                                                                                                                                                                                                                                                            |
| Article Type:                 | Original research                                                                                                                                                                                                                                                                                                                                                                                                                                                                                                                                                                                                              |
| Date Submitted by the Author: | 09-Oct-2021                                                                                                                                                                                                                                                                                                                                                                                                                                                                                                                                                                                                                    |
| Complete List of Authors:     | Castagna, Francesco; Montefiore Medical Center, Xue, Xiaonan; Albert Einstein College of Medicine, Department of Epidemiology and Population Health<br>Saeed, O; Albert Einstein College of Medicine<br>Kataria, Rachna ; Albert Einstein College of Medicine<br>Puius, Yoram; Albert Einstein College of Medicine<br>Patel, Snehal; Albert Einstein College of Medicine<br>Garcia, Mario; Albert Einstein College of Medicine<br>Racine, Andrew D. ; Albert Einstein College of Medicine, Department of Pediatrics<br>Sims, Daniel; Albert Einstein College of Medicine<br>Jorde, Ulrich; Albert Einstein College of Medicine |
| Keywords:                     | COVID-19, Public health < INFECTIOUS DISEASES, EPIDEMIOLOGY                                                                                                                                                                                                                                                                                                                                                                                                                                                                                                                                                                    |
|                               |                                                                                                                                                                                                                                                                                                                                                                                                                                                                                                                                                                                                                                |

SCHOLARONE™  
Manuscripts

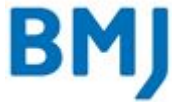

I, the Submitting Author has the right to grant and does grant on behalf of all authors of the Work (as defined in the below author licence), an exclusive licence and/or a non-exclusive licence for contributions from authors who are: i) UK Crown employees; ii) where BMJ has agreed a CC-BY licence shall apply, and/or iii) in accordance with the terms applicable for US Federal Government officers or employees acting as part of their official duties; on a worldwide, perpetual, irrevocable, royalty-free basis to BMJ Publishing Group Ltd ("BMJ") its licensees and where the relevant Journal is co-owned by BMJ to the co-owners of the Journal, to publish the Work in this journal and any other BMJ products and to exploit all rights, as set out in our [licence](#).

The Submitting Author accepts and understands that any supply made under these terms is made by BMJ to the Submitting Author unless you are acting as an employee on behalf of your employer or a postgraduate student of an affiliated institution which is paying any applicable article publishing charge ("APC") for Open Access articles. Where the Submitting Author wishes to make the Work available on an Open Access basis (and intends to pay the relevant APC), the terms of reuse of such Open Access shall be governed by a Creative Commons licence – details of these licences and which [Creative Commons](#) licence will apply to this Work are set out in our licence referred to above.

Other than as permitted in any relevant BMJ Author's Self Archiving Policies, I confirm this Work has not been accepted for publication elsewhere, is not being considered for publication elsewhere and does not duplicate material already published. I confirm all authors consent to publication of this Work and authorise the granting of this licence.

# Decreasing COVID-19 In-Hospital Mortality – Lessons from the Pandemic

Francesco Castagna MD<sup>1</sup>, Xiaonan Xue PhD<sup>2</sup>, Omar Saeed MD<sup>1</sup>, Rachna Kataria MD<sup>1</sup>, Yoram A Puius MD PhD<sup>3</sup>, Snehal R Patel MD<sup>1</sup>, Mario J Garcia MD<sup>1</sup>, Andrew D Racine MD<sup>4</sup>, Daniel B Sims MD<sup>1</sup>, Ulrich P Jorde MD<sup>1</sup>

## Affiliations:

<sup>1</sup> Division of Cardiology, Montefiore Medical Center and Albert Einstein College of Medicine, Bronx, NY

<sup>2</sup> Department of Epidemiology and Population Health, Albert Einstein College of Medicine, Bronx, NY

<sup>3</sup> Division of Infectious Diseases, Montefiore Medical Center and Albert Einstein College of Medicine, Bronx, NY

<sup>4</sup> Department of Pediatrics, Montefiore Medical Center and Albert Einstein College of Medicine, Bronx, New York.

Word count: 2,708

## Corresponding Author:

Ulrich P. Jorde, MD  
Professor of Medicine

Division of Cardiology  
Department of Medicine  
Montefiore Medical Center  
3400 Bainbridge Ave. 7<sup>th</sup> floor  
Bronx, NY  
Email: [ujorde@montefiore.org](mailto:ujorde@montefiore.org)

## Abstract

**Introduction:** COVID-19 first struck New York City in the spring of 2020 resulting in an unprecedented strain on our health care system triggering multiple changes in public health policy governing hospital operations as well as therapeutic approaches to COVID-19. We examined inpatient mortality at our center throughout the course of the pandemic.

**Methods:** Retrospective chart review of clinical characteristics, treatments, and outcome data of all patients admitted with COVID-19 from March 1<sup>st</sup>, 2020 to February 28<sup>th</sup>, 2021. Patients were grouped into three-month quartiles. Hospital strain was assessed as percent of occupied beds based on a normal bed capacity of 1,491.

**Results:** Inpatient mortality decreased from 25.0% in spring to 10.8% over the course of the year. During this time, the use of remdesivir, steroids, and anticoagulants increased; the use of hydroxychloroquine and other antibiotics decreased. Daily bed occupation ranged from 62% to 118% and COVID-19 mortality increased by 0.7% per 1% increase in bed occupation (HR 1.007, CI: 1.001, 1.013,  $p=0.004$ ). In a multivariate model with demographics, comorbidities, acuity of illness, and bed occupation inpatient mortality during the second surge remained significantly lower than during the initial surge (HR 0.520, CI 0.448-0.604,  $p<0.001$ ). Propensity score analysis confirmed this finding (HR 0.580 CI: 0.507-0.663,  $p<0.001$ ).

**Conclusion:** Inpatient mortality from COVID-19 decreased to a degree disproportionate to advances in disease specific therapeutics and was associated with bed occupation. Early reduction in epicenter hospital bed occupation to accommodate acutely ill and resource-intensive patients should be a critical component in the strategic planning for future pandemics.

### Strengths and limitations of this study

- Large cohort study (7,390 COVID-19 patients).
- Longitudinal analysis over 1 year of management and hospital policy changes.
- Analysis of mortality changes after adjustment for different therapies and clinical parameters.
- Identification of the association between level of hospital system stress and mortality, with important public health ramifications.
- Limitation: data on most recent variants are not included

1  
2  
3 **Key questions:**  
4

5  
6 **What is already known?** COVID-19 treatment and mortality changed over one year. Was the  
7  
8 percentage of hospital bed occupation associated with in-patient mortality?  
9

10  
11 **What are the new findings?** In this retrospective cohort study of 7,390 COVID-19 patients  
12  
13 admitted to our institution over a 12-month period, we found that inpatient mortality due to  
14  
15 COVID-19 decreased to a degree disproportionate to advances in disease specific therapies.  
16  
17 Additionally, inpatient mortality due to COVID-19 was associated with the percentage of  
18  
19 hospital bed occupation.  
20  
21

22  
23 **What do the new findings imply?** We provide important insights into the temporal changes in  
24  
25 COVID-19 prognosis and for the first time identify hospital stress – measured as the percentage  
26  
27 of bed occupation – as a parameter independently associated with COVID-19 mortality. Early  
28  
29 reductions in epicenter hospital bed occupation to accommodate acutely ill and resource-  
30  
31 intensive patients should be critical considerations in the strategic planning for future pandemics.  
32  
33  
34  
35  
36  
37  
38  
39  
40  
41  
42  
43  
44  
45  
46  
47  
48  
49  
50  
51  
52  
53  
54  
55  
56  
57  
58  
59  
60

## INTRODUCTION

Coronavirus disease 2019 (COVID-19) was declared a global pandemic by the World Health Organization on March 11<sup>th</sup>, 2020.<sup>1</sup> In the United States, after a cluster of cases reported from Washington state<sup>2</sup>, New York state quickly became the initial epicenter of this pandemic with over 1.27 million of cases till date and over 50,000 fatalities with the highest concentration in the Bronx and Queens boroughs of New York City.<sup>3</sup> Montefiore Einstein, with its three principal teaching hospitals and combined adult bed capacity of 1,491, is the primary health care provider for the large, nearly 1.5 million diverse population of the Bronx<sup>4</sup> and experienced a “first wave” of COVID-19 admissions in the spring of 2020<sup>3</sup>, followed by a significant reduction of cases until a second surge in hospitalizations was noted in the winter of 2020. Throughout the course of the year, multiple public health measures - including those adapting hospital operation to a disaster level pandemic, such as cancellation of all elective procedures and waiver of state specific licensing for health care providers - were put in place. In addition, the understanding of COVID-19 pathophysiology improved<sup>5,6</sup>, new treatments were developed<sup>7-10</sup>, parts of the general population<sup>11,12</sup> as well as hospital personnel developed antibodies after COVID-19 illness<sup>13</sup>, and our hospital system adapted to and then recovered from crisis mode.<sup>14</sup> Here, we report outcomes of patients hospitalized with COVID-19 through one year since the first case, focusing on the differences observed between the spring and the winter surges.

## METHODS:

### Study Population

We retrospectively reviewed all adult patients admitted to Montefiore Medical Center with a real time reverse transcription polymerase chain reaction (RT-PCR) assay positive for COVID-19



1  
2  
3 between March 1, 2020 and February 28, 2021. We divided this timeframe in four 3-month  
4  
5 seasons: spring (March 1, 2020 to May 31, 2020), summer (June 1, 2020 to August 30, 2020),  
6  
7 fall (September 1, 2020 to November 30, 2020), and winter (December 1, 2020 to February 28,  
8  
9 2021).  
10  
11  
12  
13

### 14 **Data Collection**

15  
16  
17 Medical data including demographic, clinical, and laboratory variables were extracted from the  
18  
19 electronic medical record system. The primary outcome was 30-day in-hospital mortality.  
20  
21  
22  
23

### 24 **Statistical Analysis**

25  
26 Continuous variables are displayed as mean  $\pm$  standard deviation or median [25-75%  
27  
28 interquartile range] and compared with the Student's t-test, or Wilcoxon ranks-sum, as  
29  
30 appropriate. Categorical data are presented as percent and compared by the chi-squared test. We  
31  
32 estimated the cumulative incidence of the primary endpoint in-hospital mortality for each season,  
33  
34 treating hospital discharge as a competing event.<sup>15</sup> To avoid any bias due to differential follow-  
35  
36 up length, we censored the follow-up time at 30 days after the admission.  
37  
38  
39

40 A multivariable competing risk proportional hazard models was used to estimate the sub-  
41  
42 distribution hazard ratios<sup>16 17</sup> for time to in-hospital death. Selection method for covariates is  
43  
44 presented in the Supplemental Material.  
45  
46

47 Then we focused on examining the difference in in-hospital death between patients admitted in  
48  
49 the spring and in the winter, as they represented the two largest and most temporal distant waves  
50  
51 of the COVID-19 pandemic occurring before and after pandemic specific therapeutic hospital  
52  
53  
54  
55  
56  
57  
58  
59  
60

1  
2  
3 logistic changes had been implemented. Selection method for covariates is presented in the  
4  
5 Supplemental Material.  
6

7  
8 The proportionality assumption was examined<sup>18</sup> and no violation was identified. A two-sided  
9  
10  $p < 0.05$  was considered statistically significant.  
11  
12  
13

### 14 15 **Propensity Score Analysis**

16  
17 To fully control the potential differences in patient population and hospital stress between spring  
18  
19 and winter COVID-19 patients, we also used propensity score (PS) matching to compare the 30-  
20  
21 day in-hospital mortality between spring and winter admissions. The same covariates used for  
22  
23 the multivariable competing risk regression were used for PS matching. PS matching was carried  
24  
25 out through a 1:1 greedy matching algorithm, with a caliper width of 0.1 SD. We then stratified  
26  
27 on matched pair in the competing risk regression model.<sup>19 20</sup> Because one-to-one matching led to  
28  
29 a reduction in sample size, we used this analysis as a sensitivity analysis.  
30  
31

32  
33 All statistical analyses was performed with SPSS (IBM Corp, ver. 25, Armonk, NY) and the R  
34  
35 packages cmprsk and crrSC (R Foundation for Statistical Computing, ver 3.5)  
36  
37  
38  
39

### 40 41 **Patient and Public Involvement**

42  
43 Given the retrospective nature of our analysis, it was not appropriate or possible to involve  
44  
45 patients or the public in the design, or conduct, or reporting, or dissemination plans of our  
46  
47 research.  
48  
49  
50

## 51 52 **RESULTS**

53  
54  
55  
56  
57  
58  
59  
60

1  
2  
3 7,390 COVID-19 positive adult patients were admitted between March 1, 2020 and February 28,  
4 2021 (**Figure 1**). 4,495 patients were admitted during the spring, 264 during the summer, 377  
5  
6 during the fall, and 2,254 during the winter.  
7  
8

9  
10 On April 8, 2020, peak of the spring season, the total numbers of simultaneously adult patients  
11 admitted to our hospital (including those admitted to emergency adult wards at our children's  
12 hospital<sup>21</sup>) was 1,762 (118% of nominal bed capacity); 1,201 of them (68.2%) were COVID-19  
13  
14 patients. On February 8, 2021, peak of winter season, 1,512 patients (101% of nominal bed  
15  
16 capacity) were admitted to our hospital and 393 of them (26.0%) were COVID-19 patients.  
17  
18

19  
20 (**Figure 1**). Following cancellation of elective procedures, bed occupation decreased to 70% by  
21  
22 the end of the spring season and remained at 90% until the beginning of the winter season, when  
23  
24 the second wave occurred in December 2020. Unadjusted mortality for patient admitted at the  
25  
26 beginning of spring, end of spring, beginning of winter, and end of winter was 28%, 8%, 14%,  
27  
28 and 13%, respectively (**Figure 2**).  
29  
30  
31  
32  
33  
34

### 35 **Patient Population**

36  
37 Demographics, past medical history, vital signs at arrivals, and initial laboratory blood tests are  
38 presented in **Table 1**. Overall, median age was 66 (55 – 77) years, 3,835 (51.9%) patients were  
39  
40 male, 5,519 (74.2%) were of Black race and/or Hispanic ethnicity. Median age ranged from 63  
41  
42 years (fall) to 67 years (spring). Sex distribution was similar throughout the year. Summer and  
43  
44 fall patients had the lowest and the highest BMI: 26.7 and 28.6 kg/m<sup>2</sup>, respectively.  
45  
46  
47  
48  
49  
50

### 51 **Pharmacotherapy**

52  
53 Changes in pharmacological approach is presented in **Supplemental Table 1** and **Figure 3**  
54  
55  
56  
57  
58  
59  
60

1  
2  
3 Spring patients were more likely to receive hydroxychloroquine, azithromycin and other  
4 antibiotics. The use of Remdesivir substantially increased throughout the year (from less than 2%  
5 during spring to almost 70% by the end of the winter). Steroids prescription (from 33% during  
6 spring to almost 70% in February 2021), therapeutic anticoagulation therapy, as well as use of  
7  
8  
9  
10  
11  
12  
13  
14  
15  
16  
17  
18  
19  
20  
21  
22  
23  
24  
25  
26  
27  
28  
29  
30  
31  
32  
33  
34  
35  
36  
37  
38  
39  
40  
41  
42  
43  
44  
45  
46  
47  
48  
49  
50  
51  
52  
53  
54  
55  
56  
57  
58  
59  
60

Spring patients were more likely to receive hydroxychloroquine, azithromycin and other antibiotics. The use of Remdesivir substantially increased throughout the year (from less than 2% during spring to almost 70% by the end of the winter). Steroids prescription (from 33% during spring to almost 70% in February 2021), therapeutic anticoagulation therapy, as well as use of statins, angiotensin converting inhibitors (ACE-I), or angiotensin receptor blockers (ARBs) also increased.

### Death, Intubation, and Length of Stay

Over the course of a year, 1,437 (19.4%) died while hospitalized. Patients who died were older, had more comorbidities, and were more acutely ill consistent within prior reports on risk factors for death in COVID-19<sup>5 6</sup> (**Supplemental Table 2**). Average unadjusted monthly mortality is presented in **Figure 2**. 30-day in-hospital mortality (**Figure 4A**) was 25.0% for the spring patients, 11.0% for summer patients, 6.9% for fall patients, and 11.4% for winter patients ( $p < 0.001$ ). On average, spring patients died 6.4 (3.2 – 12.9) days after the arrival to the emergency department, summer patients 7.2 (3.0 – 15.7) days after the arrival, fall patients 13.4 (8.7 – 21.6) days after arrival, and winter patients 13.3 (6.8 – 20.7) days after the arrival ( $p < 0.001$ ). Frequency of invasive ventilatory support was higher during the spring with 892 patients (19.4%) intubated, versus 27 (10.2%) in the summer, 36 (9.5%) during fall, and 268 (11.9%) in the winter,  $p < 0.001$ . Median time from arrival-to-intubation was 0.7 (0.1 - 4.1) days for spring patients, 0.6 (0.1 - 8.1) days for summer patients, 2.2 (0.1 – 7.3) days for fall patients, and 2.8 (0.3 – 7.0) days for winter patients,  $p < 0.001$ . Median length of stay was 6.1 (3.5 – 11.1) days during spring, 5.1 (2.7 – 10.1) days during summer, 5.0 (3.0 – 10.1) days during fall, and 6.3 (3.8 – 12.0) days during winter,  $p < 0.001$ .

### **Bed Saturation and Mortality**

In the multivariable competing risk proportional hazard model of the entire cohort, percent of bed occupation was associated with increased 30-day in-hospital mortality (HR 1.007, CI: 1.001, 1.013,  $p=0.004$ ); i.e mortality increase by 0.7 % for each 1% increase of bed occupation.

### **Spring vs Winter Mortality Comparison and Propensity Matched Analysis**

In the multivariable competing risk proportional hazard model comparing spring and winter season, 30-day in-hospital mortality was lower in winter (HR 0.520, CI 0.448-0.604,  $p<0.001$ ) when compared to spring. After PS caliper matching, there were 1,722 matched pairs. Spring and winter patients had similar distribution of PS (**Supplemental Figure 1**) and standardized average difference among covariates was greatly reduced. PS analysis showed a significant reduction of in-hospital mortality during winter (HR 0.580 CI: 0.507-0.663,  $p<0.001$ ) confirming what we observed in the multivariable adjusted analysis (**Figure 4B**).

### **DISCUSSION**

We examined inpatient mortality from COVID-19 over the course of a one-year pandemic at our hospital system in New York City. Our principal findings are as follows: First, we observed a substantial reduction of in-house mortality coinciding with multiple pandemic related public health measures focusing on hospital resources on COVID-19 – and preceding comprehensive changes in pharmacotherapy - towards the end of the first surge. Second, we describe - for the first time - hospital bed occupation as an independent risk factor for inpatient mortality from COVID-19.

## Public Health Measures in Response to COVID-19

After declaring a state of disaster emergency (March 7, 2020), New York State introduced different measures to limit the spread of the disease, including public schools closure (March 16, 2020), limitation of indoor dining (March 17, 2020), stay-home order for non-essential workers (March 22, 2020), mandatory face coverings in public (April 15, 2020), and night subway closure (April 30, 2020)<sup>22</sup>. Despite these measures to limit the diffusion of the disease and a generalized reduction of movements around New York City (as evidenced by a more than 90% reduction of subway ridership compared to 2019)<sup>23</sup>, more than 30% of Bronx residents were found to have positive antibodies (and thus possibly temporary immunity) against SARS-CoV-2 in August 2020.<sup>24</sup>

Specifically relevant to hospital operations, executive order no. 202.5 (March 16, 2020)<sup>25</sup> allowed healthcare providers not licensed or registered in New York State to temporarily work in the State, and executive order no. 202.10 (March 22, 2020)<sup>25</sup> suspended elective operations. These executive orders were associated with a dramatic drop in non-COVID-19 admissions at our institution beginning March 16, 2020. (**Figure 1**). On March 26, 2020 New York State Governor Cuomo additionally mandated all hospitals to increase their bed capacity by 50% to accommodate the surge of COVID-19 patients.<sup>25</sup> Despite this order, the actual bed occupation at our institution (while accommodating all COVID-19 patients presenting to our hospitals) remained below the usual operating capacity until December 2020.

Notably, COVID-19 mortality remained stable throughout the summer and fall 2020 with low case counts and increased utilization of steroids, anticoagulation, and remdesivir. Although randomized controlled trials have shown morbidity benefits with the use of remdesivir<sup>7</sup> and

1  
2  
3 mortality reduction with steroids<sup>8</sup>, the magnitude of these effects cannot explain the more than  
4  
5 50% reduction in mortality we observed. Furthermore, pharmacotherapy, with the exception of  
6  
7 hydroxychloroquine elimination, did not materially change within the spring season, by the end  
8  
9 of which mortality was already decreased. Steroid, remdesivir, and therapeutic anticoagulation  
10  
11 were used in 10-20% of patients by May 2020, but they reached 30-70% only in the winter  
12  
13 season. Despite that, unadjusted mortality began to increase again in December 2020 during the  
14  
15 second wave. Of note, bed occupation also increased at that time and proved to be an  
16  
17 independent risk factor for COVID-19 mortality in our cohort of nearly 8,000 patients.  
18  
19  
20  
21  
22  
23

### 24 **Change in Therapeutic Approach**

25  
26 The initial widespread (>2/3 of first spring patients) use of hydroxychloroquine, an agent  
27  
28 eventually proven to be ineffective<sup>26</sup> to treat COVID-19, probably represents the most obvious  
29  
30 pandemic-associated deviation from the usual multiphase clinical trial standards of therapeutic  
31  
32 paradigm development. Only 8 of 2,254 patients received hydroxychloroquine during the winter  
33  
34 wave. To a similar extent, we observed a reduction in the use of azithromycin and other  
35  
36 antibiotics, the latter possibly reflecting a more careful assessment of the need to treat  
37  
38 superimposed bacterial infections during the second wave. Steroid therapy<sup>8,27</sup> and therapeutic  
39  
40 anticoagulation<sup>9</sup> were implemented in the majority of patients during the winter after the  
41  
42 knowledge on the likely disease modulating inflammatory proprieties and pro-thrombotic effect  
43  
44 of COVID-19 had been recognized<sup>28</sup> and, in the case of steroids, a therapeutic effect had been  
45  
46 proven<sup>8</sup>. Remdesivir, an inhibitor of the viral RNA-dependent RNA polymerase that showed  
47  
48 shortening of recovery time in hospitalized patients with COVID-19<sup>7</sup>, received emergency FDA  
49  
50 approval on October 22<sup>nd</sup>,2020<sup>29</sup> and was administered to almost half of the admitted patients  
51  
52  
53  
54  
55  
56  
57  
58  
59  
60

1  
2  
3 during the winter. If initial concerns of possible interactions between ACE-I or ARBs and  
4 SARS-CoV-2<sup>30</sup> led to a possible underutilization or discontinuation of these drugs during the  
5  
6 spring, we observed a significant increase in their use during the following months, after no  
7  
8 increased risks were reported.<sup>31 32</sup>  
9  
10

11 Similarly, after several reports showed a possible protective effect associated with the use of  
12  
13 statins<sup>33 34</sup>, their utilization markedly increased during the winter.  
14  
15

16  
17 Lastly, after the spring wave provided anecdotal evidence for early proning in COVID-19  
18  
19 pneumonia, an approach strongly favoring noninvasive ventilation and avoiding intubation was  
20  
21 developed to address respiratory distress in COVID-19; more data about such an approach has  
22  
23 since accumulated.<sup>10 35</sup>  
24  
25  
26  
27

### 28 **Change in Hospital Stress Load**

29  
30 At the peak of the pandemic, the hospital saturation reached the 118% of the nominal bed  
31  
32 capacity and COVID-19 patients accounted for 68.2% of all admitted patients. This increase in  
33  
34 acutely ill patients created significant excess demand on the rest of the hospital infrastructure  
35  
36 best characterized by the surge in the need for intensive care unit (ICU) beds and transformation  
37  
38 of other hospital areas to ICUs.<sup>14 21</sup> Despite increased patient load, the number of standard ICU  
39  
40 beds, as well as laboratories, diagnostic equipment, and available personnel, remained the same  
41  
42 as before the pandemic. This unmatched patient overload resulted in a 0.7 % mortality increase  
43  
44 for each 1% increment in hospital bed saturation.  
45  
46  
47  
48  
49  
50

### 51 **Limitations**

52  
53  
54  
55  
56  
57  
58  
59  
60



1  
2  
3 Our study has the shortcomings of a retrospective investigation, but there are some very specific  
4 aspects limiting the interpretation of our results. First, it is difficult to assess the true effects of  
5 pharmacotherapy given the dynamic changes in indications, doses, and usage that happened over  
6 the course of the year. Regardless, we believe the propensity-matched comparison between the  
7 spring and the winter waves provides compelling evidence for the validity of our principal  
8 observation of inpatient COVID-19 mortality reduction disproportionate to advances in  
9 pharmacotherapy. We chose total bed occupation as a metric for hospital stress assuming that  
10 other resources per bed remained static. Notably, the ratio of COVID-19 to non-COVID-19  
11 patients, ICU bed saturation, and staff shortages are unaccounted for in this model. Regrettably,  
12 an in-depth analysis of these metrics is beyond our ability in this retrospective pandemic analysis  
13 with disaster elements. Additionally, a significant number of patients received ICU-level-of-care  
14 interventions (mechanical ventilatory support, dialysis, vasopressors titration) on regular floors;  
15 therefore, the concept of ICU bed saturation might have been not truly representative of the  
16 burden.

17  
18 However, we feel our data is sufficiently strong to support the notion that bed capacity expansion  
19 alone is not the answer. Rather, a smaller number of beds with higher staffing accomplished by  
20 drastic reductions in all non-emergent procedures and activities is likely a better approach.

21  
22 Although offering fewer beds in pandemic situation appears initially quite counterintuitive, in  
23 practice we observed that mortality began to decrease once beds and resources were allocated  
24 specifically to COVID-19 patients by executive orders 202.5 and 202.10; and most importantly  
25 that bed occupation never exceeded 100% once hospital operations focused on the COVID-19  
26 pandemic only. Lastly, it is conceivable that an uptrend in mortality observed late in the  
27 pandemic with established treatment paradigms could be due to new viral strains or a sicker

1  
2  
3 patient population. Although we are unable to provide detailed strain analysis for our study  
4  
5 population, a meaningful numbers of new (and possibly more virulent) strains were not yet  
6  
7 observed in in the Bronx, where our study was conducted.<sup>36</sup> The small sample size of patients in  
8  
9 summer and fall does not allow meaningful propensity matched comparisons, and when  
10  
11 comparing summer, fall, and winter populations, there do not appear to be clinically meaningful  
12  
13 differences.  
14  
15

## 16 17 18 19 **CONCLUSIONS**

20  
21 Inpatient mortality from COVID-19 decreased to a degree disproportionate to advances in  
22  
23 disease specific therapeutics and was associated with bed occupation. Early reduction in  
24  
25 epicenter hospital bed occupation to accommodate acutely ill and resource-intensive patients  
26  
27 should be a critical component in the strategic planning for future pandemics.  
28  
29  
30  
31  
32  
33  
34  
35  
36  
37  
38  
39  
40  
41  
42  
43  
44  
45  
46  
47  
48  
49  
50  
51  
52  
53  
54  
55  
56  
57  
58  
59  
60

## DECLARATIONS

### Ethics approval and consent to participate

The Office of Human Research Affairs at Albert Einstein College of Medicine approved this study (# 2020-11308). Patient consent and HIPAA forms were waived by our IRB due to the retrospective nature of our research.

### Consent for publication

Non applicable.

### Availability of data and materials

The datasets used and/or analyzed during the current study are available from the corresponding author on reasonable request.

### Competing interests

No conflicts of interest exist.

### Funding/Support

Francesco Castagna is supported by a grant by the National Center for Advancing Translational Science (NCATS) Clinical and Translational Science Award at Einstein-Montefiore (UL1TR001073). Omar Saeed is supported by grants from the National Institute for Health/National Heart, Lung and Blood Institute (K23HL145140) and the National Center for Advancing Translational Science (NCATS) Clinical and Translational Science Award at Einstein-Montefiore (UL1TR001073). Ulrich Jorde is supported by the McAdam Family Foundation (award number not applicable).

### **Author's Contributions**

Design of the project: FC, XX, and UPJ.

Underlying data verified by FC, XX, and UPJ.

Acquisition, analysis, and interpretation of data: FC, XX, OM, RK, YAP, SRP, MJC, ADR, DS, and UPJ.

Statistical analysis: FC and XX.

Obtained funding: UPJ

Manuscript writing: FC, XX, and UPJ.

Critical revision of the manuscript for important intellectual content: FC, XX, OM, RK, YAP, SRP, MJC, ADR, DS, and UPJ.

Supervision: UPJ

All the Authors reviewed the work and approved the final version.

FC and UPJ had full access to all the data in the study and take responsibility for the integrity of the data and the accuracy of the data analysis.

### **Acknowledgements**

Not applicable

## References

1. World Health Organization. WHO Director-General's opening remarks at the media briefing on COVID-19-11 March 2020: Geneva, Switzerland, 2020.
2. Bhatraju PK, Ghassemieh BJ, Nichols M, et al. Covid-19 in Critically Ill Patients in the Seattle Region — Case Series. *New England Journal of Medicine* 2020;382(21):2012-22. doi: 10.1056/NEJMoa2004500
3. John Hopkins University. COVID-19 Dashboard by the Center for Systems Science and Engineering (CSSE) at Johns Hopkins University (JHU): JHU; 2020 [Available from: <https://coronavirus.jhu.edu/map.html> accessed 1/20/2021].
4. Lozano R, Naghavi M, Foreman K, et al. Global and regional mortality from 235 causes of death for 20 age groups in 1990 and 2010: a systematic analysis for the Global Burden of Disease Study 2010. *Lancet* 2012;380(9859):2095-128. doi: 10.1016/S0140-6736(12)61728-0 [published Online First: 2012/12/19]
5. Zhou F, Yu T, Du R, et al. Clinical course and risk factors for mortality of adult inpatients with COVID-19 in Wuhan, China: a retrospective cohort study. *The Lancet* 2020;395(10229):1054-62. doi: 10.1016/S0140-6736(20)30566-3
6. Wu Z, McGoogan JM. Characteristics of and Important Lessons From the Coronavirus Disease 2019 (COVID-19) Outbreak in China: Summary of a Report of 72 314 Cases From the Chinese Center for Disease Control and Prevention. *Jama* 2020;323(13):1239-42. doi: 10.1001/jama.2020.2648 [published Online First: 2020/02/25]
7. Beigel JH, Tomashek KM, Dodd LE, et al. Remdesivir for the Treatment of Covid-19 — Final Report. *New England Journal of Medicine* 2020;383(19):1813-26. doi: 10.1056/NEJMoa2007764
8. Group RC, Horby P, Lim WS, et al. Dexamethasone in Hospitalized Patients with Covid-19 - Preliminary Report. *The New England journal of medicine* 2020 doi: 10.1056/NEJMoa2021436 [published Online First: 2020/07/18]
9. Thachil J, Tang N, Gando S, et al. ISTH interim guidance on recognition and management of coagulopathy in COVID-19. *Journal of Thrombosis and Haemostasis* 2020;18(5):1023-26. doi: <https://doi.org/10.1111/jth.14810>
10. Shelhamer MC, Wesson PD, Solari IL, et al. Prone Positioning in Moderate to Severe Acute Respiratory Distress Syndrome Due to COVID-19: A Cohort Study and Analysis of Physiology. *Journal of intensive care medicine* 2021;36(2):241-52. doi: 10.1177/0885066620980399 [published Online First: 2021/01/01]
11. Rosenberg ES, Tesoriero JM, Rosenthal EM, et al. Cumulative incidence and diagnosis of SARS-CoV-2 infection in New York. *Annals of epidemiology* 2020;48:23-29.e4. doi: 10.1016/j.annepidem.2020.06.004 [published Online First: 2020/07/11]
12. Sekine T, Perez-Potti A, Rivera-Ballesteros O, et al. Robust T Cell Immunity in Convalescent Individuals with Asymptomatic or Mild COVID-19. *Cell* 2020;183(1):158-68.e14. doi: <https://doi.org/10.1016/j.cell.2020.08.017>
13. Fill Malfertheiner S, Brandstetter S, Roth S, et al. Immune response to SARS-CoV-2 in health care workers following a COVID-19 outbreak: A prospective longitudinal study. *J Clin Virol* 2020;130:104575. doi: 10.1016/j.jcv.2020.104575 [published Online First: 2020/08/18]
14. Alvarez Villela M, Boucher T, Terre J, et al. Surge-in-Place: Conversion of a Cardiac Catheterization Laboratory Into a COVID-19 Intensive Care Unit and Back Again. *The Journal of invasive cardiology* 2020 [published Online First: 2020/12/22]

15. Putter H, Fiocco M, Geskus RB. Tutorial in biostatistics: competing risks and multi-state models. *Stat Med* 2007;26(11):2389-430. doi: 10.1002/sim.2712 [published Online First: 2006/10/13]
16. Gray RJ. A class of K-sample tests for comparing the cumulative incidence of a competing risk. *The Annals of statistics* 1988:1141-54.
17. Fine JP, Gray RJ. A Proportional Hazards Model for the Subdistribution of a Competing Risk. *Journal of the American Statistical Association* 1999;94(446):496-509. doi: 10.1080/01621459.1999.10474144
18. Schoenfeld D. Partial residuals for the proportional hazards regression model. *Biometrika* 1982;69(1):239-41.
19. Austin PC, Fine JP. Propensity-score matching with competing risks in survival analysis. *Stat Med* 2019;38(5):751-77. doi: 10.1002/sim.8008 [published Online First: 2018/10/23]
20. Zhou B, Latouche A, Rocha V, et al. Competing risks regression for stratified data. *Biometrics* 2011;67(2):661-70. doi: 10.1111/j.1541-0420.2010.01493.x [published Online First: 2010/12/16]
21. Philips K, Uong A, Buckenmyer T, et al. Rapid Implementation of an Adult Coronavirus Disease 2019 Unit in a Children's Hospital. *The Journal of pediatrics* 2020;222:22-27. doi: 10.1016/j.jpeds.2020.04.060 [published Online First: 2020/05/08]
22. New York City Office of the Mayor. News: New York City Office of the Mayor; [Available from: <https://www1.nyc.gov/office-of-the-mayor/news.page> accessed 1/17/2021.
23. Metropolitan Transportation Authority. Fare Data: Metropolitan Transportation Authority; [Available from: <http://web.mta.info/developers/fare.html> accessed 1/17/2021.
24. New York City Department of Health and Mental Hygiene. COVID-19: Data: New York City Department of Health and Mental Hygiene; 2021 [New York City Department of Health and Mental Hygiene:[Available from: <https://www1.nyc.gov/site/doh/covid/covid-19-data.page> accessed 1/17/2021.
25. State of New York. Executive Orders: State of New York; [Available from: <https://www.governor.ny.gov/keywords/executive-order> accessed 1/17/2021.
26. Cavalcanti AB, Zampieri FG, Rosa RG, et al. Hydroxychloroquine with or without Azithromycin in Mild-to-Moderate Covid-19. *The New England journal of medicine* 2020;383(21):2041-52. doi: 10.1056/NEJMoa2019014 [published Online First: 2020/07/25]
27. Sterne JAC, Murthy S, Diaz JV, et al. Association Between Administration of Systemic Corticosteroids and Mortality Among Critically Ill Patients With COVID-19: A Meta-analysis. *Jama* 2020;324(13):1330-41. doi: 10.1001/jama.2020.17023 [published Online First: 2020/09/03]
28. Carsana L, Sonzogni A, Nasr A, et al. Pulmonary post-mortem findings in a series of COVID-19 cases from northern Italy: a two-centre descriptive study. *The Lancet infectious diseases* 2020;20(10):1135-40.
29. United States Federal Drug Administration. FDA's approval of Veklury (remdesivir) for the treatment of COVID-19—The Science of Safety and Effectiveness: United States Federal Drug Administration; [Available from: <https://www.fda.gov/drugs/drug-safety-and-availability/fdas-approval-veklury-remdesivir-treatment-covid-19-science-safety-and-effectiveness> accessed 1/17/2021.

- 1  
2  
3  
4  
5  
6  
7  
8  
9  
10  
11  
12  
13  
14  
15  
16  
17  
18  
19  
20  
21  
22  
23  
24  
25  
26  
27  
28  
29  
30  
31  
32  
33  
34  
35  
36  
37  
38  
39  
40  
41  
42  
43  
44  
45  
46  
47  
48  
49  
50  
51  
52  
53  
54  
55  
56  
57  
58  
59  
60
30. Esler M, Esler D. Can angiotensin receptor-blocking drugs perhaps be harmful in the COVID-19 pandemic? *Journal of hypertension* 2020;38(5):781-82. doi: 10.1097/hjh.0000000000002450 [published Online First: 2020/03/21]
  31. Mancia G, Rea F, Ludergnani M, et al. Renin–Angiotensin–Aldosterone System Blockers and the Risk of Covid-19. *New England Journal of Medicine* 2020;382(25):2431-40. doi: 10.1056/NEJMoa2006923
  32. Zhang P, Zhu L, Cai J, et al. Association of Inpatient Use of Angiotensin-Converting Enzyme Inhibitors and Angiotensin II Receptor Blockers With Mortality Among Patients With Hypertension Hospitalized With COVID-19. *Circulation research* 2020;126(12):1671-81. doi: doi:10.1161/CIRCRESAHA.120.317134
  33. Tan WYT, Young BE, Lye DC, et al. Statin use is associated with lower disease severity in COVID-19 infection. *Scientific Reports* 2020;10(1):17458. doi: 10.1038/s41598-020-74492-0
  34. Saeed O, Castagna F, Agalliu I, et al. Statin Use and In-Hospital Mortality in Patients With Diabetes Mellitus and COVID-19. *Journal of the American Heart Association* 2020;9(24):e018475. doi: doi:10.1161/JAHA.120.018475
  35. Paul V, Patel S, Royse M, et al. Proning in Non-Intubated (PNI) in Times of COVID-19: Case Series and a Review. *Journal of intensive care medicine* 2020;35(8):818-24. doi: 10.1177/0885066620934801 [published Online First: 2020/07/08]
  36. New York City Department of Health and Mental Hygiene. Health Department Releases Detailed Report on COVID-19 Variants: New York City Department of Health and Mental Hygiene; 2021 [Available from: <https://www1.nyc.gov/site/doh/about/press/pr2021/health-department-releases-detailed-report-on-covid-19-variants.page> accessed 4/21/2021].



**Table 1. Demographics, Past Medical History, and Clinical Characteristics of Admitted Patients**

|                                                 | Spring (n=4495) |                     | Summer (n=264) |                    | Fall (n=377) |                    | Winter (n=2254) |                     |
|-------------------------------------------------|-----------------|---------------------|----------------|--------------------|--------------|--------------------|-----------------|---------------------|
|                                                 | Sample          | Value               | Sample         | Value              | Sample       | Value              | Sample          | Value               |
| <b>Demographics</b>                             |                 |                     |                |                    |              |                    |                 |                     |
| Age (IQR) - yr                                  | 4495            | 66 (55 - 77)        | 264            | 66 (50 - 76)       | 377          | 63 (50 - 73)       | 2254            | 67 (56 - 77)        |
| Male sex - no (%)                               | 4495            | 2377 (52.9)         | 264            | 138 (52.3)         | 377          | 198 (52.5)         | 2254            | 1122 (49.8)         |
| Black race and / or Hispanic ethnicity – no (%) | 4495            | 3345 (74.4)         | 264            | 219 (83.0)         | 377          | 286 (75.9)         | 2254            | 1635 (74.2)         |
| Body Mass Index (IQR) - kg/m <sup>2</sup>       | 4229            | 28.4 (24.6 - 33)    | 250            | 27.6 (22.5 - 32.7) | 358          | 28.6 (25 - 34.1)   | 2194            | 28.2 (24.4 - 33.1)  |
| Hospital bed saturation (IQR) - %               | 4495            | 97.4 (86.5 – 107.6) | 264            | 81.7 (76.3 – 85.8) | 377          | 87.6 (83.2 - 90.2) | 2254            | 95.3 (91.9 – 101.8) |
| <b>Past Medical History</b>                     |                 |                     |                |                    |              |                    |                 |                     |
| Hypertension - no (%)                           | 4495            | 3370 (75)           | 264            | 197 (74.6)         | 377          | 254 (67.4)         | 2254            | 1713 (76)           |
| Sleep apnea - no (%)                            | 4495            | 521 (11.6)          | 264            | 28 (10.6)          | 377          | 47 (12.5)          | 2254            | 270 (12)            |
| Hyperlipidemia - no (%)                         | 4495            | 2609 (58)           | 264            | 153 (58)           | 377          | 199 (52.8)         | 2254            | 1380 (61.2)         |
| Atrial fibrillation - no (%)                    | 4495            | 449 (10)            | 264            | 30 (11.4)          | 377          | 35 (9.3)           | 2254            | 267 (11.8)          |
| Chronic kidney disease - no (%)                 | 4495            | 1406 (31.3)         | 264            | 70 (26.5)          | 377          | 85 (22.5)          | 2254            | 620 (27.5)          |
| Heart failure - no (%)                          | 4495            | 980 (21.8)          | 264            | 72 (27.3)          | 377          | 66 (17.5)          | 2254            | 519 (23)            |
| Coronary artery disease - no (%)                | 4495            | 1316 (29.3)         | 264            | 95 (36)            | 377          | 108 (28.6)         | 2254            | 721 (32)            |
| Asthma/COPD - no (%)                            | 4495            | 1371 (30.5)         | 264            | 84 (31.8)          | 377          | 98 (26)            | 2254            | 753 (33.4)          |
| Diabetes mellitus - no (%)                      | 4495            | 2522 (56.1)         | 264            | 148 (56.1)         | 377          | 187 (49.6)         | 2254            | 1244 (55.2)         |



| <b>Vitals at Presentation</b>                |      |                    |     |                    |     |                    |      |                    |
|----------------------------------------------|------|--------------------|-----|--------------------|-----|--------------------|------|--------------------|
| Temperature (IQR) - F                        | 4463 | 98.9 (98.2 - 100)  | 264 | 98.4 (97.8 - 98.9) | 372 | 98.8 (98.1 - 99.9) | 2254 | 98.7 (98.1 - 99.8) |
| SBP (IQR) - mmHg                             | 4469 | 131 (114 - 148)    | 264 | 132 (117 - 149)    | 375 | 131 (117 - 147)    | 2254 | 132 (117 - 148)    |
| DBP (IQR) - mmHg                             | 4465 | 75 (65 - 84)       | 263 | 77 (67 - 87)       | 374 | 74 (68 - 84)       | 2252 | 75 (67 - 84)       |
| HR (IQR) – bpm                               | 4467 | 98 (85 - 112)      | 264 | 92.5 (76.3 - 105)  | 372 | 94 (80 - 107)      | 2253 | 95 (82 - 107)      |
| Oxygen saturation (IQR) - %                  | 4463 | 95 (91 - 98)       | 264 | 98 (96 - 99)       | 372 | 96 (94 - 98)       | 2253 | 96 (92 - 98)       |
| Respiratory Rate (IQR) - bpm                 | 4466 | 20 (18 - 22)       | 264 | 18 (17 - 20)       | 372 | 18 (18 - 20)       | 2254 | 19 (18 - 22)       |
| <b>Laboratory Markers</b>                    |      |                    |     |                    |     |                    |      |                    |
| Hemoglobin (IQR) - g/dL                      | 4372 | 12.8 (11.2 - 14.1) | 261 | 12.4 (10.7 - 13.9) | 370 | 13 (11.6 - 14.3)   | 2228 | 12.9 (11.5 - 14.2) |
| Platelet count (IQR) -k/ $\mu$ L             | 4372 | 188 (116 - 260)    | 261 | 228 (169 - 300)    | 372 | 200 (144 - 257)    | 2228 | 196 (143 - 259)    |
| White blood cell count (IQR) - k/ $\mu$ L    | 4372 | 7.5 (5.6 - 10.6)   | 261 | 8 (5.8 - 11)       | 370 | 6.6 (5.1 - 8.9)    | 2228 | 6.4 (4.7 - 8.8)    |
| Absolute lymphocyte count (IQR) - k/ $\mu$ L | 4420 | 1 (0.7 - 1.4)      | 263 | 1.2 (0.9 - 1.8)    | 374 | 1.1 (0.8 - 1.5)    | 2246 | 1 (0.7 - 1.4)      |
| Sodium (IQR) – mEq/L                         | 4414 | 137 (134 - 141)    | 263 | 138 (135 - 141)    | 377 | 137 (135 - 140)    | 2253 | 137 (134 - 140)    |
| Potassium (IQR) – mEq/L                      | 4389 | 4.3 (3.9 - 4.8)    | 262 | 4.2 (3.8 - 4.6)    | 377 | 4 (3.8 - 4.4)      | 2243 | 4.1 (3.8 - 4.5)    |
| Chloride (IQR) – mEq/L                       | 4394 | 98 (95 - 103)      | 263 | 103 (100 - 105)    | 377 | 101 (99 - 104)     | 2253 | 101 (98 - 104)     |
| Bicarbonates (IQR) – mEq/L                   | 4414 | 24 (20 - 26)       | 263 | 24 (21 - 27)       | 377 | 25 (22 - 27)       | 2253 | 24 (21 - 27)       |
| Creatinine (IQR) - mg/dL                     | 4410 | 1.1 (0.8 - 2)      | 263 | 1 (0.8 - 1.5)      | 377 | 1 (0.8 - 1.3)      | 2253 | 1.1 (0.8 - 1.5)    |
| Glucose (IQR) - mg/dL                        | 4414 | 134 (108 - 197)    | 263 | 121 (100 - 171)    | 377 | 122 (102 - 173)    | 2253 | 126 (104 - 184)    |

|                                        |      |                    |     |                    |     |                    |      |                    |
|----------------------------------------|------|--------------------|-----|--------------------|-----|--------------------|------|--------------------|
| Aspartate aminotransferase (IQR) - U/L | 4045 | 40 (27 - 65)       | 245 | 26 (20 - 38)       | 354 | 31 (21 - 47)       | 2084 | 35 (24 - 55)       |
| Alanine aminotransferase (IQR) - U/L   | 4206 | 27 (17 - 44)       | 252 | 21 (14 - 32)       | 361 | 25 (16 - 41)       | 2171 | 26 (17 - 44)       |
| Lactic acid (IQR) – mmol/L             | 3981 | 2.1 (1.6 - 3)      | 220 | 1.9 (1.4 - 2.7)    | 330 | 1.8 (1.3 - 2.5)    | 1913 | 1.9 (1.4 - 2.5)    |
| Lactate dehydrogenase (IQR) - mmol/L   | 2935 | 384 (285 - 535)    | 160 | 254.5 (196 - 340)  | 285 | 300 (225 - 383)    | 1563 | 341 (254 - 468)    |
| Creatine Kinase (IQR) – U/L            | 3453 | 168 (83 - 401)     | 209 | 97 (57 - 176)      | 313 | 116 (60 - 213)     | 1957 | 126 (67 - 282)     |
| D-dimer (IQR) - µg/mL                  | 2204 | 1.8 (0.9 - 3.9)    | 185 | 1.1 (0.5 - 2.2)    | 317 | 0.8 (0.5 - 1.6)    | 1907 | 1.2 (0.7 - 2.3)    |
| Procalcitonin (IQR) – ng/mL            | 1789 | 0.2 (0.1 - 0.9)    | 120 | 0.1 (0.1 - 0.4)    | 254 | 0.1 (0.1 - 0.2)    | 1252 | 0.1 (0.1 - 0.3)    |
| Troponin T* (IQR) - ng/mL              | 0    | NA                 | 219 | 0.01 (0.01 - 0.03) | 342 | 0.01 (0.01 - 0.02) | 2106 | 0.01 (0.01 - 0.03) |
| Troponin I* (IQR) – ng/mL              | 3662 | 0.01 (0.01 - 0.03) | 3   | 0.01 (0.01 - 0.01) | 0   | NA                 | 0    | NA                 |
| Interleukin-6 (IQR) – pg/mL            | 1056 | 33.6 (13.8 - 75.2) | 87  | 11.7 (3 - 43.1)    | 186 | 11 (4.7 - 22.2)    | 710  | 10.8 (4.3 - 25.6)  |
| Fibrinogen (IQR) – mg/dL               | 1552 | 624 (491 - 750)    | 122 | 448 (370- 583)     | 224 | 540 (436 - 663)    | 1040 | 535.5 (434 - 652)  |
| Ferritin (IQR) – ng/mL                 | 1969 | 716 (335 - 1498)   | 155 | 228 (90 - 562)     | 293 | 364 (166 - 785)    | 1637 | 510 (230 - 1094)   |

COPD = Chronic obstructive pulmonary disease; DBP = Diastolic blood pressure; HR = Heart rate; IQR = Interquartile range; SBP = Systolic blood pressure. \* Troponin T was available only until June 2020, Troponin I was available only after June 2020.

## Figure Legends

### Figure 1. Simultaneously Admitted Patients

This graph includes the hospitalized patients and the admitted patients in the emergency department waiting for a bed. A precipitous decline of non-COVID-19 admissions begins on March 16, 2020 (vertical gray line) coinciding with gubernatorial health care associated directives in the State of New York. The dotted red line indicates the nominal bed capacity of our institution (1,491 beds).

### Figure 2. Cumulative Monthly Admission and Mortality

Cumulative monthly admissions (blue line, left axis) and mortality (orange line, right axis) over the year.

### Figure 3. Change in Therapies

Percent of patients receiving specific therapies over the year.

### Figure 4. Cumulative Incidences

30-day in-hospital mortality by seasons.

1  
2  
3  
4  
5  
6  
7  
8  
9  
10  
11  
12  
13  
14  
15  
16  
17  
18  
19  
20  
21  
22  
23  
24  
25  
26  
27  
28  
29  
30  
31  
32  
33  
34  
35  
36  
37  
38  
39  
40  
41  
42  
43  
44  
45  
46  
47  
48  
49  
50  
51  
52  
53  
54  
55  
56  
57  
58  
59  
60

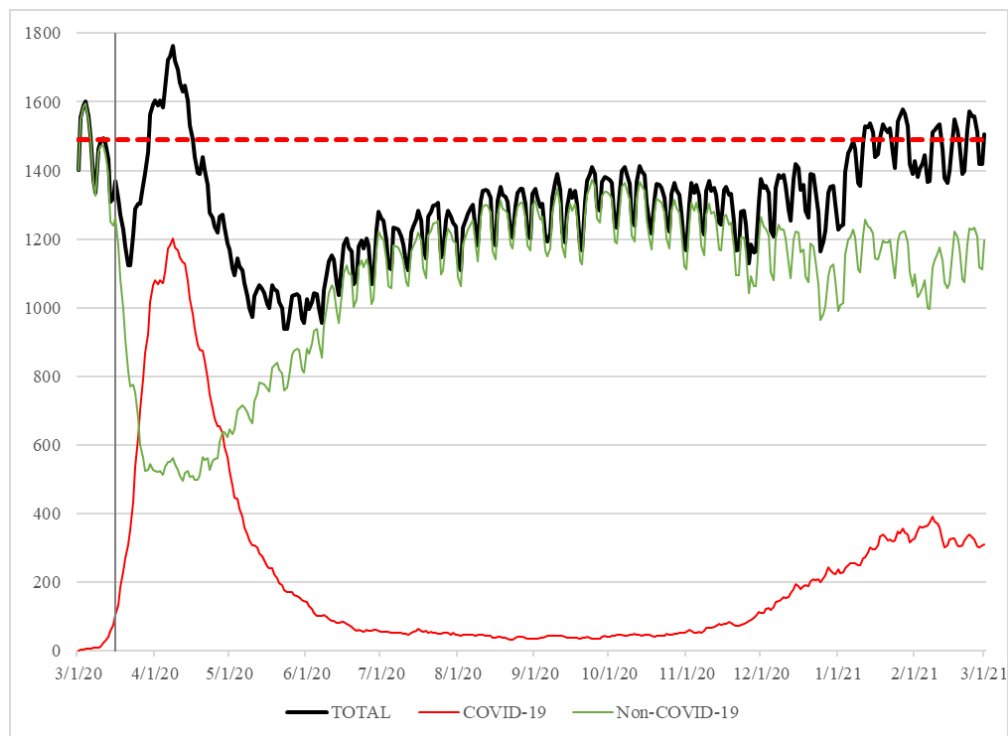

170x124mm (150 x 150 DPI)

1  
2  
3  
4  
5  
6  
7  
8  
9  
10  
11  
12  
13  
14  
15  
16  
17  
18  
19  
20  
21  
22  
23  
24  
25  
26  
27  
28  
29  
30  
31  
32  
33  
34  
35  
36  
37  
38  
39  
40  
41  
42  
43  
44  
45  
46  
47  
48  
49  
50  
51  
52  
53  
54  
55  
56  
57  
58  
59  
60

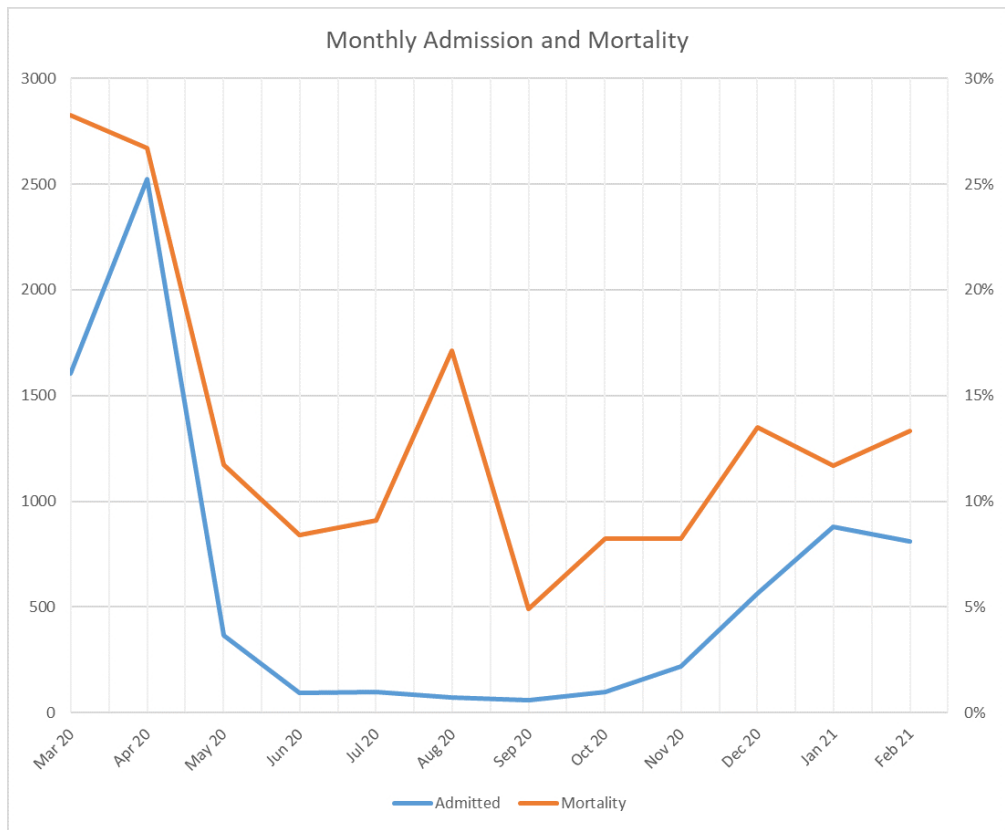

185x153mm (150 x 150 DPI)

1  
2  
3  
4  
5  
6  
7  
8  
9  
10  
11  
12  
13  
14  
15  
16  
17  
18  
19  
20  
21  
22  
23  
24  
25  
26  
27  
28  
29  
30  
31  
32  
33  
34  
35  
36  
37  
38  
39  
40  
41  
42  
43  
44  
45  
46  
47  
48  
49  
50  
51  
52  
53  
54  
55  
56  
57  
58  
59  
60

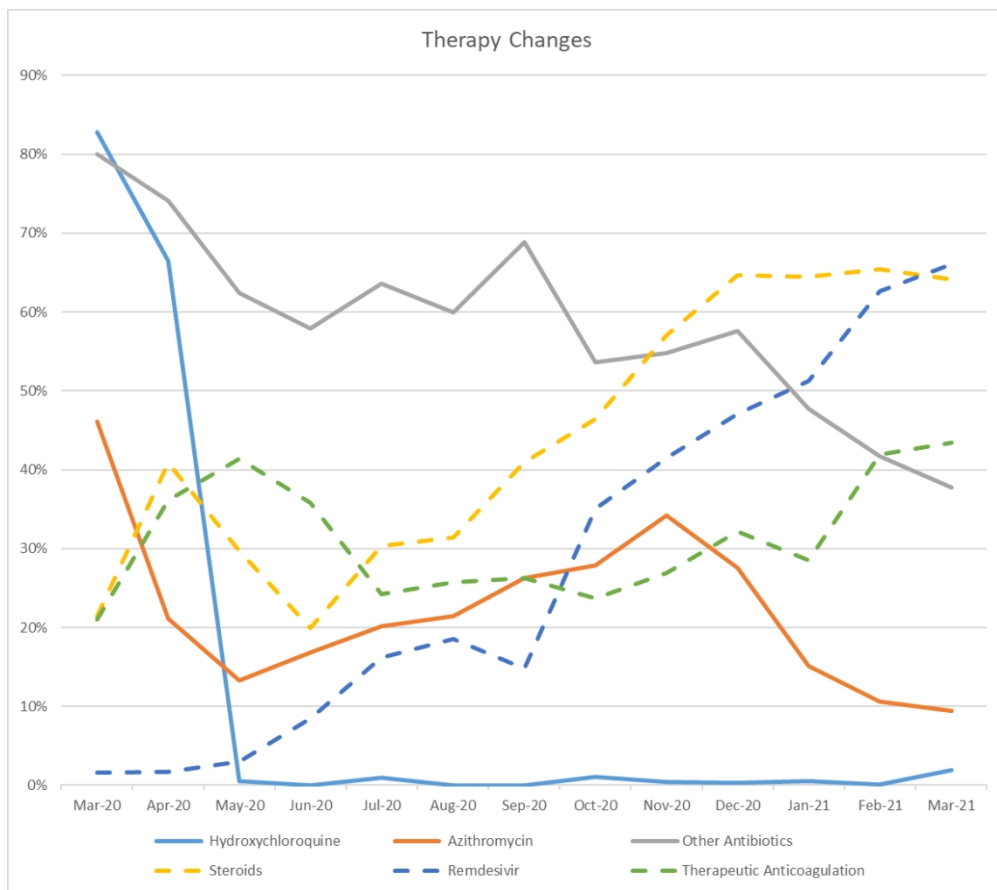

200x177mm (150 x 150 DPI)

1  
2  
3  
4  
5  
6  
7  
8  
9  
10  
11  
12  
13  
14  
15  
16  
17  
18  
19  
20  
21  
22  
23  
24  
25  
26  
27  
28  
29  
30  
31  
32  
33  
34  
35  
36  
37  
38  
39  
40  
41  
42  
43  
44  
45  
46  
47  
48  
49  
50  
51  
52  
53  
54  
55  
56  
57  
58  
59  
60

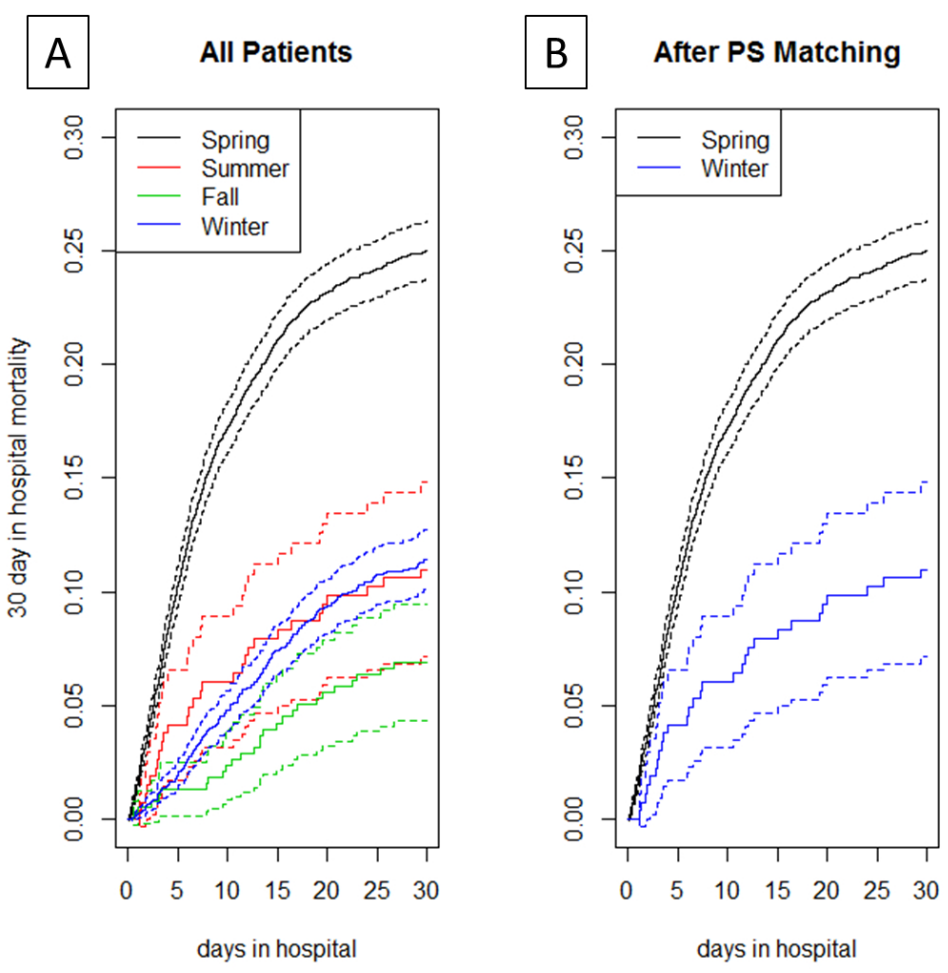

177x177mm (150 x 150 DPI)

**Supplemental Appendix**

**Table of contents**

Supplemental Methods..... 3

Supplemental Figure 1 - Distribution of Propensity Score..... 5

Supplemental Table 1 - Therapies Administered during the Admission..... 6

Supplemental Table 2 - Comparison Survivors versus Nonsurvivors..... 7

Supplemental Table 3 - Comparison Spring Vs Winter..... 10

Supplemental References..... 13

For peer review only



1  
2  
3  
4  
5 Francesco Castagna MD<sup>1</sup>, Xiaonan Xue PhD<sup>2</sup>, Omar Saeed MD<sup>1</sup>, Rachna Kataria MD<sup>1</sup>, Yoram  
6  
7 A Puius MD PhD<sup>3</sup>, Snehal R Patel MD<sup>1</sup>, Mario J Garcia MD<sup>1</sup>, Andrew D Racine MD<sup>4</sup>, Daniel B  
8  
9 Sims MD<sup>1</sup>, Ulrich P Jorde MD<sup>1</sup>  
10  
11  
12  
13

14  
15 <sup>1</sup> Division of Cardiology, Montefiore Medical Center and Albert Einstein College of Medicine,  
16  
17 Bronx, NY  
18

19  
20 <sup>2</sup> Department of Epidemiology and Population Health, Albert Einstein College of Medicine,  
21  
22 Bronx, NY  
23

24  
25 <sup>3</sup> Division of Infectious Diseases, Montefiore Medical Center and Albert Einstein College of  
26  
27 Medicine, Bronx, NY  
28

29  
30 <sup>4</sup> Department of Pediatrics, Montefiore Medical Center and Albert Einstein College of Medicine,  
31  
32 Bronx, New York.  
33  
34  
35  
36  
37  
38  
39  
40  
41  
42  
43  
44  
45  
46  
47  
48  
49  
50  
51  
52  
53  
54  
55  
56  
57  
58  
59  
60

## Supplemental Methods

### *Covariate Selection Method for Multivariable Competing Risk Proportional Hazard Models for Time to In-hospital Death*

The covariates in the multivariable analyses included factors present in > 90% of our dataset, known to be associated with in-hospital COVID-19 mortality based on prior literature<sup>1-3</sup>, or with a univariate association with in-hospital mortality ( $p < 0.05$ ) and a clinical (relative difference >5%) difference between survivors and non survivors (**Supplemental Table 2**). These variables included: age, sex, body mass index (BMI), vital signs at presentation (temperature, systolic and diastolic blood pressure, heart rate, respiratory rate, pulse oxygen saturation), platelet count, white cell count, potassium, bicarbonate, creatinine, glucose, alanine transaminase, aspartate transaminase, history of hypertension, dyslipidemia, chronic kidney disease (CKD), heart failure, coronary artery disease, asthma/chronic obstructive pulmonary disease, diabetes mellitus and statin use. Additionally, lactic acid level and percent of hospital bed saturation were forced into the model as marker of illness severity and level of hospital stress, respectively.

### *Covariate Selection Method for Multivariable Competing Risk Proportional Hazard Models for in-hospital Death between Patients Spring and Winter Patients*

The covariates in the multivariable analyses included factors present in > 90% of our dataset, are known to be associated with in-hospital COVID-19 mortality based on prior literature or with a univariate association between admission season (exposure) or in-hospital mortality (outcome) ( $p < 0.05$ ) and a clinical (relative difference >5%) difference between the spring and winter patients (**Supplemental Table 3**). These variables included: age, sex, BMI, vital signs at

1  
2  
3 presentation, white cell count, creatinine, glucose, alanine transaminase, history of hypertension,  
4  
5 dyslipidemia, chronic kidney disease (CKD), heart failure, coronary artery disease,  
6  
7 asthma/chronic obstructive pulmonary disease, diabetes mellitus and statin use. Also in this  
8  
9 model, lactic acid level and percent of hospital bed saturation were forced into the model as  
10  
11 marker of illness severity and level of hospital stress, respectively.  
12  
13  
14  
15  
16  
17  
18  
19  
20  
21  
22  
23  
24  
25  
26  
27  
28  
29  
30  
31  
32  
33  
34  
35  
36  
37  
38  
39  
40  
41  
42  
43  
44  
45  
46  
47  
48  
49  
50  
51  
52  
53  
54  
55  
56  
57  
58  
59  
60

For peer review only

Supplemental Figure 1 - Distribution of Propensity Score

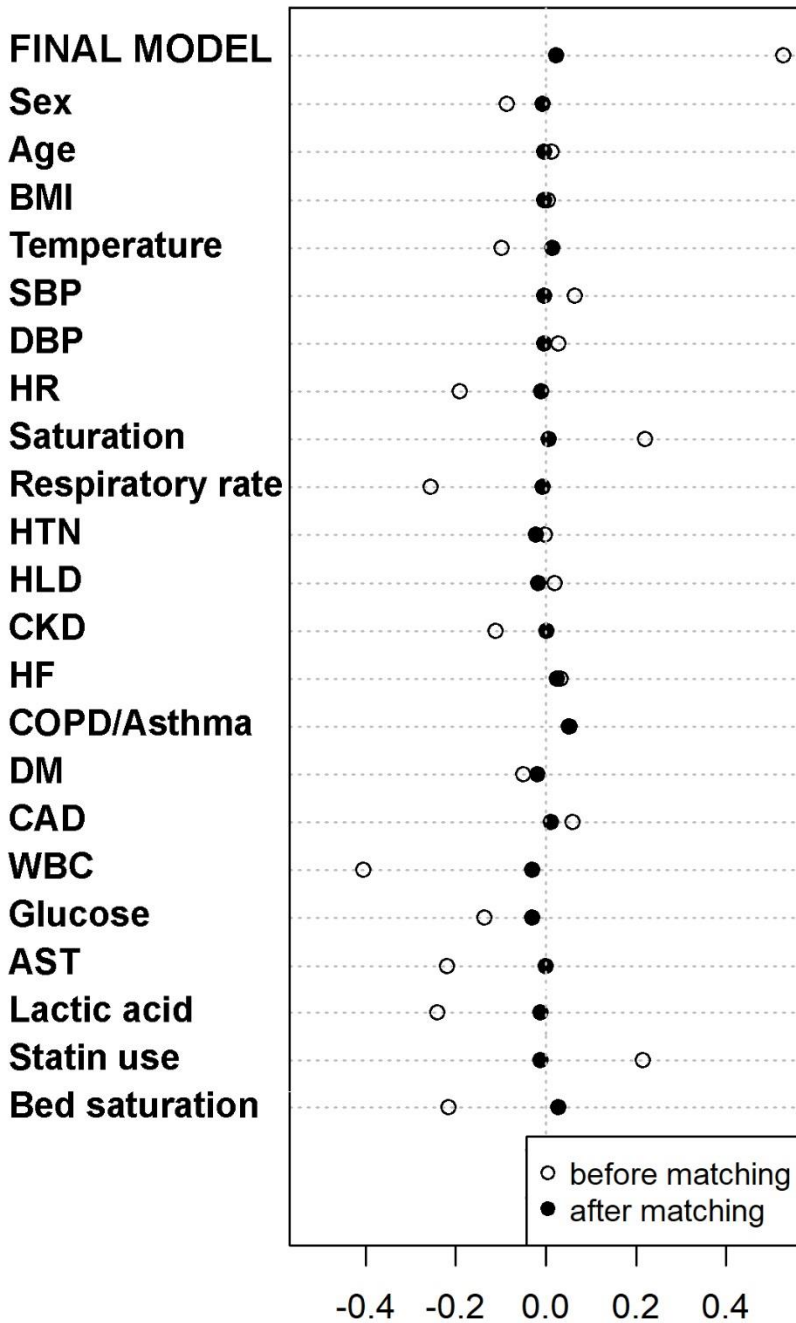

AST = aspartate transaminase; BMI= body mass index; CAD= coronary artery disease; COPD = chronic obstructive pulmonary disease; CKD = chronic kidney disease; DBP= diastolic blood pressure; DM = Diabetes mellitus; HF= heart failure; HLD = hyperlipidemia; HNT = hypertension; HR = heart rate; SBP = systolic blood pressure; WBC = white blood cell count

**Supplemental Table 1 - Therapies Administered during the Admission**

|                                                          | <b>Spring<br/>(n=4495)</b> | <b>Summer<br/>(n=264)</b> | <b>Fall<br/>(n=377)</b> | <b>Winter<br/>(n=2254)</b> |
|----------------------------------------------------------|----------------------------|---------------------------|-------------------------|----------------------------|
| <b>Hydroxychloroquine - no (%)</b>                       | 3007 (66.9)                | 1 (0.4)                   | 2 (0.5)                 | 8 (0.4)                    |
| <b>Azithromycin - no (%)</b>                             | 1322 (29.4)                | 51 (19.3)                 | 118 (31.3)              | 374 (16.6)                 |
| <b>Other antibiotics - no (%)</b>                        | 3382 (75.2)                | 160 (60.6)                | 214 (56.8)              | 1082 (48)                  |
| <b>Steroids - no (%)</b>                                 | 1485 (33)                  | 71 (26.9)                 | 195 (51.7)              | 1462 (64.9)                |
| <b>Angiotensin-converting-enzyme Inhibitors - no (%)</b> | 318 (7.1)                  | 36 (13.6)                 | 51 (13.5)               | 269 (11.9)                 |
| <b>Angiotensin II receptor blockers - no (%)</b>         | 264 (5.9)                  | 23 (8.7)                  | 32 (8.5)                | 212 (9.4)                  |
| <b>Statin - no (%)</b>                                   | 1478 (32.9)                | 109 (41.3)                | 129 (34.2)              | 1002 (44.5)                |
| <b>Therapeutic anticoagulation - no (%)</b>              | 1041/4496<br>(31.2)        | 76 (28.8)                 | 98 (26.0)               | 772 (34.3)                 |
| <b>Remdesivir* - no (%)</b>                              | 78 (1.7)                   | 37 (14)                   | 134 (35.5)              | 1224 (54.3)                |
| <b>Lopinavir/Ritonavir – no (%)</b>                      | 40 (0.9)                   | 0 (0)                     | 0 (0)                   | 0 (0)                      |
| <b>Ivermectin – no (%)</b>                               | 11 (0.2)                   | 1 (0.4)                   | 0 (0)                   | 34 (1.5)                   |

\* 45 patients listed as remdesivir recipients in the spring season were part of a 1:1 double-blind, placebo-controlled study. Instead, all the patients in summer, fall, and winter seasons listed as remdesivir recipients received the actual medication.

**Supplemental Table 2 - Comparison Survivors versus Nonsurvivors**

|                                                 | Survivors (n=5953) |                     | Nonsurvivors (n=1437) |                     | p-value |
|-------------------------------------------------|--------------------|---------------------|-----------------------|---------------------|---------|
|                                                 | Sample             | Value               | Sample                | Value               |         |
| <b>Demographics</b>                             |                    |                     |                       |                     |         |
| Age (IQR) - yr                                  | 5953               | 64 (52 - 75)        | 1437                  | 73 (65 - 82)        | <0.001  |
| Male sex - no (%)                               | 5953               | 2989 (50.2)         | 1437                  | 846 (58.9)          | <0.001  |
| Black race and / or Hispanic ethnicity – no (%) | 5953               | 4472 (75.1)         | 1437                  | 1013 (70.5)         | <0.001  |
| Body Mass Index (IQR) - kg/m <sup>2</sup>       | 5679               | 28.4 (24.6 - 33.2)  | 1352                  | 27.9 (23.8 - 32.6)  | <0.001  |
| Hospital bed saturation (IQR) - %               | 5953               | 94.1 (86.5 - 104.8) | 1437                  | 99.3 (87.5 - 107.6) | <0.001  |
| <b>Past Medical History</b>                     |                    |                     |                       |                     |         |
| Hypertension - no (%)                           | 5953               | 4365 (73.3)         | 1437                  | 1169 (81.4)         | <0.001  |
| Sleep apnea - no (%)                            | 5953               | 688 (11.6)          | 1437                  | 178 (12.4)          | 0.38    |
| Hyperlipidemia - no (%)                         | 5953               | 3366 (56.5)         | 1437                  | 975 (67.8)          | <0.001  |
| Atrial fibrillation - no (%)                    | 5953               | 557 (9.4)           | 1437                  | 224 (15.6)          | <0.001  |
| Chronic kidney disease - no (%)                 | 5953               | 1559 (26.2)         | 1437                  | 622 (43.3)          | <0.001  |
| Heart failure - no (%)                          | 5953               | 1181 (19.8)         | 1437                  | 456 (31.7)          | <0.001  |
| Coronary artery disease - no (%)                | 5953               | 1653 (27.8)         | 1437                  | 587 (40.8)          | <0.001  |
| Asthma/COPD - no (%)                            | 5953               | 1842 (30.9)         | 1437                  | 464 (32.3)          | 0.32    |
| Diabetes mellitus - no (%)                      | 5953               | 3168 (53.2)         | 1437                  | 933 (64.9)          | <0.001  |
| <b>Vitals at Presentation</b>                   |                    |                     |                       |                     |         |
| Temperature (IQR) - F                           | 5926               | 99 (98 - 100)       | 1427                  | 99 (98 - 100)       | 0.35    |

|                                              |      |                    |      |                    |        |
|----------------------------------------------|------|--------------------|------|--------------------|--------|
| SBP (IQR) - mmHg                             | 5932 | 132 (117 - 148)    | 1430 | 127 (107 - 146)    | <0.001 |
| DBP (IQR) - mmHg                             | 5926 | 76 (67 - 85)       | 1428 | 71 (60 - 81)       | <0.001 |
| HR (IQR) – bpm                               | 5927 | 96 (83 - 110)      | 1429 | 100 (85 - 114)     | <0.001 |
| Oxygen saturation (IQR) - %                  | 5922 | 96 (93 - 98)       | 1430 | 92 (84 - 96)       | <0.001 |
| Respiratory Rate (IQR) - bpm                 | 5928 | 19 (18 - 21)       | 1428 | 22 (19 - 26)       | <0.001 |
| <b>Laboratory Markers</b>                    |      |                    |      |                    |        |
| Hemoglobin (IQR) - g/dL                      | 5823 | 12.9 (11.4 - 14.1) | 1408 | 12.6 (10.9 - 14.2) | 0.006  |
| Platelet count (IQR) -k/ $\mu$ L             | 5825 | 198 (137 - 264)    | 1408 | 172 (88 - 246)     | <0.001 |
| White blood cell count (IQR) - k/ $\mu$ L    | 5823 | 6.9 (5.1 - 9.5)    | 1408 | 8.3 (6.0 - 11.9)   | <0.001 |
| Absolute lymphocyte count (IQR) - k/ $\mu$ L | 5880 | 1.1 (0.7 - 1.5)    | 1423 | 0.9 (0.6 - 1.2)    | <0.001 |
| Sodium (IQR) – mEq/L                         | 5879 | 137 (134 - 140)    | 1428 | 138 (134 - 143)    | <0.001 |
| Potassium (IQR) – mEq/L                      | 5845 | 4.2 (3.8 - 4.6)    | 1426 | 4.4 (4.0 – 5.0)    | <0.001 |
| Chloride (IQR) – mEq/L                       | 5864 | 100 (96 - 103)     | 1423 | 100 (95 - 104)     | 0.28   |
| Bicarbonates (IQR) – mEq/L                   | 5879 | 24 (21 - 27)       | 1428 | 22 (18 - 25)       | <0.001 |
| Creatinine (IQR) - mg/dL                     | 5876 | 1.0 (0.8 - 1.5)    | 1427 | 1.6 (1 - 2.9)      | <0.001 |
| Glucose (IQR) - mg/dL                        | 5879 | 126 (104 - 179)    | 1428 | 156 (121 - 236)    | <0.001 |
| Aspartate aminotransferase (IQR) - U/L       | 5416 | 35 (24 - 55)       | 1312 | 52 (33 - 81)       | <0.001 |
| Alanine aminotransferase (IQR) - U/L         | 5614 | 26 (16 - 42)       | 1376 | 28 (18 - 46)       | <0.001 |
| Lactic acid (IQR) – mmol/L                   | 5097 | 1.9 (1.4 - 2.6)    | 1347 | 2.6 (1.8 - 3.9)    | <0.001 |
| Lactate dehydrogenase (IQR) - mmol/L         | 4017 | 384 $\pm$ 219      | 926  | 518 (371 - 706)    | <0.001 |
| Creatine Kinase (IQR) – U/L                  | 4714 | 336 (253 - 454)    | 1218 | 777 $\pm$ 2657     | <0.001 |
| D-dimer (IQR) - $\mu$ g/mL                   | 3850 | 1.2 (0.7 - 2.5)    | 763  | 2.5 (1.3 - 6.9)    | <0.001 |
| Procalcitonin (IQR) – ng/mL                  | 2800 | 0.1 (0.1 - 0.3)    | 615  | 0.6 (0.2 - 2.4)    | <0.001 |

|                             |      |                    |     |                    |        |
|-----------------------------|------|--------------------|-----|--------------------|--------|
| Troponin T* (IQR) - ng/mL   | 2365 | 0.01 (0.01 - 0.03) | 302 | 0.03 (0.01 - 0.1)  | <0.001 |
| Troponin I* (IQR) - ng/mL   | 2684 | 0.01 (0.01 - 0.02) | 981 | 0.02 (0.01 - 0.08) | <0.001 |
| Interleukin-6 (IQR) - pg/mL | 1752 | 17 (6 - 40)        | 287 | 68 (26- 154)       | <0.001 |
| Fibrinogen (IQR) - mg/dL    | 2478 | 570 (448 - 690)    | 460 | 621 (506 - 761)    | <0.001 |
| Ferritin (IQR) - ng/mL      | 3395 | 521 (224 - 1112)   | 659 | 1021 (514 - 2161)  | <0.001 |

COPD = Chronic obstructive pulmonary disease; DBP = Diastolic blood pressure; HR = Heart rate; IQR = Interquartile range; SBP = Systolic blood pressure. \* Troponin T was available only until June 2020, Troponin I was available only after June 2020.



**Supplemental Table 3 - Comparison Spring Vs Winter**

|                                                 | Spring (n=4495) |                     | Winter (n=2254) |                     | P-value |
|-------------------------------------------------|-----------------|---------------------|-----------------|---------------------|---------|
|                                                 | Sample          | Value               | Sample          | Value               |         |
| <b>Demographics</b>                             |                 |                     |                 |                     |         |
| Age (IQR) - yr                                  | 4495            | 66 (55 - 77)        | 2254            | 67 (56 - 77)        | 0.051   |
| Male sex - no (%)                               | 4495            | 2377 (52.9)         | 2254            | 1122 (49.8)         | 0.016   |
| Black race and / or Hispanic ethnicity – no (%) | 4495            | 3345 (74.4)         | 2254            | 1635 (72.5)         | 0.098   |
| Body Mass Index (IQR) - kg/m <sup>2</sup>       | 4229            | 28.4 (24.6 - 33)    | 2194            | 28.2 (24.4 - 33.1)  | 0.433   |
| Hospital bed saturation (IQR) - %               | 4495            | 97.4 (86.5 – 107.6) | 2254            | 95.3 (91.9 – 101.8) | <0.001  |
| <b>Past Medical History</b>                     |                 |                     |                 |                     |         |
| Hypertension - no (%)                           | 4495            | 3370 (75)           | 2254            | 1713 (76)           | 0.357   |
| Sleep apnea - no (%)                            | 4495            | 521 (11.6)          | 2254            | 270 (12)            | 0.640   |
| Hyperlipidemia - no (%)                         | 4495            | 2609 (58)           | 2254            | 1380 (61.2)         | 0.012   |
| Atrial fibrillation - no (%)                    | 4495            | 449 (10)            | 2254            | 267 (11.8)          | 0.019   |
| Chronic kidney disease - no (%)                 | 4495            | 1406 (31.3)         | 2254            | 620 (27.5)          | 0.001   |
| Heart failure - no (%)                          | 4495            | 980 (21.8)          | 2254            | 519 (23)            | 0.254   |
| Coronary artery disease - no (%)                | 4495            | 1316 (29.3)         | 2254            | 721 (32)            | 0.022   |
| Asthma/COPD - no (%)                            | 4495            | 1371 (30.5)         | 2254            | 753 (33.4)          | 0.015   |
| Diabetes mellitus - no (%)                      | 4495            | 2522 (56.1)         | 2254            | 1244 (55.2)         | 0.475   |
| <b>Vitals at Presentation</b>                   |                 |                     |                 |                     |         |
| Temperature (IQR) - F                           | 4463            | 98.9 (98.2 - 100)   | 2254            | 98.7 (98.1 - 99.8)  | <0.001  |

|                                              |      |                    |      |                    |        |
|----------------------------------------------|------|--------------------|------|--------------------|--------|
| SBP (IQR) - mmHg                             | 4469 | 131 (114 - 148)    | 2254 | 132 (117 - 148)    | 0.002  |
| DBP (IQR) - mmHg                             | 4465 | 75 (65 - 84)       | 2252 | 75 (67 - 84)       | 0.117  |
| HR (IQR) – bpm                               | 4467 | 98 (85 - 112)      | 2253 | 95 (82 - 107)      | <0.001 |
| Oxygen saturation (IQR) - %                  | 4463 | 95 (91 - 98)       | 2253 | 96 (92 - 98)       | <0.001 |
| Respiratory Rate (IQR) - bpm                 | 4466 | 20 (18 - 22)       | 2254 | 19 (18 - 22)       | <0.001 |
| <b>Laboratory Markers</b>                    |      |                    |      |                    |        |
| Hemoglobin (IQR) - g/dL                      | 4372 | 12.8 (11.2 - 14.1) | 2228 | 12.9 (11.5 - 14.2) | 0.030  |
| Platelet count (IQR) -k/ $\mu$ L             | 4372 | 188 (116 - 260)    | 2228 | 196 (143 - 259)    | <0.001 |
| White blood cell count (IQR) - k/ $\mu$ L    | 4372 | 7.5 (5.6 - 10.6)   | 2228 | 6.4 (4.7 - 8.8)    | <0.001 |
| Absolute lymphocyte count (IQR) - k/ $\mu$ L | 4420 | 1 (0.7 - 1.4)      | 2246 | 1 (0.7 - 1.4)      | 0.062  |
| Sodium (IQR) – mEq/L                         | 4414 | 137 (134 - 141)    | 2253 | 137 (134 - 140)    | <0.001 |
| Potassium (IQR) – mEq/L                      | 4389 | 4.3 (3.9 - 4.8)    | 2243 | 4.1 (3.8 - 4.5)    | <0.001 |
| Chloride (IQR) – mEq/L                       | 4394 | 98 (95 - 103)      | 2253 | 101 (98 - 104)     | <0.001 |
| Bicarbonates (IQR) – mEq/L                   | 4414 | 24 (20 - 26)       | 2253 | 24 (21 - 27)       | <0.001 |
| Creatinine (IQR) - mg/dL                     | 4410 | 1.1 (0.8 - 2)      | 2253 | 1.1 (0.8 - 1.5)    | <0.001 |
| Glucose (IQR) - mg/dL                        | 4414 | 134 (108 - 197)    | 2253 | 126 (104 - 184)    | <0.001 |
| Aspartate aminotransferase (IQR) - U/L       | 4045 | 40 (27 - 65)       | 2084 | 35 (24 - 55)       | <0.001 |
| Alanine aminotransferase (IQR) - U/L         | 4206 | 27 (17 - 44)       | 2171 | 26 (17 - 44)       | 0.292  |
| Lactic acid (IQR) – mmol/L                   | 3981 | 2.1 (1.6 - 3)      | 1913 | 1.9 (1.4 - 2.5)    | <0.001 |
| Lactate dehydrogenase (IQR) - mmol/L         | 2935 | 384 (285 - 535)    | 1563 | 341 (254 - 468)    | <0.001 |
| Creatine Kinase (IQR) – U/L                  | 3453 | 168 (83 - 401)     | 1957 | 126 (67 - 282)     | <0.001 |
| D-dimer (IQR) - $\mu$ g/mL                   | 2204 | 1.8 (0.9 - 3.9)    | 1907 | 1.2 (0.7 - 2.3)    | <0.001 |

|                             |      |                    |      |                    |        |
|-----------------------------|------|--------------------|------|--------------------|--------|
| Procalcitonin (IQR) – ng/mL | 1789 | 0.2 (0.1 - 0.9)    | 1252 | 0.1 (0.1 - 0.3)    | <0.001 |
| Troponin T* (IQR) - ng/mL   | 0    | NA                 | 2106 | 0.01 (0.01 - 0.03) | NA     |
| Troponin I* (IQR) – ng/mL   | 3662 | 0.01 (0.01 - 0.03) | 0    | NA                 | NA     |
| Interleukin-6 (IQR) – pg/mL | 1056 | 34 (14 - 75)       | 710  | 11 (4 - 26)        | <0.001 |
| Fibrinogen (IQR) – mg/dL    | 1552 | 624 (491 - 750)    | 1040 | 536 (434 - 652)    | <0.001 |
| Ferritin (IQR) – ng/mL      | 1969 | 716 (335 - 1498)   | 1637 | 510 (230 - 1094)   | <0.001 |

COPD = Chronic obstructive pulmonary disease; DBP = Diastolic blood pressure; HR = Heart rate; IQR = Interquartile range; SBP = Systolic blood pressure. \* Troponin T was available only until June 2020, Troponin I was available only after June 2020.

## Supplemental References

1. Wu Z, McGoogan JM. Characteristics of and Important Lessons From the Coronavirus Disease 2019 (COVID-19) Outbreak in China: Summary of a Report of 72 314 Cases From the Chinese Center for Disease Control and Prevention. *Jama* 2020;323:1239-42.
2. Williamson EJ, Walker AJ, Bhaskaran K, et al. Factors associated with COVID-19-related death using OpenSAFELY. *Nature* 2020;584:430-6.
3. Tartof SY, Qian L, Hong V, et al. Obesity and Mortality Among Patients Diagnosed With COVID-19: Results From an Integrated Health Care Organization. *Ann Intern Med* 2020;173:773-81.

For peer review only

STROBE Statement—Checklist of items that should be included in reports of *cohort studies*

|                              | Item No | Recommendation                                                                                                                                                                                                                                                                                                         | Page No         |
|------------------------------|---------|------------------------------------------------------------------------------------------------------------------------------------------------------------------------------------------------------------------------------------------------------------------------------------------------------------------------|-----------------|
| <b>Title and abstract</b>    | 1       | (a) Indicate the study's design with a commonly used term in the title or the abstract                                                                                                                                                                                                                                 | 1               |
|                              |         | (b) Provide in the abstract an informative and balanced summary of what was done and what was found                                                                                                                                                                                                                    | 2               |
| <b>Introduction</b>          |         |                                                                                                                                                                                                                                                                                                                        |                 |
| Background/rationale         | 2       | Explain the scientific background and rationale for the investigation being reported                                                                                                                                                                                                                                   | 4               |
| Objectives                   | 3       | State specific objectives, including any prespecified hypotheses                                                                                                                                                                                                                                                       | 4               |
| <b>Methods</b>               |         |                                                                                                                                                                                                                                                                                                                        |                 |
| Study design                 | 4       | Present key elements of study design early in the paper                                                                                                                                                                                                                                                                | 4-5             |
| Setting                      | 5       | Describe the setting, locations, and relevant dates, including periods of recruitment, exposure, follow-up, and data collection                                                                                                                                                                                        | 4-5             |
| Participants                 | 6       | (a) Give the eligibility criteria, and the sources and methods of selection of participants. Describe methods of follow-up<br>(b) For matched studies, give matching criteria and number of exposed and unexposed                                                                                                      | 4-5             |
| Variables                    | 7       | Clearly define all outcomes, exposures, predictors, potential confounders, and effect modifiers. Give diagnostic criteria, if applicable                                                                                                                                                                               | 5<br>Supp       |
| Data sources/<br>measurement | 8*      | For each variable of interest, give sources of data and details of methods of assessment (measurement). Describe comparability of assessment methods if there is more than one group                                                                                                                                   | 4-5             |
| Bias                         | 9       | Describe any efforts to address potential sources of bias                                                                                                                                                                                                                                                              | 12-<br>13       |
| Study size                   | 10      | Explain how the study size was arrived at                                                                                                                                                                                                                                                                              | 4-5             |
| Quantitative variables       | 11      | Explain how quantitative variables were handled in the analyses. If applicable, describe which groupings were chosen and why                                                                                                                                                                                           | 4-5             |
| Statistical methods          | 12      | (a) Describe all statistical methods, including those used to control for confounding<br>(b) Describe any methods used to examine subgroups and interactions<br>(c) Explain how missing data were addressed<br>(d) If applicable, explain how loss to follow-up was addressed<br>(e) Describe any sensitivity analyses | 5-6<br><br>Supp |
| <b>Results</b>               |         |                                                                                                                                                                                                                                                                                                                        |                 |
| Participants                 | 13*     | (a) Report numbers of individuals at each stage of study—eg numbers potentially eligible, examined for eligibility, confirmed eligible, included in the study, completing follow-up, and analysed<br>(b) Give reasons for non-participation at each stage<br>(c) Consider use of a flow diagram                        | 6-7             |
| Descriptive data             | 14*     | (a) Give characteristics of study participants (eg demographic, clinical, social) and information on exposures and potential confounders<br>(b) Indicate number of participants with missing data for each variable of interest<br>(c) Summarise follow-up time (eg, average and total amount)                         | 6-9             |
| Outcome data                 | 15*     | Report numbers of outcome events or summary measures over time                                                                                                                                                                                                                                                         | 8-9             |

|    |                          |    |                                                                                                                                                                                                              |       |
|----|--------------------------|----|--------------------------------------------------------------------------------------------------------------------------------------------------------------------------------------------------------------|-------|
| 1  | Main results             | 16 | (a) Give unadjusted estimates and, if applicable, confounder-adjusted estimates and their precision (eg, 95% confidence interval). Make clear which confounders were adjusted for and why they were included | 6-9   |
| 2  |                          |    | (b) Report category boundaries when continuous variables were categorized                                                                                                                                    |       |
| 3  |                          |    | (c) If relevant, consider translating estimates of relative risk into absolute risk for a meaningful time period                                                                                             |       |
| 4  | Other analyses           | 17 | Report other analyses done—eg analyses of subgroups and interactions, and sensitivity analyses                                                                                                               | 9     |
| 5  | <b>Discussion</b>        |    |                                                                                                                                                                                                              |       |
| 6  | Key results              | 18 | Summarise key results with reference to study objectives                                                                                                                                                     | 9     |
| 7  | Limitations              | 19 | Discuss limitations of the study, taking into account sources of potential bias or imprecision. Discuss both direction and magnitude of any potential bias                                                   | 12-13 |
| 8  | Interpretation           | 20 | Give a cautious overall interpretation of results considering objectives, limitations, multiplicity of analyses, results from similar studies, and other relevant evidence                                   | 9-11  |
| 9  | Generalisability         | 21 | Discuss the generalisability (external validity) of the study results                                                                                                                                        | 14    |
| 10 | <b>Other information</b> |    |                                                                                                                                                                                                              |       |
| 11 | Funding                  | 22 | Give the source of funding and the role of the funders for the present study and, if applicable, for the original study on which the present article is based                                                | 15    |

\*Give information separately for exposed and unexposed groups.

**Note:** An Explanation and Elaboration article discusses each checklist item and gives methodological background and published examples of transparent reporting. The STROBE checklist is best used in conjunction with this article (freely available on the Web sites of PLoS Medicine at <http://www.plosmedicine.org/>, Annals of Internal Medicine at <http://www.annals.org/>, and Epidemiology at <http://www.epidem.com/>). Information on the STROBE Initiative is available at <http://www.strobe-statement.org>.

# BMJ Open

## Impact of COVID-19 Pandemic Management on Outcomes in a Large United States Hospital Center

|                                 |                                                                                                                                                                                                                                                                                                                                                                                                                                                                                                                                                                                                                                |
|---------------------------------|--------------------------------------------------------------------------------------------------------------------------------------------------------------------------------------------------------------------------------------------------------------------------------------------------------------------------------------------------------------------------------------------------------------------------------------------------------------------------------------------------------------------------------------------------------------------------------------------------------------------------------|
| Journal:                        | <i>BMJ Open</i>                                                                                                                                                                                                                                                                                                                                                                                                                                                                                                                                                                                                                |
| Manuscript ID                   | bmjopen-2021-058171.R1                                                                                                                                                                                                                                                                                                                                                                                                                                                                                                                                                                                                         |
| Article Type:                   | Original research                                                                                                                                                                                                                                                                                                                                                                                                                                                                                                                                                                                                              |
| Date Submitted by the Author:   | 22-Dec-2021                                                                                                                                                                                                                                                                                                                                                                                                                                                                                                                                                                                                                    |
| Complete List of Authors:       | Castagna, Francesco; Montefiore Medical Center, Xue, Xiaonan; Albert Einstein College of Medicine, Department of Epidemiology and Population Health<br>Saeed, O; Albert Einstein College of Medicine<br>Kataria, Rachna ; Albert Einstein College of Medicine<br>Puius, Yoram; Albert Einstein College of Medicine<br>Patel, Snehal; Albert Einstein College of Medicine<br>Garcia, Mario; Albert Einstein College of Medicine<br>Racine, Andrew D. ; Albert Einstein College of Medicine, Department of Pediatrics<br>Sims, Daniel; Albert Einstein College of Medicine<br>Jorde, Ulrich; Albert Einstein College of Medicine |
| <b>Primary Subject Heading</b>: | Public health                                                                                                                                                                                                                                                                                                                                                                                                                                                                                                                                                                                                                  |
| Secondary Subject Heading:      | Health policy, Infectious diseases, Public health                                                                                                                                                                                                                                                                                                                                                                                                                                                                                                                                                                              |
| Keywords:                       | COVID-19, Public health < INFECTIOUS DISEASES, EPIDEMIOLOGY                                                                                                                                                                                                                                                                                                                                                                                                                                                                                                                                                                    |
|                                 |                                                                                                                                                                                                                                                                                                                                                                                                                                                                                                                                                                                                                                |

SCHOLARONE™  
Manuscripts



I, the Submitting Author has the right to grant and does grant on behalf of all authors of the Work (as defined in the below author licence), an exclusive licence and/or a non-exclusive licence for contributions from authors who are: i) UK Crown employees; ii) where BMJ has agreed a CC-BY licence shall apply, and/or iii) in accordance with the terms applicable for US Federal Government officers or employees acting as part of their official duties; on a worldwide, perpetual, irrevocable, royalty-free basis to BMJ Publishing Group Ltd ("BMJ") its licensees and where the relevant Journal is co-owned by BMJ to the co-owners of the Journal, to publish the Work in this journal and any other BMJ products and to exploit all rights, as set out in our [licence](#).

The Submitting Author accepts and understands that any supply made under these terms is made by BMJ to the Submitting Author unless you are acting as an employee on behalf of your employer or a postgraduate student of an affiliated institution which is paying any applicable article publishing charge ("APC") for Open Access articles. Where the Submitting Author wishes to make the Work available on an Open Access basis (and intends to pay the relevant APC), the terms of reuse of such Open Access shall be governed by a Creative Commons licence – details of these licences and which [Creative Commons](#) licence will apply to this Work are set out in our licence referred to above.

Other than as permitted in any relevant BMJ Author's Self Archiving Policies, I confirm this Work has not been accepted for publication elsewhere, is not being considered for publication elsewhere and does not duplicate material already published. I confirm all authors consent to publication of this Work and authorise the granting of this licence.



# Impact of COVID-19 Pandemic Management on Outcomes in a Large United States Hospital Center

Francesco Castagna MD<sup>1</sup>, Xiaonan Xue PhD<sup>2</sup>, Omar Saeed MD<sup>1</sup>, Rachna Kataria MD<sup>1</sup>, Yoram A Puius MD PhD<sup>3</sup>, Snehal R Patel MD<sup>1</sup>, Mario J Garcia MD<sup>1</sup>, Andrew D Racine MD<sup>4</sup>, Daniel B Sims MD<sup>1</sup>, Ulrich P Jorde MD<sup>1</sup>

## Affiliations:

<sup>1</sup> Division of Cardiology, Montefiore Medical Center and Albert Einstein College of Medicine, Bronx, NY

<sup>2</sup> Department of Epidemiology and Population Health, Albert Einstein College of Medicine, Bronx, NY

<sup>3</sup> Division of Infectious Diseases, Montefiore Medical Center and Albert Einstein College of Medicine, Bronx, NY

<sup>4</sup> Department of Pediatrics, Montefiore Medical Center and Albert Einstein College of Medicine, Bronx, New York.

Word count: 3,064

## Corresponding Author:

Ulrich P. Jorde, MD  
Professor of Medicine

Division of Cardiology  
Department of Medicine  
Montefiore Medical Center  
3400 Bainbridge Ave. 7<sup>th</sup> floor  
Bronx, NY  
Email: [ujorde@montefiore.org](mailto:ujorde@montefiore.org)

## 28 **Abstract**

29 **Introduction:** COVID-19 first struck New York City in the spring of 2020 resulting in an  
30 unprecedented strain on our health care system triggering multiple changes in public health  
31 policy governing hospital operations as well as therapeutic approaches to COVID-19. We  
32 examined inpatient mortality at our center throughout the course of the pandemic.

33 **Methods:** Retrospective chart review of clinical characteristics, treatments, and outcome data of  
34 all patients admitted with COVID-19 from March 1<sup>st</sup>, 2020 to February 28<sup>th</sup>, 2021. Patients were  
35 grouped into three-month quartiles. Hospital strain was assessed as percent of occupied beds  
36 based on a normal bed capacity of 1,491.

37 **Results:** Inpatient mortality decreased from 25.0% in spring to 10.8% over the course of the  
38 year. During this time, the use of remdesivir, steroids, and anticoagulants increased; the use of  
39 hydroxychloroquine and other antibiotics decreased. Daily bed occupancy ranged from 62% to  
40 118% occupancy. In a multivariate model with all year's data controlling for demographics,  
41 comorbidities, and acuity of illness, bed occupancy was associated with an increased COVID-19  
42 mortality. Yet further adjustment of bed occupancy showed a significant lower mortality rate  
43 during the second surge compared to the initial surge (HR 0.520, CI 0.448-0.604,  $p < 0.001$ ).  
44 Propensity score analysis confirmed this difference in these two seasons (HR 0.580 CI: 0.507-  
45 0.663,  $p < 0.001$ ).

46 **Conclusion:** Inpatient mortality from COVID-19 decreased to a degree disproportionate to  
47 advances in disease specific therapeutics and was associated with bed occupancy. Early  
48 reduction in epicenter hospital bed occupancy to accommodate acutely ill and resource-intensive  
49 patients should be a critical component in the strategic planning for future pandemics.

1  
2  
3 50 **Strengths and limitations of this study**  
4  
5

- 6 51 • Large cohort study (7,390 COVID-19 patients).  
7  
8 52 • Longitudinal analysis over 1 year of management and hospital policy changes.  
9  
10  
11 53 • Analysis of mortality changes after adjustment for different therapies and clinical  
12  
13 54 parameters.  
14  
15 55 • Identification of the association between level of hospital system stress and mortality,  
16  
17 with important public health ramifications.  
18 56  
19  
20 57 • Limitation: data on most recent variants are not included  
21  
22  
23 58  
24  
25  
26  
27  
28  
29  
30  
31  
32  
33  
34  
35  
36  
37  
38  
39  
40  
41  
42  
43  
44  
45  
46  
47  
48  
49  
50  
51  
52  
53  
54  
55  
56  
57  
58  
59  
60

## 59 INTRODUCTION

60 Coronavirus disease 2019 (COVID-19) was declared a global pandemic by the World Health  
61 Organization on March 11<sup>th</sup>, 2020.<sup>1</sup> In the United States, after a cluster of cases reported from  
62 Washington state<sup>2</sup>, New York state quickly became the initial epicenter of this pandemic with  
63 over 1.27 million of cases till date and over 50,000 fatalities with the highest concentration in the  
64 Bronx and Queens boroughs of New York City.<sup>3</sup> Montefiore Einstein, with its three principal  
65 teaching hospitals and combined adult bed capacity of 1,491, is the primary health care provider  
66 for the large, nearly 1.5 million diverse population of the Bronx<sup>4</sup> and experienced a “first wave”  
67 of COVID-19 admissions in the spring of 2020<sup>3</sup>, followed by a significant reduction of cases  
68 until a second surge in hospitalizations was noted in the winter of 2020. Throughout the course  
69 of the year, multiple public health measures - including those adapting hospital operation to a  
70 disaster level pandemic, such as cancellation of all elective procedures and waiver of state  
71 specific licensing for health care providers - were put in place. In addition, the understanding of  
72 COVID-19 pathophysiology improved<sup>5,6</sup>, new treatments were developed<sup>7-10</sup>, parts of the  
73 general population<sup>11,12</sup> as well as hospital personnel developed antibodies after COVID-19  
74 illness<sup>13</sup>, and our hospital system adapted to and then recovered from crisis mode.<sup>14</sup> Here, we  
75 report outcomes of patients hospitalized with COVID-19 through one year since the first case,  
76 focusing on the differences observed between the spring and the winter surges.

## 78 METHODS:

### 79 Study Population

80 We retrospectively reviewed all adult patients admitted to Montefiore Medical Center with a real  
81 time reverse transcription polymerase chain reaction (RT-PCR) assay positive for COVID-19

1  
2  
3 82 between March 1, 2020 and February 28, 2021. We divided this timeframe in four 3-month  
4  
5 83 seasons based on northern hemisphere calendar: spring (March 1, 2020 to May 31, 2020),  
6  
7 84 summer (June 1, 2020 to August 30, 2020), fall (September 1, 2020 to November 30, 2020), and  
8  
9 85 winter (December 1, 2020 to February 28, 2021).  
10  
11  
12 86

## 14 87 **Data Collection**

15  
16  
17 88 Medical data including demographic, clinical, and laboratory variables were extracted from the  
18  
19 89 electronic medical record system. The primary outcome was 30-day in-hospital mortality.  
20  
21  
22 90

## 23 91 **Statistical Analysis**

24  
25  
26 92 Continuous variables are displayed as mean  $\pm$  standard deviation or median [25-75%  
27  
28 93 interquartile range] and compared with the Student's t-test, or Wilcoxon ranks-sum, as  
29  
30  
31 94 appropriate. Categorical data are presented as percent and compared by the chi-squared test. We  
32  
33 95 estimated the cumulative incidence of the primary endpoint in-hospital mortality for each season,  
34  
35 96 treating hospital discharge as a competing event.<sup>15</sup> To avoid any bias due to differential follow-  
36  
37 97 up length, we censored the follow-up time at 30 days after the admission.

38  
39  
40 98 A multivariable competing risk proportional hazard models was used to estimate the sub-  
41  
42 99 distribution hazard ratios<sup>16 17</sup> for time to in-hospital death. The covariates in the multivariable  
43  
44  
45 100 analyses included factors present in > 90% of our dataset, known to be associated with in-  
46  
47 101 hospital COVID-19 mortality based on prior literature<sup>6 18 19</sup>, or with a univariate association with  
48  
49 102 in-hospital mortality ( $p < 0.05$ ) and a clinical (relative difference >5%) difference between  
50  
51 103 survivors and non survivors (**Supplemental Table 1**). These variables included: age, sex, body  
52  
53  
54 104 mass index (BMI), vital signs at presentation (temperature, systolic and diastolic blood pressure,  
55  
56  
57  
58  
59  
60

1  
2  
3 105 heart rate, respiratory rate, pulse oxygen saturation), platelet count, white cell count, potassium,  
4  
5 106 bicarbonate, creatinine, glucose, alanine transaminase, aspartate transaminase, history of  
6  
7 107 hypertension, dyslipidemia, chronic kidney disease (CKD), heart failure, coronary artery disease,  
8  
9  
10 108 asthma/chronic obstructive pulmonary disease, diabetes mellitus and statin use. Additionally,  
11  
12 109 lactic acid level and percent of hospital bed saturation were forced into the model as marker of  
13  
14  
15 110 illness severity and level of hospital stress, respectively.  
16  
17

18 111  
19  
20 112 Then we focused on examining the difference in in-hospital death between patients admitted in  
21  
22 113 the spring and in the winter, as they represented the two largest and most temporal distant waves  
23  
24 114 of the COVID-19 pandemic occurring before and after public health polices, specific therapeutic  
25  
26 115 approaches and hospital management changes had been implemented. Selection method for  
27  
28  
29 116 covariates is presented in the **Supplemental Material** and **Supplemental Table 2**.

30  
31 117 The proportionality assumption was examined<sup>20</sup> and no violation was identified. A two-sided  
32  
33  
34 118  $p < 0.05$  was considered statistically significant.  
35

36 119

### 38 120 **Propensity Score Analysis**

39  
40  
41 121 To fully control the potential differences in patient population and hospital stress between spring  
42  
43 122 and winter COVID-19 patients, we also used propensity score (PS) matching to compare the 30-  
44  
45 123 day in-hospital mortality between spring and winter admissions. The same covariates used for  
46  
47 124 the multivariable competing risk regression were used for PS matching. PS matching was carried  
48  
49  
50 125 out through a 1:1 greedy matching algorithm, with a caliper width of 0.1 SD. We then stratified  
51  
52 126 on matched pair in the competing risk regression model.<sup>21 22</sup> Because one-to-one matching led to  
53  
54 127 a reduction in sample size, we used this analysis as a sensitivity analysis.  
55  
56  
57  
58  
59  
60

1  
2  
3 128 All statistical analyses was performed with SPSS (IBM Corp, ver. 25, Armonk, NY) and the R  
4  
5 129 packages cmprsk and crrSC (R Foundation for Statistical Computing, ver 3.5)  
6  
7

8 130

### 10 131 **Patient and Public Involvement**

11  
12 132 Given the retrospective nature of our analysis, it was not appropriate or possible to involve  
13  
14 133 patients or the public in the design, or conduct, or reporting, or dissemination plans of our  
15  
16 134 research.  
17  
18

19 135

### 21 136 **RESULTS**

22  
23  
24 137 7,390 COVID-19 positive adult patients were admitted between March 1, 2020 and February 28,  
25  
26 138 2021 (**Figure 1**). 4,495 patients were admitted during the spring, 264 during the summer, 377  
27  
28 139 during the fall, and 2,254 during the winter.

29  
30  
31 140 On April 8, 2020, peak of the spring season, the total numbers of simultaneously adult patients  
32  
33 141 admitted to our hospital (including those admitted to emergency adult wards at our children's  
34  
35 142 hospital<sup>23</sup>) was 1,762 (118% of nominal bed capacity); 1,201 of them (68.2%) were COVID-19  
36  
37 143 patients. On February 8, 2021, peak of winter season, 1,512 patients (101% of nominal bed  
38  
39 144 capacity) were admitted to our hospital and 393 of them (26.0%) were COVID-19 patients.

40  
41  
42 145 (**Figure 1**). Following cancellation of elective procedures, bed occupancy decreased to 70% by  
43  
44 146 the end of the spring season and remained at 90% until the beginning of the winter season, when  
45  
46 147 the second wave occurred in December 2020. Unadjusted mortality for patient admitted at the  
47  
48 148 beginning of spring, end of spring, beginning of winter, and end of winter was 28%, 8%, 14%,  
49  
50 149 and 13%, respectively (**Figure 2**).  
51  
52

53  
54 150  
55  
56  
57  
58  
59  
60

## 151 **Patient Population**

152 Demographics, past medical history, vital signs at arrivals, and initial laboratory blood tests are  
153 presented in **Table 1**. Overall, median age was 66 (55 – 77) years, 3,835 (51.9%) patients were  
154 male, 5,519 (74.2%) were of Black race and/or Hispanic ethnicity. Median age ranged from 63  
155 years (fall) to 67 years (spring). Sex distribution was similar throughout the year. Summer and  
156 fall patients had the lowest and the highest BMI: 26.7 and 28.6 kg/m<sup>2</sup>, respectively.

## 158 **Pharmacotherapy**

159 Changes in pharmacological approach is presented in **Supplemental Table 3** and **Figure 3**.  
160 Spring patients were more likely to receive hydroxychloroquine, azithromycin and other  
161 antibiotics. The use of Remdesivir substantially increased throughout the year (from less than 2%  
162 during spring to almost 70% by the end of the winter). Steroids prescription (from 33% during  
163 spring to almost 70% in February 2021), therapeutic anticoagulation therapy, as well as use of  
164 statins, angiotensin converting inhibitors (ACE-I), or angiotensin receptor blockers (ARBs) also  
165 increased.

## 167 **Death, Intubation, and Length of Stay**

168 Over the course of a year, 1,437 (19.4%) died while hospitalized. Patients who died were older,  
169 had more comorbidities, and were more acutely ill consistent within prior reports on risk factors  
170 for death in COVID-19<sup>5 6</sup> (**Supplemental Table 1**). Average unadjusted monthly mortality is  
171 presented in **Figure 2**. 30-day in-hospital mortality (**Figure 4A**) was 25.0% for the spring  
172 patients, 11.0% for summer patients, 6.9% for fall patients, and 11.4% for winter patients  
173 (p<0.001). On average, spring patients died 6.4 (3.2 – 12.9) days after the arrival to the



1  
2  
3 174 emergency department, summer patients 7.2 (3.0 – 15.7) days after the arrival, fall patients 13.4  
4  
5 175 (8.7 – 21.6) days after arrival, and winter patients 13.3 (6.8 – 20.7) days after the arrival  
6  
7 176 ( $p < 0.001$ ). Frequency of invasive ventilatory support was higher during the spring with 892  
8  
9 177 patients (19.4%) intubated, versus 27 (10.2%) in the summer, 36 (9.5%) during fall, and 268  
10  
11 178 (11.9%) in the winter,  $p < 0.001$ . Median time from arrival-to-intubation was 0.7 (0.1 - 4.1) days  
12  
13 179 for spring patients, 0.6 (0.1 - 8.1) days for summer patients, 2.2 (0.1 – 7.3) days for fall patients,  
14  
15 180 and 2.8 (0.3 – 7.0) days for winter patients,  $p < 0.001$ . Median length of stay was 6.1 (3.5 – 11.1)  
16  
17 181 days during spring, 5.1 (2.7 – 10.1) days during summer, 5.0 (3.0 – 10.1) days during fall, and  
18  
19 182 6.3 (3.8 – 12.0) days during winter,  $p < 0.001$ .  
20  
21  
22  
23  
24  
25

### 26 184 **Bed Saturation and Mortality**

27  
28 185 We defined bed saturation the percentage of bed occupancy calculated from the ratio between the  
29  
30 186 number of admitted patients over the nominal bed capacity of our institution (1,491).

31  
32  
33 187 In the multivariable competing risk proportional hazard model of the entire cohort, percent of  
34  
35 188 bed occupancy was associated with increased 30-day in-hospital mortality (HR 1.007, CI: 1.001,  
36  
37 189 1.013,  $p = 0.004$ ); i.e mortality increase by 0.7 % for each 1% increase of bed occupancy.

38  
39 190 Consistent results were observed per level increase in bed occupancy quartile, (HR 1.086 [1.026  
40  
41 -1.148], P-value for linear trend = 0.004). Results of the competing risk regression analysis are  
42  
43 191 presented in the **Table 2**.  
44  
45  
46

### 47 193 48 49 194 **Spring vs Winter Mortality Comparison and Propensity Matched Analysis**

50  
51 195 In the multivariable competing risk proportional hazard model comparing spring and winter  
52  
53 196 season, 30-day in-hospital mortality was lower in winter (HR 0.520, CI 0.448-0.604,  $p < 0.001$ )  
54  
55  
56  
57  
58  
59  
60

1  
2  
3 197 when compared to spring. After PS caliper matching, there were 1,722 matched pairs. Spring and  
4  
5 198 winter patients had similar distribution of PS (**Supplemental Figure 1**) and standardized average  
6  
7 199 difference among covariates was greatly reduced. PS analysis showed a significant reduction of  
8  
9 200 in-hospital mortality during winter (HR 0.580 CI: 0.507-0.663,  $p < 0.001$ ) confirming what we  
10  
11 201 observed in the multivariable adjusted analysis (**Figure 4B**).

12  
13  
14  
15 202

## 16 17 203 **DISCUSSION**

18  
19 204 We examined inpatient mortality from COVID-19 over the course of a one-year pandemic at our  
20  
21 205 hospital system in New York City. Our principal findings are as follows: First, we observed a  
22  
23 206 substantial reduction of in-hospital mortality coinciding with multiple pandemic related public  
24  
25 207 health measures focusing on hospital resources on COVID-19 – and preceding comprehensive  
26  
27 208 changes in pharmacotherapy - towards the end of the first surge. Second, we describe - for the  
28  
29 209 first time - hospital bed occupancy as an independent risk factor for inpatient mortality from  
30  
31 210 COVID-19.

32  
33  
34  
35 211

### 36 37 212 **Public Health Measures in Response to COVID-19**

38  
39 213 After declaring a state of disaster emergency (March 7, 2020), New York State introduced  
40  
41 214 different measures to limit the spread of the disease, including public schools closure (March 16,  
42  
43 215 2020), limitation of indoor dining (March 17, 2020), stay-home order for non-essential workers  
44  
45 216 (March 22, 2020), mandatory face coverings in public (April 15, 2020), and night subway  
46  
47 217 closure (April 30, 2020)<sup>24</sup>. Despite these measures to limit the diffusion of the disease and a  
48  
49 218 generalized reduction of movements around New York City (as evidenced by a more than 90%  
50  
51 219 reduction of subway ridership compared to 2019)<sup>25</sup>, more than 30% of Bronx residents were

1  
2  
3 220 found to have positive antibodies (and thus possibly temporary immunity) against SARS-CoV-2  
4  
5 221 in August 2020.<sup>26</sup>  
6  
7  
8 222 Specifically relevant to hospital operations, executive order no. 202.5 (March 16, 2020)<sup>27</sup>  
9  
10 223 allowed healthcare providers not licensed or registered in New York State to temporarily work in  
11  
12 224 the State, and executive order no. 202.10 (March 22, 2020)<sup>27</sup> suspended elective operations.  
13  
14 225 These executive orders were associated with a dramatic drop in non-COVID-19 admissions at  
15  
16 226 our institution beginning March 16, 2020. (**Figure 1**). On March 26, 2020 New York State  
17  
18 227 Governor Cuomo additionally mandated all hospitals to increase their bed capacity by 50% to  
19  
20 228 accommodate the surge of COVID-19 patients.<sup>27</sup> Despite this order, the actual bed occupancy at  
21  
22 229 our institution (while accommodating all COVID-19 patients presenting to our hospitals)  
23  
24 230 remained below the usual operating capacity until December 2020.  
25  
26  
27 231 Notably, COVID-19 mortality remained stable throughout the summer and fall 2020 with low  
28  
29 232 case counts and increased utilization of steroids, anticoagulation, and remdesivir. Although  
30  
31 233 randomized controlled trials have shown morbidity benefits with the use of remdesivir<sup>7</sup> and  
32  
33 234 mortality reduction with steroids<sup>8</sup>, the magnitude of these effects cannot explain the more than  
34  
35 235 50% reduction in mortality we observed. Furthermore, pharmacotherapy, with the exception of  
36  
37 236 hydroxychloroquine elimination, did not materially change within the spring season, by the end  
38  
39 237 of which mortality was already decreased. Steroid, remdesivir, and therapeutic anticoagulation  
40  
41 238 were used in 10-20% of patients by May 2020, but they reached 30-70% only in the winter  
42  
43 239 season. Despite that, unadjusted mortality began to increase again in December 2020 during the  
44  
45 240 second wave. Of note, bed occupancy also increased at that time and proved to be an  
46  
47 241 independent risk factor for COVID-19 mortality in our cohort of nearly 8,000 patients.  
48  
49  
50  
51  
52  
53  
54  
55  
56  
57  
58  
59  
60

### 243 **Change in Therapeutic Approach**

244 The initial widespread (>2/3 of first spring patients) use of hydroxychloroquine, an agent  
245 eventually proven to be ineffective<sup>28</sup> to treat COVID-19, probably represents the most obvious  
246 pandemic-associated deviation from the usual multiphase clinical trial standards of therapeutic  
247 paradigm development. Only 8 of 2,254 patients received hydroxychloroquine during the winter  
248 wave. Similarly, we observed a reduction in the use of azithromycin and other antibiotics, the  
249 latter possibly reflecting a more careful assessment of the need to treat superimposed bacterial  
250 infections during the second wave. Steroid therapy<sup>8,29</sup> and therapeutic anticoagulation<sup>9</sup> were  
251 implemented in the majority of patients during the winter after the knowledge on the likely  
252 disease modulating inflammatory properties and pro-thrombotic effect of COVID-19 had been  
253 recognized<sup>30</sup> and, in the case of steroids, a therapeutic effect had been proven<sup>8</sup>. Remdesivir, an  
254 inhibitor of the viral RNA-dependent RNA polymerase that showed shortening of recovery time  
255 in hospitalized patients with COVID-19<sup>7</sup>, received emergency FDA approval on October  
256 22<sup>nd</sup>, 2020<sup>31</sup> and was administered to almost half of the admitted patients during the winter. If  
257 initial concerns of possible interactions between ACE-I or ARBs and SARS-CoV-2<sup>32</sup> led to a  
258 possible underutilization or discontinuation of these drugs during the spring, we observed a  
259 significant increase in their use during the following months, after no increased risks were  
260 reported.<sup>33,34</sup>

261 Similarly, after several reports showed a possible protective effect associated with the use of  
262 statins<sup>35,36</sup>, their utilization markedly increased during the winter.

263 Lastly, after the spring wave provided anecdotal evidence for early proning in COVID-19  
264 pneumonia, an approach strongly favoring noninvasive ventilation and avoiding intubation was  
265 developed to address respiratory distress in COVID-19; more data about such an approach has

1  
2  
3 266 since accumulated.<sup>10 37</sup> The cumulative effect of these therapeutic changes, in combination with  
4  
5 267 a better preparedness to respond to a pandemic, can be estimate from the different mortality  
6  
7 268 between the first surge (spring) and the second surge (winter). After matching the two groups for  
8  
9 269 demographic and clinical variables, as well as for elements indicative of hospital distress (bed  
10  
11 270 occupancy), a significant reduction of mortality was observed during the winter trimester.  
12  
13  
14  
15 271

### 16 17 272 **Change in Hospital Stress Load**

18  
19 273 At the peak of the pandemic, the hospital saturation reached the 118% of the nominal bed  
20  
21 274 capacity and COVID-19 patients accounted for 68.2% of all admitted patients. This increase in  
22  
23 275 acutely ill patients created significant excess demand on the rest of the hospital infrastructure  
24  
25 276 best characterized by the surge in the need for intensive care unit (ICU) beds and transformation  
26  
27 277 of other hospital areas to ICUs.<sup>14 23</sup> Despite increased patient load, the number of standard ICU  
28  
29 278 beds, as well as laboratories, diagnostic equipment, and available personnel, remained the same  
30  
31 279 as before the pandemic. This unmatched patient overload resulted in a 0.7 % mortality increase  
32  
33 280 for each 1% increment in hospital bed saturation. In light of these results, strategies to minimize  
34  
35 281 the bed occupancy for non-Covid-19 patients or non-life-saving admission should be adopted to  
36  
37 282 diverge resources to improve the outcome of admitted Covid-19 patients.  
38  
39  
40  
41  
42  
43

### 44 284 **Limitations**

45  
46 285 Our study has the shortcomings of a retrospective investigation, but there are some very specific  
47  
48 286 aspects limiting the interpretation of our results. First, it is difficult to assess the true effects of  
49  
50 287 pharmacotherapy given the dynamic changes in indications, doses, and usage that happened over  
51  
52 288 the course of the year. Regardless, we believe the propensity-matched comparison between the  
53  
54  
55  
56  
57  
58  
59  
60

1  
2  
3 289 spring and the winter waves provides compelling evidence for the validity of our principal  
4  
5 290 observation of inpatient COVID-19 mortality reduction disproportionate to advances in  
6  
7 291 pharmacotherapy. We chose total bed occupancy as a metric for hospital stress assuming that  
8  
9 292 other resources per bed remained static. Notably, the ratio of COVID-19 to non-COVID-19  
10  
11 293 patients, ICU bed saturation, and staff shortages are unaccounted for in this model. Regrettably,  
12  
13 294 an in-depth analysis of these metrics is beyond our ability in this retrospective pandemic analysis  
14  
15 295 with disaster elements. Additionally, a significant number of patients received ICU-level-of-care  
16  
17 296 interventions (mechanical ventilatory support, dialysis, vasopressors titration) on regular floors;  
18  
19 297 therefore, the concept of ICU bed saturation might have been not truly representative of the  
20  
21 298 burden.

22  
23  
24  
25  
26 299 However, we feel our data is sufficiently strong to support the notion that bed capacity expansion  
27  
28 300 alone is not the answer. Rather, a smaller number of beds with higher staffing accomplished by  
29  
30 301 drastic reductions in all non-emergent procedures and activities is likely a better approach.

31  
32  
33 302 Although offering fewer beds in pandemic situation appears initially quite counterintuitive, in  
34  
35 303 practice we observed that mortality began to decrease once beds and resources were allocated  
36  
37 304 specifically to COVID-19 patients by executive orders 202.5 and 202.10; and most importantly  
38  
39 305 that bed occupancy never exceeded 100% once hospital operations focused on the COVID-19  
40  
41 306 pandemic only. It is conceivable that an uptrend in mortality observed late in the pandemic with  
42  
43 307 established treatment paradigms could be due to new viral strains or a sicker patient population.

44  
45 308 Although we are unable to provide detailed strain analysis for our study population, a meaningful  
46  
47 309 numbers of new (and possibly more virulent) strains were not yet observed in in the Bronx,  
48  
49 310 where our study was conducted.<sup>38</sup> The small sample size of patients in summer and fall does not  
50  
51 311 allow meaningful propensity matched comparisons, and when comparing summer, fall, and  
52  
53  
54  
55  
56  
57  
58  
59  
60

1  
2  
3 312 winter populations, there do not appear to be clinically meaningful differences. Lastly, single-  
4  
5 313 patient data on vaccination status were not available. At the conclusion of the study, only 13.8%  
6  
7 314 of the population of New York State received at least one dose and 7.4% received two doses<sup>39</sup>.  
8  
9 315 Given the heterogeneous distribution of vaccination within the state (and the city of New York),  
10  
11 316 it is impossible to meaningfully account for these parameters.  
12  
13  
14  
15 317

## 16 318 **CONCLUSIONS**

17  
18  
19 319 Inpatient mortality from COVID-19 decreased to a degree disproportionate to advances in  
20  
21 320 disease specific therapeutics and was associated with bed occupancy. Early reduction in  
22  
23 321 epicenter hospital bed occupancy to accommodate acutely ill and resource-intensive patients  
24  
25 322 should be a critical component in the strategic planning for future pandemics.  
26  
27  
28  
29 323  
30  
31 324

1  
2  
3 **325 DECLARATIONS**  
4

5  
6 **326 Ethics approval and consent to participate**  
7

8  
9 327 The Office of Human Research Affairs at Albert Einstein College of Medicine approved this  
10  
11 328 study (# 2020-11308). Patient consent and HIPAA forms were waived by our IRB due to the  
12  
13  
14 329 retrospective nature of our research.  
15

16  
17 **330 Consent for publication**  
18

19  
20 331 Non applicable.  
21  
22

23 **332 Availability of data and materials**  
24

25  
26 333 The datasets used and/or analyzed during the current study are available from the corresponding  
27  
28 334 author on reasonable request.  
29  
30

31  
32 **335 Competing interests**  
33

34 336 No conflicts of interest exist.  
35  
36

37 **337 Funding/Support**  
38

39 338 Francesco Castagna is supported by a grant from the National Institute for Health  
40  
41 339 (T32HL144456) and the National Center for Advancing Translational Science (NCATS) Clinical  
42  
43 340 and Translational Science Award at Einstein-Montefiore (UL1TR001073). Omar Saeed is  
44  
45 341 supported by grants from the National Institute for Health/National Heart, Lung and Blood  
46  
47 342 Institute (K23HL145140) and the National Center for Advancing Translational Science  
48  
49 343 (NCATS) Clinical and Translational Science Award at Einstein-Montefiore (UL1TR001073).  
50  
51 344 Ulrich Jorde is supported by the McAdam Family Foundation (award number not applicable).  
52  
53  
54  
55  
56  
57  
58  
59  
60



1  
2  
3 345 **Author's Contributions**  
4

5 346 Design of the project: FC, XX, and UPJ.  
6

7 347 Underlying data verified by FC, XX, and UPJ.  
8

9 348 Acquisition, analysis, and interpretation of data: FC, XX, OM, RK, YAP, SRP, MJC, ADR, DS,  
10 349 and UPJ.  
11

12 350 Statistical analysis: FC and XX.  
13

14 351 Obtained funding: UPJ  
15

16 352 Manuscript writing: FC, XX, and UPJ.  
17

18 353 Critical revision of the manuscript for important intellectual content: FC, XX, OM, RK, YAP,  
19 354 SRP, MJC, ADR, DS, and UPJ.  
20

21 355 Supervision: UPJ  
22

23 356 All the Authors reviewed the work and approved the final version.  
24

25 357 FC and UPJ had full access to all the data in the study and take responsibility for the integrity of  
26 358 the data and the accuracy of the data analysis.  
27

28 359  
29

30 360 **Acknowledgements**  
31

32 361 Not applicable  
33

34 362  
35

36 363  
37

37 364  
38

39 365  
40  
41  
42  
43  
44  
45  
46  
47  
48  
49  
50  
51  
52  
53  
54  
55  
56  
57  
58  
59  
60

366 **References**

- 367 1. World Health Organization. WHO Director-General's opening remarks at the media briefing  
368 on COVID-19-11 March 2020: Geneva, Switzerland, 2020.
- 369 2. Bhatraju PK, Ghassemieh BJ, Nichols M, et al. Covid-19 in Critically Ill Patients in the Seattle  
370 Region — Case Series. *New England Journal of Medicine* 2020;382(21):2012-22. doi:  
371 10.1056/NEJMoa2004500
- 372 3. John Hopkins University. COVID-19 Dashboard by the Center for Systems Science and  
373 Engineering (CSSE) at Johns Hopkins University (JHU): JHU; 2020 [Available from:  
374 <https://coronavirus.jhu.edu/map.html> accessed 1/20/2021.
- 375 4. Lozano R, Naghavi M, Foreman K, et al. Global and regional mortality from 235 causes of  
376 death for 20 age groups in 1990 and 2010: a systematic analysis for the Global Burden of  
377 Disease Study 2010. *Lancet* 2012;380(9859):2095-128. doi: 10.1016/S0140-  
378 6736(12)61728-0 [published Online First: 2012/12/19]
- 379 5. Zhou F, Yu T, Du R, et al. Clinical course and risk factors for mortality of adult inpatients  
380 with COVID-19 in Wuhan, China: a retrospective cohort study. *The Lancet*  
381 2020;395(10229):1054-62. doi: 10.1016/S0140-6736(20)30566-3
- 382 6. Wu Z, McGoogan JM. Characteristics of and Important Lessons From the Coronavirus  
383 Disease 2019 (COVID-19) Outbreak in China: Summary of a Report of 72 314 Cases  
384 From the Chinese Center for Disease Control and Prevention. *Jama* 2020;323(13):1239-  
385 42. doi: 10.1001/jama.2020.2648 [published Online First: 2020/02/25]
- 386 7. Beigel JH, Tomashek KM, Dodd LE, et al. Remdesivir for the Treatment of Covid-19 — Final  
387 Report. *New England Journal of Medicine* 2020;383(19):1813-26. doi:  
388 10.1056/NEJMoa2007764
- 389 8. Group RC, Horby P, Lim WS, et al. Dexamethasone in Hospitalized Patients with Covid-19 -  
390 Preliminary Report. *The New England journal of medicine* 2020 doi:  
391 10.1056/NEJMoa2021436 [published Online First: 2020/07/18]
- 392 9. Thachil J, Tang N, Gando S, et al. ISTH interim guidance on recognition and management of  
393 coagulopathy in COVID-19. *Journal of Thrombosis and Haemostasis* 2020;18(5):1023-  
394 26. doi: <https://doi.org/10.1111/jth.14810>
- 395 10. Shelhamer MC, Wesson PD, Solari IL, et al. Prone Positioning in Moderate to Severe Acute  
396 Respiratory Distress Syndrome Due to COVID-19: A Cohort Study and Analysis of  
397 Physiology. *Journal of intensive care medicine* 2021;36(2):241-52. doi:  
398 10.1177/0885066620980399 [published Online First: 2021/01/01]
- 399 11. Rosenberg ES, Tesoriero JM, Rosenthal EM, et al. Cumulative incidence and diagnosis of  
400 SARS-CoV-2 infection in New York. *Annals of epidemiology* 2020;48:23-29.e4. doi:  
401 10.1016/j.annepidem.2020.06.004 [published Online First: 2020/07/11]
- 402 12. Sekine T, Perez-Potti A, Rivera-Ballesteros O, et al. Robust T Cell Immunity in  
403 Convalescent Individuals with Asymptomatic or Mild COVID-19. *Cell* 2020;183(1):158-  
404 68.e14. doi: <https://doi.org/10.1016/j.cell.2020.08.017>
- 405 13. Fill Malfertheiner S, Brandstetter S, Roth S, et al. Immune response to SARS-CoV-2 in  
406 health care workers following a COVID-19 outbreak: A prospective longitudinal study. *J*  
407 *Clin Virol* 2020;130:104575. doi: 10.1016/j.jcv.2020.104575 [published Online First:  
408 2020/08/18]
- 409 14. Alvarez Villela M, Boucher T, Terre J, et al. Surge-in-Place: Conversion of a Cardiac  
410 Catheterization Laboratory Into a COVID-19 Intensive Care Unit and Back Again. *The*  
411 *Journal of invasive cardiology* 2020 [published Online First: 2020/12/22]

- 1  
2  
3 412 15. Putter H, Fiocco M, Geskus RB. Tutorial in biostatistics: competing risks and multi-state  
4 413 models. *Stat Med* 2007;26(11):2389-430. doi: 10.1002/sim.2712 [published Online First:  
5 414 2006/10/13]
- 6  
7 415 16. Gray RJ. A class of K-sample tests for comparing the cumulative incidence of a competing  
8 416 risk. *The Annals of statistics* 1988:1141-54.
- 9 417 17. Fine JP, Gray RJ. A Proportional Hazards Model for the Subdistribution of a Competing  
10 418 Risk. *Journal of the American Statistical Association* 1999;94(446):496-509. doi:  
11 419 10.1080/01621459.1999.10474144
- 12 420 18. Williamson EJ, Walker AJ, Bhaskaran K, et al. Factors associated with COVID-19-related  
13 421 death using OpenSAFELY. *Nature* 2020;584(7821):430-36. doi: 10.1038/s41586-020-  
14 422 2521-4 [published Online First: 2020/07/09]
- 15 423 19. Tartof SY, Qian L, Hong V, et al. Obesity and Mortality Among Patients Diagnosed With  
16 424 COVID-19: Results From an Integrated Health Care Organization. *Annals of internal*  
17 425 *medicine* 2020;173(10):773-81. doi: 10.7326/m20-3742 [published Online First:  
18 426 2020/08/14]
- 19 427 20. Schoenfeld D. Partial residuals for the proportional hazards regression model. *Biometrika*  
20 428 1982;69(1):239-41.
- 21 429 21. Austin PC, Fine JP. Propensity-score matching with competing risks in survival analysis. *Stat*  
22 430 *Med* 2019;38(5):751-77. doi: 10.1002/sim.8008 [published Online First: 2018/10/23]
- 23 431 22. Zhou B, Latouche A, Rocha V, et al. Competing risks regression for stratified data.  
24 432 *Biometrics* 2011;67(2):661-70. doi: 10.1111/j.1541-0420.2010.01493.x [published  
25 433 Online First: 2010/12/16]
- 26 434 23. Philips K, Uong A, Buckenmyer T, et al. Rapid Implementation of an Adult Coronavirus  
27 435 Disease 2019 Unit in a Children's Hospital. *The Journal of pediatrics* 2020;222:22-27.  
28 436 doi: 10.1016/j.jpeds.2020.04.060 [published Online First: 2020/05/08]
- 29 437 24. New York City Office of the Mayor. News: New York City Office of the Mayor; [Available  
30 438 from: <https://www1.nyc.gov/office-of-the-mayor/news.page> accessed 1/17/2021.
- 31 439 25. Metropolitan Transportation Authority. Fare Data: Metropolitan Transportation Authority;  
32 440 [Available from: <http://web.mta.info/developers/fare.html> accessed 1/17/2021.
- 33 441 26. New York City Department of Health and Mental Hygiene. COVID-19: Data: New York  
34 442 City Department of Health and Mental Hygiene; 2021 [New York City Department of  
35 443 Health and Mental Hygiene:[Available from: [https://www1.nyc.gov/site/doh/covid/covid-  
36 444 19-data.page](https://www1.nyc.gov/site/doh/covid/covid-19-data.page) accessed 1/17/2021.
- 37 445 27. State of New York. Executive Orders: State of New York; [Available from:  
38 446 <https://www.governor.ny.gov/keywords/executive-order> accessed 1/17/2021.
- 39 447 28. Cavalcanti AB, Zampieri FG, Rosa RG, et al. Hydroxychloroquine with or without  
40 448 Azithromycin in Mild-to-Moderate Covid-19. *The New England journal of medicine*  
41 449 2020;383(21):2041-52. doi: 10.1056/NEJMoa2019014 [published Online First:  
42 450 2020/07/25]
- 43 451 29. Sterne JAC, Murthy S, Diaz JV, et al. Association Between Administration of Systemic  
44 452 Corticosteroids and Mortality Among Critically Ill Patients With COVID-19: A Meta-  
45 453 analysis. *Jama* 2020;324(13):1330-41. doi: 10.1001/jama.2020.17023 [published Online  
46 454 First: 2020/09/03]
- 47 455 30. Carsana L, Sonzogni A, Nasr A, et al. Pulmonary post-mortem findings in a series of  
48 456 COVID-19 cases from northern Italy: a two-centre descriptive study. *The Lancet*  
49 457 *infectious diseases* 2020;20(10):1135-40.

- 1  
2  
3 458 31. United States Federal Drug Administration. FDA's approval of Veklury (remdesivir) for the  
4 459 treatment of COVID-19—The Science of Safety and Effectiveness: United States Federal  
5 460 Drug Administration; [Available from: <https://www.fda.gov/drugs/drug-safety-and-availability/fdas-approval-veklury-remdesivir-treatment-covid-19-science-safety-and-effectiveness>  
6 461 accessed 1/17/2021.  
7 462  
8 463 32. Esler M, Esler D. Can angiotensin receptor-blocking drugs perhaps be harmful in the  
9 464 COVID-19 pandemic? *Journal of hypertension* 2020;38(5):781-82. doi:  
10 465 10.1097/hjh.0000000000002450 [published Online First: 2020/03/21]  
11 466 33. Mancia G, Rea F, Ludergnani M, et al. Renin–Angiotensin–Aldosterone System Blockers  
12 467 and the Risk of Covid-19. *New England Journal of Medicine* 2020;382(25):2431-40. doi:  
13 468 10.1056/NEJMoa2006923  
14 469 34. Zhang P, Zhu L, Cai J, et al. Association of Inpatient Use of Angiotensin-Converting  
15 470 Enzyme Inhibitors and Angiotensin II Receptor Blockers With Mortality Among Patients  
16 471 With Hypertension Hospitalized With COVID-19. *Circulation research*  
17 472 2020;126(12):1671-81. doi: doi:10.1161/CIRCRESAHA.120.317134  
18 473 35. Tan WYT, Young BE, Lye DC, et al. Statin use is associated with lower disease severity in  
19 474 COVID-19 infection. *Scientific Reports* 2020;10(1):17458. doi: 10.1038/s41598-020-  
20 475 74492-0  
21 476 36. Saeed O, Castagna F, Agalliu I, et al. Statin Use and In-Hospital Mortality in Patients With  
22 477 Diabetes Mellitus and COVID-19. *Journal of the American Heart Association*  
23 478 2020;9(24):e018475. doi: doi:10.1161/JAHA.120.018475  
24 479 37. Paul V, Patel S, Royse M, et al. Proning in Non-Intubated (PINI) in Times of COVID-19:  
25 480 Case Series and a Review. *Journal of intensive care medicine* 2020;35(8):818-24. doi:  
26 481 10.1177/0885066620934801 [published Online First: 2020/07/08]  
27 482 38. New York City Department of Health and Mental Hygiene. Health Department Releases  
28 483 Detailed Report on COVID-19 Variants: New York City Department of Health and  
29 484 Mental Hygiene; 2021 [Available from:  
30 485 <https://www1.nyc.gov/site/doh/about/press/pr2021/health-department-releases-detailed-report-on-covid-19-variants.page>  
31 486 accessed 4/21/2021.  
32 487 39. New York City Department of Health and Mental Hygiene. COVID-19: Data - Vaccines:  
33 488 New York City Department of Health and Mental Hygiene; 2021 [Available from:  
34 489 <https://www1.nyc.gov/site/doh/covid/covid-19-data-vaccines.page#dosestrend>  
35 490 accessed  
36 491 12/10/2021.  
37  
38  
39  
40  
41  
42  
43  
44  
45  
46  
47  
48  
49  
50  
51  
52  
53  
54  
55  
56  
57  
58  
59  
60

**Table 1. Demographics, Past Medical History, and Clinical Characteristics of Admitted Patients**

|                                                 | Spring (n=4495) |                     | Summer (n=264) |                    | Fall (n=377) |                    | Winter (n=2254) |                     |
|-------------------------------------------------|-----------------|---------------------|----------------|--------------------|--------------|--------------------|-----------------|---------------------|
|                                                 | Sample          | Value               | Sample         | Value              | Sample       | Value              | Sample          | Value               |
| <b>30-Day hospital outcome</b>                  |                 |                     |                |                    |              |                    |                 |                     |
| Still admitted - no (%)                         | 4495            | 194 (4.3)           | 264            | 6 (2.3)            | 377          | 15 (4.0)           | 2254            | 103 (4.6)           |
| Discharged alive - no (%)                       | 4495            | 3177 (70.7)         | 264            | 229 (86.7)         | 377          | 336 (89.1)         | 2254            | 1893 (84.0)         |
| Dead in the hospital - no (%)                   | 4495            | 1124 (25.0)         | 264            | 29 (11.0)          | 377          | 26 (6.9)           | 2254            | 258 (11.4)          |
| <b>Demographics</b>                             |                 |                     |                |                    |              |                    |                 |                     |
| Age (IQR) - yr                                  | 4495            | 66 (55 - 77)        | 264            | 66 (50 - 76)       | 377          | 63 (50 - 73)       | 2254            | 67 (56 - 77)        |
| Male sex - no (%)                               | 4495            | 2377 (52.9)         | 264            | 138 (52.3)         | 377          | 198 (52.5)         | 2254            | 1122 (49.8)         |
| Black race and / or Hispanic ethnicity – no (%) | 4495            | 3345 (74.4)         | 264            | 219 (83.0)         | 377          | 286 (75.9)         | 2254            | 1635 (74.2)         |
| Body Mass Index (IQR) - kg/m <sup>2</sup>       | 4229            | 28.4 (24.6 - 33)    | 250            | 27.6 (22.5 - 32.7) | 358          | 28.6 (25 - 34.1)   | 2194            | 28.2 (24.4 - 33.1)  |
| Hospital bed saturation (IQR) - %               | 4495            | 97.4 (86.5 – 107.6) | 264            | 81.7 (76.3 – 85.8) | 377          | 87.6 (83.2 - 90.2) | 2254            | 95.3 (91.9 – 101.8) |
| <b>Past Medical History</b>                     |                 |                     |                |                    |              |                    |                 |                     |
| Hypertension - no (%)                           | 4495            | 3370 (75)           | 264            | 197 (74.6)         | 377          | 254 (67.4)         | 2254            | 1713 (76)           |
| Sleep apnea - no (%)                            | 4495            | 521 (11.6)          | 264            | 28 (10.6)          | 377          | 47 (12.5)          | 2254            | 270 (12)            |
| Hyperlipidemia - no (%)                         | 4495            | 2609 (58)           | 264            | 153 (58)           | 377          | 199 (52.8)         | 2254            | 1380 (61.2)         |
| Atrial fibrillation - no (%)                    | 4495            | 449 (10)            | 264            | 30 (11.4)          | 377          | 35 (9.3)           | 2254            | 267 (11.8)          |

|                                              |      |                    |     |                    |     |                    |      |                    |
|----------------------------------------------|------|--------------------|-----|--------------------|-----|--------------------|------|--------------------|
| Chronic kidney disease - no (%)              | 4495 | 1406 (31.3)        | 264 | 70 (26.5)          | 377 | 85 (22.5)          | 2254 | 620 (27.5)         |
| Heart failure - no (%)                       | 4495 | 980 (21.8)         | 264 | 72 (27.3)          | 377 | 66 (17.5)          | 2254 | 519 (23)           |
| Coronary artery disease - no (%)             | 4495 | 1316 (29.3)        | 264 | 95 (36)            | 377 | 108 (28.6)         | 2254 | 721 (32)           |
| Asthma/COPD - no (%)                         | 4495 | 1371 (30.5)        | 264 | 84 (31.8)          | 377 | 98 (26)            | 2254 | 753 (33.4)         |
| Diabetes mellitus - no (%)                   | 4495 | 2522 (56.1)        | 264 | 148 (56.1)         | 377 | 187 (49.6)         | 2254 | 1244 (55.2)        |
| <b>Vitals at Presentation</b>                |      |                    |     |                    |     |                    |      |                    |
| Temperature (IQR) - F                        | 4463 | 98.9 (98.2 - 100)  | 264 | 98.4 (97.8 - 98.9) | 372 | 98.8 (98.1 - 99.9) | 2254 | 98.7 (98.1 - 99.8) |
| SBP (IQR) - mmHg                             | 4469 | 131 (114 - 148)    | 264 | 132 (117 - 149)    | 375 | 131 (117 - 147)    | 2254 | 132 (117 - 148)    |
| DBP (IQR) - mmHg                             | 4465 | 75 (65 - 84)       | 263 | 77 (67 - 87)       | 374 | 74 (68 - 84)       | 2252 | 75 (67 - 84)       |
| HR (IQR) – bpm                               | 4467 | 98 (85 - 112)      | 264 | 92.5 (76.3 - 105)  | 372 | 94 (80 - 107)      | 2253 | 95 (82 - 107)      |
| Oxygen saturation (IQR) - %                  | 4463 | 95 (91 - 98)       | 264 | 98 (96 - 99)       | 372 | 96 (94 - 98)       | 2253 | 96 (92 - 98)       |
| Respiratory Rate (IQR) - bpm                 | 4466 | 20 (18 - 22)       | 264 | 18 (17 - 20)       | 372 | 18 (18 - 20)       | 2254 | 19 (18 - 22)       |
| <b>Laboratory Markers</b>                    |      |                    |     |                    |     |                    |      |                    |
| Hemoglobin (IQR) - g/dL                      | 4372 | 12.8 (11.2 - 14.1) | 261 | 12.4 (10.7 - 13.9) | 370 | 13 (11.6 - 14.3)   | 2228 | 12.9 (11.5 - 14.2) |
| Platelet count (IQR) -k/ $\mu$ L             | 4372 | 188 (116 - 260)    | 261 | 228 (169 - 300)    | 372 | 200 (144 - 257)    | 2228 | 196 (143 - 259)    |
| White blood cell count (IQR) - k/ $\mu$ L    | 4372 | 7.5 (5.6 - 10.6)   | 261 | 8 (5.8 - 11)       | 370 | 6.6 (5.1 - 8.9)    | 2228 | 6.4 (4.7 - 8.8)    |
| Absolute lymphocyte count (IQR) - k/ $\mu$ L | 4420 | 1 (0.7 - 1.4)      | 263 | 1.2 (0.9 - 1.8)    | 374 | 1.1 (0.8 - 1.5)    | 2246 | 1 (0.7 - 1.4)      |
| Sodium (IQR) – mEq/L                         | 4414 | 137 (134 - 141)    | 263 | 138 (135 - 141)    | 377 | 137 (135 - 140)    | 2253 | 137 (134 - 140)    |



|                                        |      |                    |     |                    |     |                    |      |                    |
|----------------------------------------|------|--------------------|-----|--------------------|-----|--------------------|------|--------------------|
| Potassium (IQR) – mEq/L                | 4389 | 4.3 (3.9 - 4.8)    | 262 | 4.2 (3.8 - 4.6)    | 377 | 4 (3.8 - 4.4)      | 2243 | 4.1 (3.8 - 4.5)    |
| Chloride (IQR) – mEq/L                 | 4394 | 98 (95 - 103)      | 263 | 103 (100 - 105)    | 377 | 101 (99 - 104)     | 2253 | 101 (98 - 104)     |
| Bicarbonates (IQR) – mEq/L             | 4414 | 24 (20 - 26)       | 263 | 24 (21 - 27)       | 377 | 25 (22 - 27)       | 2253 | 24 (21 - 27)       |
| Creatinine (IQR) - mg/dL               | 4410 | 1.1 (0.8 - 2)      | 263 | 1 (0.8 - 1.5)      | 377 | 1 (0.8 - 1.3)      | 2253 | 1.1 (0.8 - 1.5)    |
| Glucose (IQR) - mg/dL                  | 4414 | 134 (108 - 197)    | 263 | 121 (100 - 171)    | 377 | 122 (102 - 173)    | 2253 | 126 (104 - 184)    |
| Aspartate aminotransferase (IQR) - U/L | 4045 | 40 (27 - 65)       | 245 | 26 (20 - 38)       | 354 | 31 (21 - 47)       | 2084 | 35 (24 - 55)       |
| Alanine aminotransferase (IQR) - U/L   | 4206 | 27 (17 - 44)       | 252 | 21 (14 - 32)       | 361 | 25 (16 - 41)       | 2171 | 26 (17 - 44)       |
| Lactic acid (IQR) – mmol/L             | 3981 | 2.1 (1.6 - 3)      | 220 | 1.9 (1.4 - 2.7)    | 330 | 1.8 (1.3 - 2.5)    | 1913 | 1.9 (1.4 - 2.5)    |
| Lactate dehydrogenase (IQR) - mmol/L   | 2935 | 384 (285 - 535)    | 160 | 254.5 (196 - 340)  | 285 | 300 (225 - 383)    | 1563 | 341 (254 - 468)    |
| Creatine Kinase (IQR) – U/L            | 3453 | 168 (83 - 401)     | 209 | 97 (57 - 176)      | 313 | 116 (60 - 213)     | 1957 | 126 (67 - 282)     |
| D-dimer (IQR) - µg/mL                  | 2204 | 1.8 (0.9 - 3.9)    | 185 | 1.1 (0.5 - 2.2)    | 317 | 0.8 (0.5 - 1.6)    | 1907 | 1.2 (0.7 - 2.3)    |
| Procalcitonin (IQR) – ng/mL            | 1789 | 0.2 (0.1 - 0.9)    | 120 | 0.1 (0.1 - 0.4)    | 254 | 0.1 (0.1 - 0.2)    | 1252 | 0.1 (0.1 - 0.3)    |
| Troponin T* (IQR) - ng/mL              | 0    | NA                 | 219 | 0.01 (0.01 - 0.03) | 342 | 0.01 (0.01 - 0.02) | 2106 | 0.01 (0.01 - 0.03) |
| Troponin I* (IQR) – ng/mL              | 3662 | 0.01 (0.01 - 0.03) | 3   | 0.01 (0.01 - 0.01) | 0   | NA                 | 0    | NA                 |
| Interleukin-6 (IQR) – pg/mL            | 1056 | 33.6 (13.8 - 75.2) | 87  | 11.7 (3 - 43.1)    | 186 | 11 (4.7 - 22.2)    | 710  | 10.8 (4.3 - 25.6)  |
| Fibrinogen (IQR) – mg/dL               | 1552 | 624 (491 - 750)    | 122 | 448 (370- 583)     | 224 | 540 (436 - 663)    | 1040 | 535.5 (434 - 652)  |

1  
2  
3  
4  
5  
6  
7  
8  
9  
10  
11  
12  
13  
14  
15  
16  
17  
18  
19  
20  
21  
22  
23  
24  
25  
26  
27  
28  
29  
30  
31  
32  
33  
34  
35  
36  
37  
38  
39  
40  
41  
42  
43  
44  
45  
46  
47

|                           |      |                  |     |                |     |                 |      |                  |
|---------------------------|------|------------------|-----|----------------|-----|-----------------|------|------------------|
| Ferritin (IQR) –<br>ng/mL | 1969 | 716 (335 - 1498) | 155 | 228 (90 - 562) | 293 | 364 (166 - 785) | 1637 | 510 (230 - 1094) |
|---------------------------|------|------------------|-----|----------------|-----|-----------------|------|------------------|

COPD = Chronic obstructive pulmonary disease; DBP = Diastolic blood pressure; HR = Heart rate; IQR = Interquartile range; SBP = Systolic blood pressure. \* Troponin T was available only until June 2020, Troponin I was available only after June 2020.

For peer review only



**Table 2. Association with In-Hospital Mortality (Regression models with competing risks)**

| Variable                            | Multivariable         |         |
|-------------------------------------|-----------------------|---------|
|                                     | HR (95% CI)           | P-value |
| Age - yr                            | 1.046 (1.04 - 1.051)  | <0.001  |
| Male sex - yes/no                   | 1.352 (1.187 - 1.54)  | <0.001  |
| Body mass index - kg/m <sup>2</sup> | 1.022 (1.012 - 1.032) | <0.001  |
| Temperature - F                     | 1.071 (1.036 - 1.108) | <0.001  |
| SBP - mmHg                          | 0.994 (0.991 - 0.997) | <0.001  |
| DBP - mmHg                          | 0.996 (0.991 - 1.001) | 0.14    |
| HR - bpm                            | 1.003 (0.999 - 1.006) | 0.11    |
| Oxygen saturation - %               | 0.967 (0.961 - 0.972) | <0.001  |
| Respiratory rate - bpm              | 1.027 (1.019 - 1.035) | <0.001  |
| White blood cell count - k/ $\mu$ L | 1.008 (1.001 - 1.016) | 0.02    |
| Glucose - mg/dL                     | 1.001 (1 - 1.001)     | 0.001   |
| Aspartate aminotransferase - U/L    | 1 (1 - 1.001)         | 0.21    |
| Alanine aminotransferase - U/L      | 1 (0.999 - 1)         | 0.25    |
| Lactic acid - mmol/L                | 1.071 (1.036 - 1.107) | <0.001  |
| Platelet count - k/ $\mu$ L         | 0.999 (0.998 - 0.999) | <0.001  |
| Potassium - mEq/L                   | 1.096 (1.028 - 1.168) | 0.0052  |
| Bicarbonates - mEq/L                | 0.957 (0.944 - 0.971) | <0.001  |
| Creatinine - mg/dL                  | 1.023 (0.998 - 1.049) | 0.069   |
| HTN - yes/no                        | 1.008 (0.851 - 1.194) | 0.93    |
| HLD - yes/no                        | 1.196 (1.02 - 1.401)  | 0.027   |
| CKD - yes/no                        | 1.263 (1.09 - 1.462)  | 0.002   |
| HF - yes/no                         | 1.33 (1.146 - 1.543)  | <0.001  |
| COPD/Asthma - yes/no                | 0.948 (0.827 - 1.088) | 0.45    |
| DM - yes/no                         | 0.946 (0.819 - 1.093) | 0.45    |
| CAD - yes/no                        | 1.101 (0.955 - 1.271) | 0.19    |
| Statin use - %                      | 0.577 (0.501 - 0.664) | <0.001  |
| Bed occupancy - %                   | 1.007 (1.002 - 1.013) | 0.004   |

CAD = Coronary artery disease; CKD = Chronic kidney disease; COPD = Chronic obstructive pulmonary disease; DBP = Diastolic blood pressure; DM = Diabetes mellitus; HLD = hyperlipidemia; HF = Heart failure; HR = Heart rate; HTN = Hypertension; SBP = Systolic blood pressure

## Figure Legends

### Figure 1. Simultaneously Admitted Patients

This graph includes the hospitalized patients and the admitted patients in the emergency department waiting for a bed. A precipitous decline of non-COVID-19 admissions begins on March 16, 2020 (vertical gray line) coinciding with gubernatorial health care associated directives in the State of New York. The dotted red line indicates the nominal bed capacity of our institution (1,491 beds).

### Figure 2. Cumulative Monthly Admission and Mortality

Cumulative monthly admissions (blue line, left axis) and mortality (orange line, right axis) over the year.

### Figure 3. Change in Therapies

Percent of patients receiving specific therapies over the year.

### Figure 4. Cumulative Incidences

30-day in-hospital mortality by seasons.



Figure 1

85x62mm (300 x 300 DPI)

1  
2  
3  
4  
5  
6  
7  
8  
9  
10  
11  
12  
13  
14  
15  
16  
17  
18  
19  
20  
21  
22  
23  
24  
25  
26  
27  
28  
29  
30  
31  
32  
33  
34  
35  
36  
37  
38  
39  
40  
41  
42  
43  
44  
45  
46  
47  
48  
49  
50  
51  
52  
53  
54  
55  
56  
57  
58  
59  
60

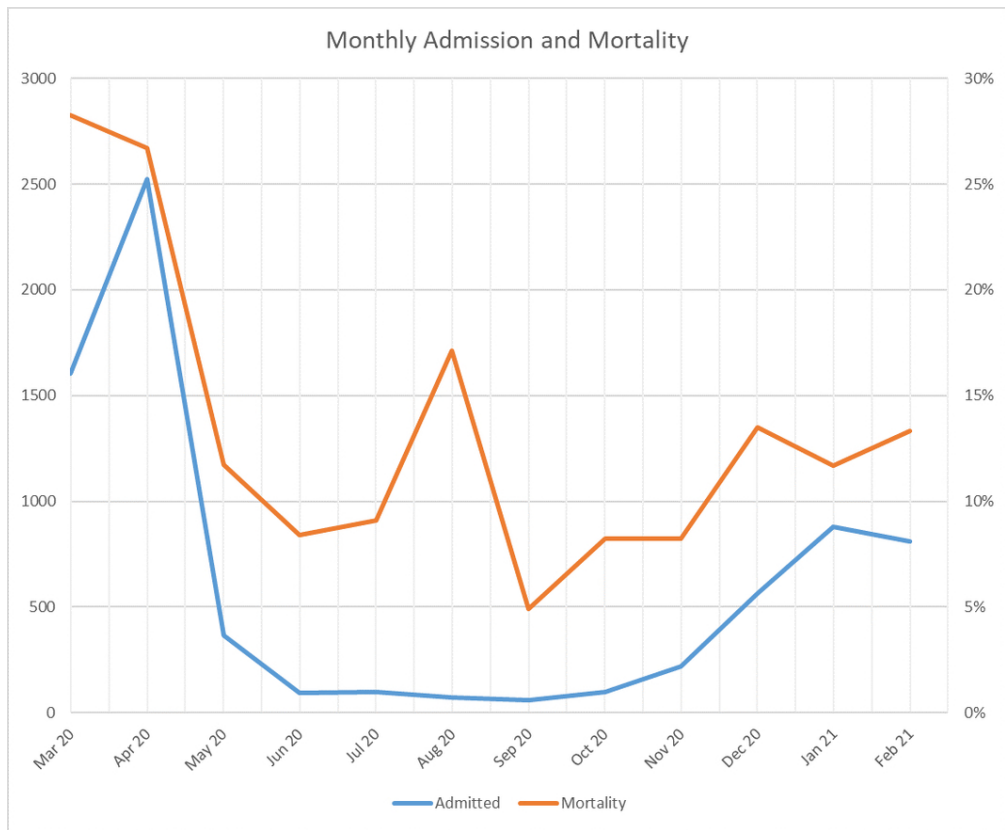

Figure 2

90x74mm (300 x 300 DPI)

1  
2  
3  
4  
5  
6  
7  
8  
9  
10  
11  
12  
13  
14  
15  
16  
17  
18  
19  
20  
21  
22  
23  
24  
25  
26  
27  
28  
29  
30  
31  
32  
33  
34  
35  
36  
37  
38  
39  
40  
41  
42  
43  
44  
45  
46  
47  
48  
49  
50  
51  
52  
53  
54  
55  
56  
57  
58  
59  
60

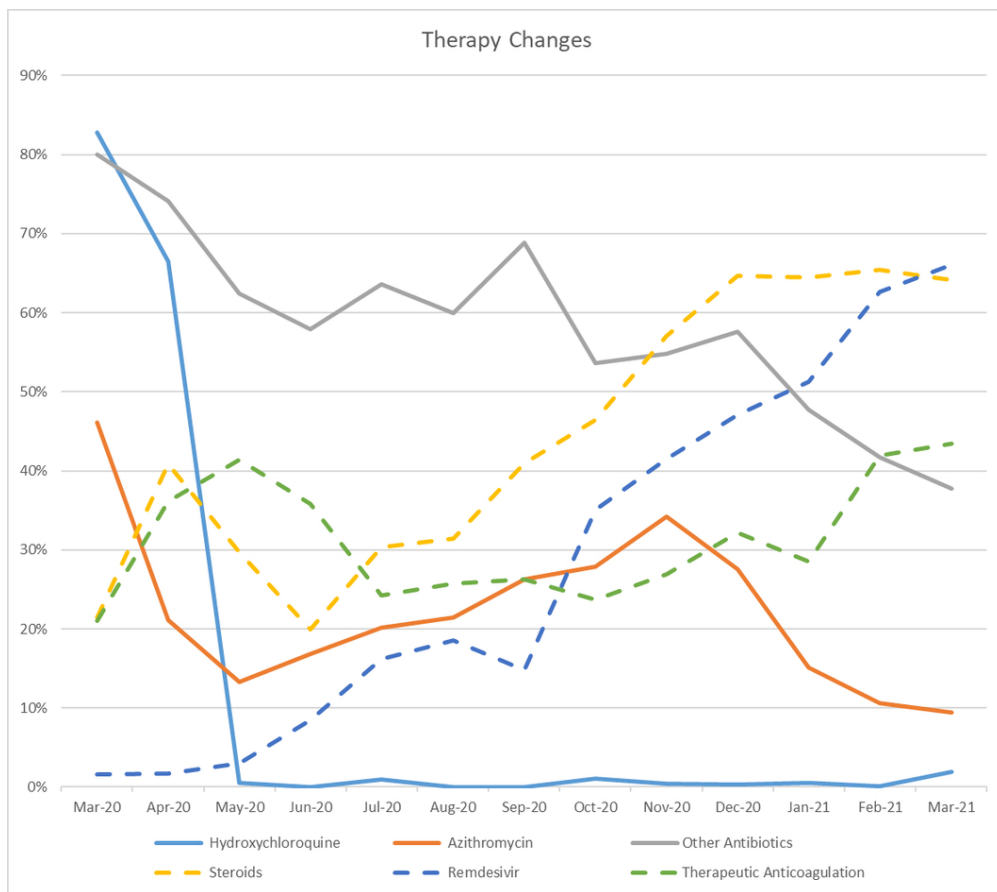

Figure 3

89x79mm (300 x 300 DPI)

1  
2  
3  
4  
5  
6  
7  
8  
9  
10  
11  
12  
13  
14  
15  
16  
17  
18  
19  
20  
21  
22  
23  
24  
25  
26  
27  
28  
29  
30  
31  
32  
33  
34  
35  
36  
37  
38  
39  
40  
41  
42  
43  
44  
45  
46  
47  
48  
49  
50  
51  
52  
53  
54  
55  
56  
57  
58  
59  
60

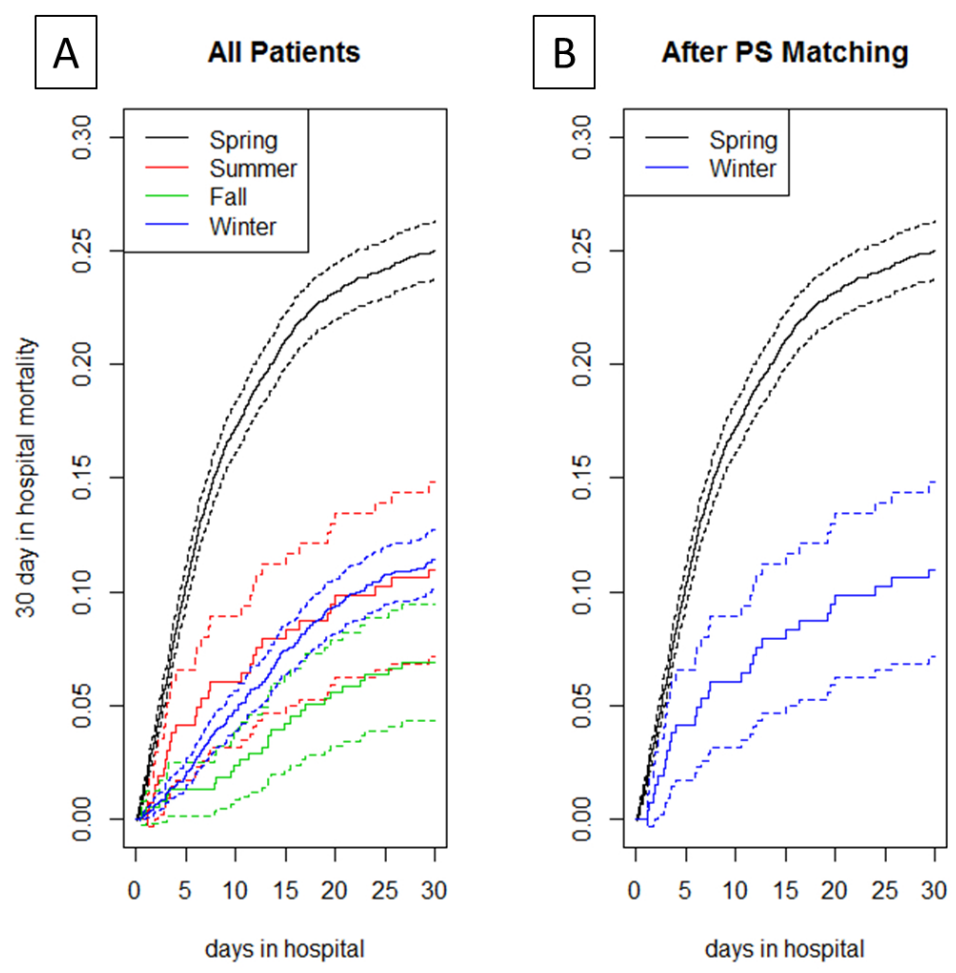

Figure 4

88x88mm (300 x 300 DPI)

**Supplemental Appendix**

**Table of contents**

1  
2  
3  
4  
5  
6  
7  
8  
9  
10 **Supplemental Table 1 - Comparison Survivors versus Non-survivors..... 3**  
11  
12 **Supplemental Methods ..... 6**  
13 **Supplemental Table 2 - Comparison Spring Vs Winter..... 7**  
14 **Supplemental Table 3 - Therapies Administered during the Admission ..... 10**  
15 **Supplemental Figure 1 - Distribution of Propensity Score ..... 11**  
16  
17  
18  
19  
20  
21  
22  
23  
24  
25  
26  
27  
28  
29  
30  
31  
32  
33  
34  
35  
36  
37  
38  
39  
40  
41  
42  
43  
44  
45  
46  
47  
48  
49  
50  
51  
52  
53  
54  
55  
56  
57  
58  
59  
60

1  
2 Francesco Castagna MD<sup>1</sup>, Xiaonan Xue PhD<sup>2</sup>, Omar Saeed MD<sup>1</sup>, Rachna Kataria MD<sup>1</sup>, Yoram A Puius MD  
3  
4 PhD<sup>3</sup>, Snehal R Patel MD<sup>1</sup>, Mario J Garcia MD<sup>1</sup>, Andrew D Racine MD<sup>4</sup>, Daniel B Sims MD<sup>1</sup>, Ulrich P Jorde  
5  
6 MD<sup>1</sup>  
7  
8  
9  
10

11  
12 <sup>1</sup> Division of Cardiology, Montefiore Medical Center and Albert Einstein College of Medicine, Bronx, NY  
13

14 <sup>2</sup> Department of Epidemiology and Population Health, Albert Einstein College of Medicine, Bronx, NY  
15

16 <sup>3</sup> Division of Infectious Diseases, Montefiore Medical Center and Albert Einstein College of Medicine, Bronx,  
17  
18 NY  
19

20  
21 <sup>4</sup> Department of Pediatrics, Montefiore Medical Center and Albert Einstein College of Medicine, Bronx, New  
22 York.  
23  
24  
25  
26  
27  
28  
29  
30  
31  
32  
33  
34  
35  
36  
37  
38  
39  
40  
41  
42  
43  
44  
45  
46  
47  
48  
49  
50  
51  
52  
53  
54  
55  
56  
57  
58  
59  
60



**Supplemental Table 1 - Comparison Survivors versus Non-survivors**

|                                                 | Survivors (n=5953) |                     | Non-survivors (n=1437) |                     | p-value |
|-------------------------------------------------|--------------------|---------------------|------------------------|---------------------|---------|
|                                                 | Sample             | Value               | Sample                 | Value               |         |
| <b>Demographics</b>                             |                    |                     |                        |                     |         |
| Age (IQR) - yr                                  | 5953               | 64 (52 - 75)        | 1437                   | 73 (65 - 82)        | <0.001  |
| Male sex - no (%)                               | 5953               | 2989 (50.2)         | 1437                   | 846 (58.9)          | <0.001  |
| Black race and / or Hispanic ethnicity – no (%) | 5953               | 4472 (75.1)         | 1437                   | 1013 (70.5)         | <0.001  |
| Body Mass Index (IQR) - kg/m <sup>2</sup>       | 5679               | 28.4 (24.6 - 33.2)  | 1352                   | 27.9 (23.8 - 32.6)  | <0.001  |
| Hospital bed saturation (IQR) - %               | 5953               | 94.1 (86.5 - 104.8) | 1437                   | 99.3 (87.5 - 107.6) | <0.001  |
| <b>Past Medical History</b>                     |                    |                     |                        |                     |         |
| Hypertension - no (%)                           | 5953               | 4365 (73.3)         | 1437                   | 1169 (81.4)         | <0.001  |
| Sleep apnea - no (%)                            | 5953               | 688 (11.6)          | 1437                   | 178 (12.4)          | 0.38    |
| Hyperlipidemia - no (%)                         | 5953               | 3366 (56.5)         | 1437                   | 975 (67.8)          | <0.001  |
| Atrial fibrillation - no (%)                    | 5953               | 557 (9.4)           | 1437                   | 224 (15.6)          | <0.001  |
| Chronic kidney disease - no (%)                 | 5953               | 1559 (26.2)         | 1437                   | 622 (43.3)          | <0.001  |
| Heart failure - no (%)                          | 5953               | 1181 (19.8)         | 1437                   | 456 (31.7)          | <0.001  |
| Coronary artery disease - no (%)                | 5953               | 1653 (27.8)         | 1437                   | 587 (40.8)          | <0.001  |
| Asthma/COPD - no (%)                            | 5953               | 1842 (30.9)         | 1437                   | 464 (32.3)          | 0.32    |
| Diabetes mellitus - no (%)                      | 5953               | 3168 (53.2)         | 1437                   | 933 (64.9)          | <0.001  |
| <b>Vitals at Presentation</b>                   |                    |                     |                        |                     |         |
| Temperature (IQR) - F                           | 5926               | 99 (98 - 100)       | 1427                   | 99 (98 - 100)       | 0.35    |
| SBP (IQR) - mmHg                                | 5932               | 132 (117 - 148)     | 1430                   | 127 (107 - 146)     | <0.001  |
| DBP (IQR) - mmHg                                | 5926               | 76 (67 - 85)        | 1428                   | 71 (60 - 81)        | <0.001  |
| HR (IQR) – bpm                                  | 5927               | 96 (83 - 110)       | 1429                   | 100 (85 - 114)      | <0.001  |

|                                              |      |                    |      |                    |        |
|----------------------------------------------|------|--------------------|------|--------------------|--------|
| Oxygen saturation (IQR) - %                  | 5922 | 96 (93 - 98)       | 1430 | 92 (84 - 96)       | <0.001 |
| Respiratory Rate (IQR) - bpm                 | 5928 | 19 (18 - 21)       | 1428 | 22 (19 - 26)       | <0.001 |
| <b>Laboratory Markers</b>                    |      |                    |      |                    |        |
| Hemoglobin (IQR) - g/dL                      | 5823 | 12.9 (11.4 - 14.1) | 1408 | 12.6 (10.9 - 14.2) | 0.006  |
| Platelet count (IQR) -k/ $\mu$ L             | 5825 | 198 (137 - 264)    | 1408 | 172 (88 - 246)     | <0.001 |
| White blood cell count (IQR) - k/ $\mu$ L    | 5823 | 6.9 (5.1 - 9.5)    | 1408 | 8.3 (6.0 - 11.9)   | <0.001 |
| Absolute lymphocyte count (IQR) - k/ $\mu$ L | 5880 | 1.1 (0.7 - 1.5)    | 1423 | 0.9 (0.6 - 1.2)    | <0.001 |
| Sodium (IQR) – mEq/L                         | 5879 | 137 (134 - 140)    | 1428 | 138 (134 - 143)    | <0.001 |
| Potassium (IQR) – mEq/L                      | 5845 | 4.2 (3.8 - 4.6)    | 1426 | 4.4 (4.0 – 5.0)    | <0.001 |
| Chloride (IQR) – mEq/L                       | 5864 | 100 (96 - 103)     | 1423 | 100 (95 - 104)     | 0.28   |
| Bicarbonates (IQR) – mEq/L                   | 5879 | 24 (21 - 27)       | 1428 | 22 (18 - 25)       | <0.001 |
| Creatinine (IQR) - mg/dL                     | 5876 | 1.0 (0.8 - 1.5)    | 1427 | 1.6 (1 - 2.9)      | <0.001 |
| Glucose (IQR) - mg/dL                        | 5879 | 126 (104 - 179)    | 1428 | 156 (121 - 236)    | <0.001 |
| Aspartate aminotransferase (IQR) - U/L       | 5416 | 35 (24 - 55)       | 1312 | 52 (33 - 81)       | <0.001 |
| Alanine aminotransferase (IQR) - U/L         | 5614 | 26 (16 - 42)       | 1376 | 28 (18 - 46)       | <0.001 |
| Lactic acid (IQR) – mmol/L                   | 5097 | 1.9 (1.4 - 2.6)    | 1347 | 2.6 (1.8 - 3.9)    | <0.001 |
| Lactate dehydrogenase (IQR) - mmol/L         | 4017 | 384 $\pm$ 219      | 926  | 518 (371 - 706)    | <0.001 |
| Creatine Kinase (IQR) – U/L                  | 4714 | 336 (253 - 454)    | 1218 | 777 $\pm$ 2657     | <0.001 |
| D-dimer (IQR) - $\mu$ g/mL                   | 3850 | 1.2 (0.7 - 2.5)    | 763  | 2.5 (1.3 - 6.9)    | <0.001 |
| Procalcitonin (IQR) – ng/mL                  | 2800 | 0.1 (0.1 - 0.3)    | 615  | 0.6 (0.2 - 2.4)    | <0.001 |
| Troponin T* (IQR) - ng/mL                    | 2365 | 0.01 (0.01 - 0.03) | 302  | 0.03 (0.01 - 0.1)  | <0.001 |
| Troponin I* (IQR) – ng/mL                    | 2684 | 0.01 (0.01 – 0.02) | 981  | 0.02 (0.01 - 0.08) | <0.001 |
| Interleukin-6 (IQR) – pg/mL                  | 1752 | 17 (6 - 40)        | 287  | 68 (26- 154)       | <0.001 |
| Fibrinogen (IQR) – mg/dL                     | 2478 | 570 (448 - 690)    | 460  | 621 (506 - 761)    | <0.001 |

|                        |      |                  |     |                   |        |
|------------------------|------|------------------|-----|-------------------|--------|
| Ferritin (IQR) – ng/mL | 3395 | 521 (224 - 1112) | 659 | 1021 (514 - 2161) | <0.001 |
|------------------------|------|------------------|-----|-------------------|--------|

COPD = Chronic obstructive pulmonary disease; DBP = Diastolic blood pressure; HR = Heart rate; IQR = Interquartile range; SBP = Systolic blood pressure. \* Troponin T was available only until June 2020, Troponin I was available only after June 2020.

For peer review only

## Supplemental Methods

### *Covariate Selection Method for Multivariable Competing Risk Proportional Hazard Models for in-hospital Death between Patients Spring and Winter Patients*

The covariates in the multivariable analyses included factors present in > 90% of our dataset, are known to be associated with in-hospital COVID-19 mortality based on prior literature or with a univariate association between admission season (exposure) or in-hospital mortality (outcome) ( $p < 0.05$ ) and a clinical (relative difference >5%) difference between the spring and winter patients (**Supplemental Table 2**). These variables included: age, sex, BMI, vital signs at presentation, white cell count, creatinine, glucose, alanine transaminase, history of hypertension, dyslipidemia, chronic kidney disease (CKD), heart failure, coronary artery disease, asthma/chronic obstructive pulmonary disease, diabetes mellitus and statin use. Also in this model, lactic acid level and percent of hospital bed saturation were forced into the model as marker of illness severity and level of hospital stress, respectively.

**Supplemental Table 2 - Comparison Spring Vs Winter**

|                                                 | Spring (n=4495) |                     | Winter (n=2254) |                     | P-value |
|-------------------------------------------------|-----------------|---------------------|-----------------|---------------------|---------|
|                                                 | Sample          | Value               | Sample          | Value               |         |
| <b>Demographics</b>                             |                 |                     |                 |                     |         |
| Age (IQR) - yr                                  | 4495            | 66 (55 - 77)        | 2254            | 67 (56 - 77)        | 0.051   |
| Male sex - no (%)                               | 4495            | 2377 (52.9)         | 2254            | 1122 (49.8)         | 0.016   |
| Black race and / or Hispanic ethnicity – no (%) | 4495            | 3345 (74.4)         | 2254            | 1635 (72.5)         | 0.098   |
| Body Mass Index (IQR) - kg/m <sup>2</sup>       | 4229            | 28.4 (24.6 - 33)    | 2194            | 28.2 (24.4 - 33.1)  | 0.433   |
| Hospital bed saturation (IQR) - %               | 4495            | 97.4 (86.5 – 107.6) | 2254            | 95.3 (91.9 – 101.8) | <0.001  |
| <b>Past Medical History</b>                     |                 |                     |                 |                     |         |
| Hypertension - no (%)                           | 4495            | 3370 (75)           | 2254            | 1713 (76)           | 0.357   |
| Sleep apnea - no (%)                            | 4495            | 521 (11.6)          | 2254            | 270 (12)            | 0.640   |
| Hyperlipidemia - no (%)                         | 4495            | 2609 (58)           | 2254            | 1380 (61.2)         | 0.012   |
| Atrial fibrillation - no (%)                    | 4495            | 449 (10)            | 2254            | 267 (11.8)          | 0.019   |
| Chronic kidney disease - no (%)                 | 4495            | 1406 (31.3)         | 2254            | 620 (27.5)          | 0.001   |
| Heart failure - no (%)                          | 4495            | 980 (21.8)          | 2254            | 519 (23)            | 0.254   |
| Coronary artery disease - no (%)                | 4495            | 1316 (29.3)         | 2254            | 721 (32)            | 0.022   |
| Asthma/COPD - no (%)                            | 4495            | 1371 (30.5)         | 2254            | 753 (33.4)          | 0.015   |
| Diabetes mellitus - no (%)                      | 4495            | 2522 (56.1)         | 2254            | 1244 (55.2)         | 0.475   |
| <b>Vitals at Presentation</b>                   |                 |                     |                 |                     |         |
| Temperature (IQR) - F                           | 4463            | 98.9 (98.2 - 100)   | 2254            | 98.7 (98.1 - 99.8)  | <0.001  |
| SBP (IQR) - mmHg                                | 4469            | 131 (114 - 148)     | 2254            | 132 (117 - 148)     | 0.002   |
| DBP (IQR) - mmHg                                | 4465            | 75 (65 - 84)        | 2252            | 75 (67 - 84)        | 0.117   |
| HR (IQR) – bpm                                  | 4467            | 98 (85 - 112)       | 2253            | 95 (82 - 107)       | <0.001  |

|    |                                              |      |                    |      |                    |        |
|----|----------------------------------------------|------|--------------------|------|--------------------|--------|
| 1  | Oxygen saturation (IQR) - %                  | 4463 | 95 (91 - 98)       | 2253 | 96 (92 - 98)       | <0.001 |
| 2  |                                              |      |                    |      |                    |        |
| 3  | Respiratory Rate (IQR) - bpm                 | 4466 | 20 (18 - 22)       | 2254 | 19 (18 - 22)       | <0.001 |
| 4  |                                              |      |                    |      |                    |        |
| 5  | <b>Laboratory Markers</b>                    |      |                    |      |                    |        |
| 6  |                                              |      |                    |      |                    |        |
| 7  |                                              |      |                    |      |                    |        |
| 8  | Hemoglobin (IQR) - g/dL                      | 4372 | 12.8 (11.2 - 14.1) | 2228 | 12.9 (11.5 - 14.2) | 0.030  |
| 9  |                                              |      |                    |      |                    |        |
| 10 | Platelet count (IQR) -k/ $\mu$ L             | 4372 | 188 (116 - 260)    | 2228 | 196 (143 - 259)    | <0.001 |
| 11 |                                              |      |                    |      |                    |        |
| 12 | White blood cell count (IQR) - k/ $\mu$ L    | 4372 | 7.5 (5.6 - 10.6)   | 2228 | 6.4 (4.7 - 8.8)    | <0.001 |
| 13 |                                              |      |                    |      |                    |        |
| 14 | Absolute lymphocyte count (IQR) - k/ $\mu$ L | 4420 | 1 (0.7 - 1.4)      | 2246 | 1 (0.7 - 1.4)      | 0.062  |
| 15 |                                              |      |                    |      |                    |        |
| 16 | Sodium (IQR) – mEq/L                         | 4414 | 137 (134 - 141)    | 2253 | 137 (134 - 140)    | <0.001 |
| 17 |                                              |      |                    |      |                    |        |
| 18 | Potassium (IQR) – mEq/L                      | 4389 | 4.3 (3.9 - 4.8)    | 2243 | 4.1 (3.8 - 4.5)    | <0.001 |
| 19 |                                              |      |                    |      |                    |        |
| 20 | Chloride (IQR) – mEq/L                       | 4394 | 98 (95 - 103)      | 2253 | 101 (98 - 104)     | <0.001 |
| 21 |                                              |      |                    |      |                    |        |
| 22 | Bicarbonates (IQR) – mEq/L                   | 4414 | 24 (20 - 26)       | 2253 | 24 (21 - 27)       | <0.001 |
| 23 |                                              |      |                    |      |                    |        |
| 24 | Creatinine (IQR) - mg/dL                     | 4410 | 1.1 (0.8 - 2)      | 2253 | 1.1 (0.8 - 1.5)    | <0.001 |
| 25 |                                              |      |                    |      |                    |        |
| 26 | Glucose (IQR) - mg/dL                        | 4414 | 134 (108 - 197)    | 2253 | 126 (104 - 184)    | <0.001 |
| 27 |                                              |      |                    |      |                    |        |
| 28 | Aspartate aminotransferase (IQR) - U/L       | 4045 | 40 (27 - 65)       | 2084 | 35 (24 - 55)       | <0.001 |
| 29 |                                              |      |                    |      |                    |        |
| 30 | Alanine aminotransferase (IQR) - U/L         | 4206 | 27 (17 - 44)       | 2171 | 26 (17 - 44)       | 0.292  |
| 31 |                                              |      |                    |      |                    |        |
| 32 | Lactic acid (IQR) – mmol/L                   | 3981 | 2.1 (1.6 - 3)      | 1913 | 1.9 (1.4 - 2.5)    | <0.001 |
| 33 |                                              |      |                    |      |                    |        |
| 34 | Lactate dehydrogenase (IQR) - mmol/L         | 2935 | 384 (285 - 535)    | 1563 | 341 (254 - 468)    | <0.001 |
| 35 |                                              |      |                    |      |                    |        |
| 36 | Creatine Kinase (IQR) – U/L                  | 3453 | 168 (83 - 401)     | 1957 | 126 (67 - 282)     | <0.001 |
| 37 |                                              |      |                    |      |                    |        |
| 38 | D-dimer (IQR) - $\mu$ g/mL                   | 2204 | 1.8 (0.9 - 3.9)    | 1907 | 1.2 (0.7 - 2.3)    | <0.001 |
| 39 |                                              |      |                    |      |                    |        |
| 40 | Procalcitonin (IQR) – ng/mL                  | 1789 | 0.2 (0.1 - 0.9)    | 1252 | 0.1 (0.1 - 0.3)    | <0.001 |
| 41 |                                              |      |                    |      |                    |        |
| 42 | Troponin T* (IQR) - ng/mL                    | 0    | NA                 | 2106 | 0.01 (0.01 - 0.03) | NA     |
| 43 |                                              |      |                    |      |                    |        |
| 44 | Troponin I* (IQR) – ng/mL                    | 3662 | 0.01 (0.01 - 0.03) | 0    | NA                 | NA     |
| 45 |                                              |      |                    |      |                    |        |
| 46 | Interleukin-6 (IQR) – pg/mL                  | 1056 | 34 (14 - 75)       | 710  | 11 (4 - 26)        | <0.001 |
| 47 |                                              |      |                    |      |                    |        |
| 48 | Fibrinogen (IQR) – mg/dL                     | 1552 | 624 (491 - 750)    | 1040 | 536 (434 - 652)    | <0.001 |
| 49 |                                              |      |                    |      |                    |        |
| 50 |                                              |      |                    |      |                    |        |
| 51 |                                              |      |                    |      |                    |        |
| 52 |                                              |      |                    |      |                    |        |
| 53 |                                              |      |                    |      |                    |        |
| 54 |                                              |      |                    |      |                    |        |
| 55 |                                              |      |                    |      |                    |        |
| 56 |                                              |      |                    |      |                    |        |
| 57 |                                              |      |                    |      |                    |        |
| 58 |                                              |      |                    |      |                    |        |
| 59 |                                              |      |                    |      |                    |        |
| 60 |                                              |      |                    |      |                    |        |

|                        |      |                  |      |                  |        |
|------------------------|------|------------------|------|------------------|--------|
| Ferritin (IQR) – ng/mL | 1969 | 716 (335 - 1498) | 1637 | 510 (230 - 1094) | <0.001 |
|------------------------|------|------------------|------|------------------|--------|

COPD = Chronic obstructive pulmonary disease; DBP = Diastolic blood pressure; HR = Heart rate; IQR = Interquartile range; SBP = Systolic blood pressure. \* Troponin T was available only until June 2020, Troponin I was available only after June 2020.

For peer review only

### Supplemental Table 3 - Therapies Administered during the Admission

|                                                          | Spring<br>(n=4495)  | Summer<br>(n=264) | Fall<br>(n=377) | Winter<br>(n=2254) |
|----------------------------------------------------------|---------------------|-------------------|-----------------|--------------------|
| <b>Hydroxychloroquine - no (%)</b>                       | 3007 (66.9)         | 1 (0.4)           | 2 (0.5)         | 8 (0.4)            |
| <b>Azithromycin - no (%)</b>                             | 1322 (29.4)         | 51 (19.3)         | 118 (31.3)      | 374 (16.6)         |
| <b>Other antibiotics - no (%)</b>                        | 3382 (75.2)         | 160 (60.6)        | 214 (56.8)      | 1082 (48)          |
| <b>Steroids - no (%)</b>                                 | 1485 (33)           | 71 (26.9)         | 195 (51.7)      | 1462 (64.9)        |
| <b>Angiotensin-converting-enzyme Inhibitors - no (%)</b> | 318 (7.1)           | 36 (13.6)         | 51 (13.5)       | 269 (11.9)         |
| <b>Angiotensin II receptor blockers - no (%)</b>         | 264 (5.9)           | 23 (8.7)          | 32 (8.5)        | 212 (9.4)          |
| <b>Statin - no (%)</b>                                   | 1478 (32.9)         | 109 (41.3)        | 129 (34.2)      | 1002 (44.5)        |
| <b>Therapeutic anticoagulation - no (%)</b>              | 1041/4496<br>(31.2) | 76 (28.8)         | 98 (26.0)       | 772 (34.3)         |
| <b>Remdesivir* - no (%)</b>                              | 78 (1.7)            | 37 (14)           | 134 (35.5)      | 1224 (54.3)        |
| <b>Lopinavir/Ritonavir – no (%)</b>                      | 40 (0.9)            | 0 (0)             | 0 (0)           | 0 (0)              |
| <b>Ivermectin – no (%)</b>                               | 11 (0.2)            | 1 (0.4)           | 0 (0)           | 34 (1.5)           |

\* 45 patients listed as remdesivir recipients in the spring season were part of a 1:1 double-blind, placebo-controlled study. Instead, all the patients in summer, fall, and winter seasons listed as remdesivir recipients received the actual medication.



Supplemental Figure 1 - Distribution of Propensity Score

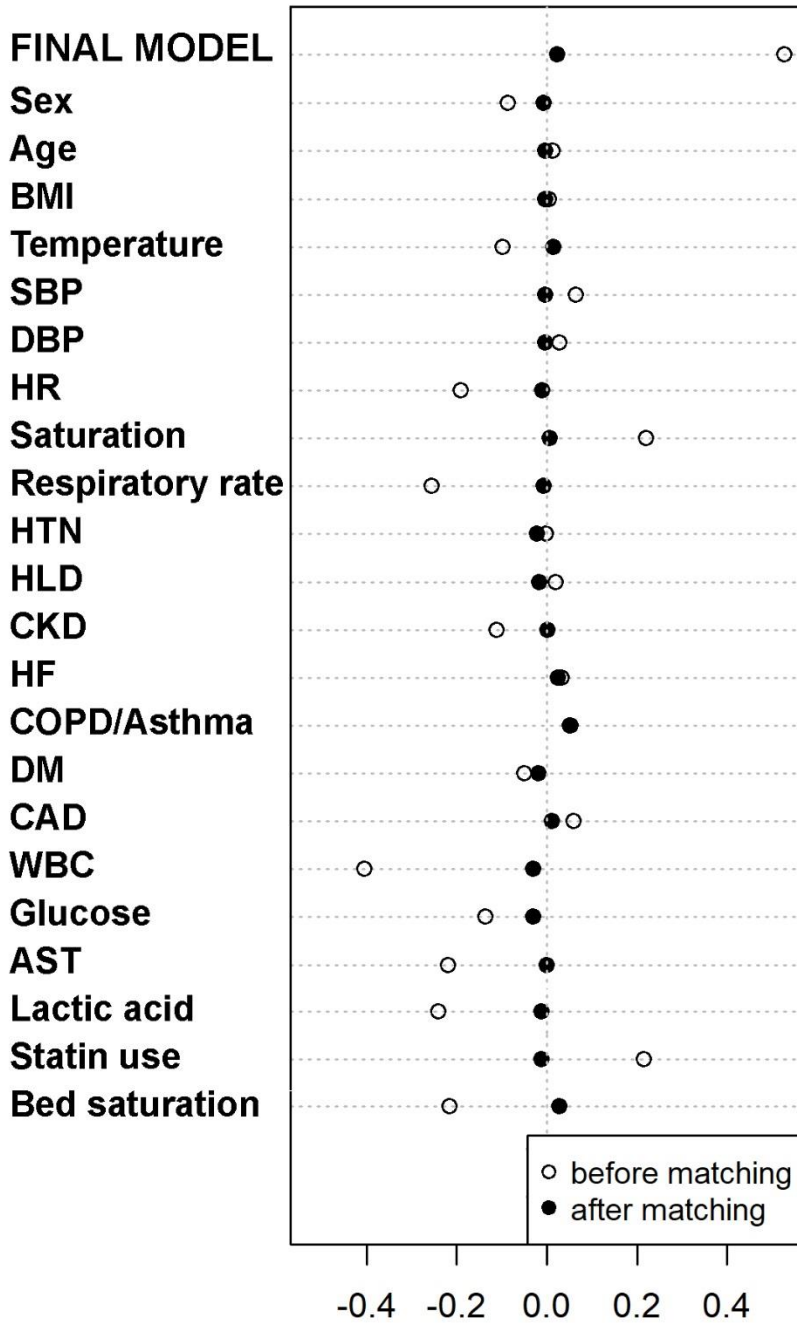

AST = aspartate transaminase; BMI= body mass index; CAD= coronary artery disease; COPD = chronic obstructive pulmonary disease; CKD = chronic kidney disease; DBP= diastolic blood pressure; DM = Diabetes mellitus; HF= heart failure; HLD = hyperlipidemia; HNT = hypertension; HR = heart rate; SBP = systolic blood pressure; WBC = white blood cell count

STROBE Statement—Checklist of items that should be included in reports of *cohort studies*

|                              | Item No | Recommendation                                                                                                                                                                                                                                                                                                         | Page No         |
|------------------------------|---------|------------------------------------------------------------------------------------------------------------------------------------------------------------------------------------------------------------------------------------------------------------------------------------------------------------------------|-----------------|
| <b>Title and abstract</b>    | 1       | (a) Indicate the study's design with a commonly used term in the title or the abstract                                                                                                                                                                                                                                 | 1               |
|                              |         | (b) Provide in the abstract an informative and balanced summary of what was done and what was found                                                                                                                                                                                                                    | 2               |
| <b>Introduction</b>          |         |                                                                                                                                                                                                                                                                                                                        |                 |
| Background/rationale         | 2       | Explain the scientific background and rationale for the investigation being reported                                                                                                                                                                                                                                   | 4               |
| Objectives                   | 3       | State specific objectives, including any prespecified hypotheses                                                                                                                                                                                                                                                       | 4               |
| <b>Methods</b>               |         |                                                                                                                                                                                                                                                                                                                        |                 |
| Study design                 | 4       | Present key elements of study design early in the paper                                                                                                                                                                                                                                                                | 4-5             |
| Setting                      | 5       | Describe the setting, locations, and relevant dates, including periods of recruitment, exposure, follow-up, and data collection                                                                                                                                                                                        | 4-5             |
| Participants                 | 6       | (a) Give the eligibility criteria, and the sources and methods of selection of participants. Describe methods of follow-up<br>(b) For matched studies, give matching criteria and number of exposed and unexposed                                                                                                      | 4-5             |
| Variables                    | 7       | Clearly define all outcomes, exposures, predictors, potential confounders, and effect modifiers. Give diagnostic criteria, if applicable                                                                                                                                                                               | 5<br>Supp       |
| Data sources/<br>measurement | 8*      | For each variable of interest, give sources of data and details of methods of assessment (measurement). Describe comparability of assessment methods if there is more than one group                                                                                                                                   | 4-5             |
| Bias                         | 9       | Describe any efforts to address potential sources of bias                                                                                                                                                                                                                                                              | 12-<br>13       |
| Study size                   | 10      | Explain how the study size was arrived at                                                                                                                                                                                                                                                                              | 4-5             |
| Quantitative variables       | 11      | Explain how quantitative variables were handled in the analyses. If applicable, describe which groupings were chosen and why                                                                                                                                                                                           | 4-5             |
| Statistical methods          | 12      | (a) Describe all statistical methods, including those used to control for confounding<br>(b) Describe any methods used to examine subgroups and interactions<br>(c) Explain how missing data were addressed<br>(d) If applicable, explain how loss to follow-up was addressed<br>(e) Describe any sensitivity analyses | 5-6<br><br>Supp |
| <b>Results</b>               |         |                                                                                                                                                                                                                                                                                                                        |                 |
| Participants                 | 13*     | (a) Report numbers of individuals at each stage of study—eg numbers potentially eligible, examined for eligibility, confirmed eligible, included in the study, completing follow-up, and analysed<br>(b) Give reasons for non-participation at each stage<br>(c) Consider use of a flow diagram                        | 6-7             |
| Descriptive data             | 14*     | (a) Give characteristics of study participants (eg demographic, clinical, social) and information on exposures and potential confounders<br>(b) Indicate number of participants with missing data for each variable of interest<br>(c) Summarise follow-up time (eg, average and total amount)                         | 6-9             |
| Outcome data                 | 15*     | Report numbers of outcome events or summary measures over time                                                                                                                                                                                                                                                         | 8-9             |

|    |                          |    |                                                                                                                                                                                                              |       |
|----|--------------------------|----|--------------------------------------------------------------------------------------------------------------------------------------------------------------------------------------------------------------|-------|
| 1  | Main results             | 16 | (a) Give unadjusted estimates and, if applicable, confounder-adjusted estimates and their precision (eg, 95% confidence interval). Make clear which confounders were adjusted for and why they were included | 6-9   |
| 2  |                          |    | (b) Report category boundaries when continuous variables were categorized                                                                                                                                    |       |
| 3  |                          |    | (c) If relevant, consider translating estimates of relative risk into absolute risk for a meaningful time period                                                                                             |       |
| 4  | Other analyses           | 17 | Report other analyses done—eg analyses of subgroups and interactions, and sensitivity analyses                                                                                                               | 9     |
| 5  | <b>Discussion</b>        |    |                                                                                                                                                                                                              |       |
| 6  | Key results              | 18 | Summarise key results with reference to study objectives                                                                                                                                                     | 9     |
| 7  | Limitations              | 19 | Discuss limitations of the study, taking into account sources of potential bias or imprecision. Discuss both direction and magnitude of any potential bias                                                   | 12-13 |
| 8  | Interpretation           | 20 | Give a cautious overall interpretation of results considering objectives, limitations, multiplicity of analyses, results from similar studies, and other relevant evidence                                   | 9-11  |
| 9  | Generalisability         | 21 | Discuss the generalisability (external validity) of the study results                                                                                                                                        | 14    |
| 10 | <b>Other information</b> |    |                                                                                                                                                                                                              |       |
| 11 | Funding                  | 22 | Give the source of funding and the role of the funders for the present study and, if applicable, for the original study on which the present article is based                                                | 15    |

\*Give information separately for exposed and unexposed groups.

**Note:** An Explanation and Elaboration article discusses each checklist item and gives methodological background and published examples of transparent reporting. The STROBE checklist is best used in conjunction with this article (freely available on the Web sites of PLoS Medicine at <http://www.plosmedicine.org/>, Annals of Internal Medicine at <http://www.annals.org/>, and Epidemiology at <http://www.epidem.com/>). Information on the STROBE Initiative is available at <http://www.strobe-statement.org>.

# BMJ Open

## Hospital Bed Occupancy Rate is An Independent Risk Factor for COVID-19 Inpatient Mortality: A Pandemic Epicenter Cohort Study

|                                 |                                                                                                                                                                                                                                                                                                                                                                                                                                                                                                                                                                                                                                                                                                                                                                                                                                                               |
|---------------------------------|---------------------------------------------------------------------------------------------------------------------------------------------------------------------------------------------------------------------------------------------------------------------------------------------------------------------------------------------------------------------------------------------------------------------------------------------------------------------------------------------------------------------------------------------------------------------------------------------------------------------------------------------------------------------------------------------------------------------------------------------------------------------------------------------------------------------------------------------------------------|
| Journal:                        | <i>BMJ Open</i>                                                                                                                                                                                                                                                                                                                                                                                                                                                                                                                                                                                                                                                                                                                                                                                                                                               |
| Manuscript ID                   | bmjopen-2021-058171.R2                                                                                                                                                                                                                                                                                                                                                                                                                                                                                                                                                                                                                                                                                                                                                                                                                                        |
| Article Type:                   | Original research                                                                                                                                                                                                                                                                                                                                                                                                                                                                                                                                                                                                                                                                                                                                                                                                                                             |
| Date Submitted by the Author:   | 08-Jan-2022                                                                                                                                                                                                                                                                                                                                                                                                                                                                                                                                                                                                                                                                                                                                                                                                                                                   |
| Complete List of Authors:       | Castagna, Francesco; Montefiore Medical Center; Albert Einstein College of Medicine<br>Xue, Xiaonan; Albert Einstein College of Medicine, Department of Epidemiology and Population Health<br>Saeed, O; Albert Einstein College of Medicine; Montefiore Medical Center<br>Kataria, Rachna ; Massachusetts General Hospital<br>Puius, Yoram; Albert Einstein College of Medicine; Montefiore Medical Center<br>Patel, Snehal; Albert Einstein College of Medicine; Montefiore Medical Center<br>Garcia, Mario; Albert Einstein College of Medicine; Montefiore Medical Center<br>Racine, Andrew D. ; Albert Einstein College of Medicine, Department of Pediatrics; Montefiore Medical Center<br>Sims, Daniel; Albert Einstein College of Medicine; Montefiore Medical Center<br>Jorde, Ulrich; Albert Einstein College of Medicine; Montefiore Medical Center |
| <b>Primary Subject Heading</b>: | Public health                                                                                                                                                                                                                                                                                                                                                                                                                                                                                                                                                                                                                                                                                                                                                                                                                                                 |
| Secondary Subject Heading:      | Health policy, Infectious diseases, Public health                                                                                                                                                                                                                                                                                                                                                                                                                                                                                                                                                                                                                                                                                                                                                                                                             |
| Keywords:                       | COVID-19, Public health < INFECTIOUS DISEASES, EPIDEMIOLOGY                                                                                                                                                                                                                                                                                                                                                                                                                                                                                                                                                                                                                                                                                                                                                                                                   |
|                                 |                                                                                                                                                                                                                                                                                                                                                                                                                                                                                                                                                                                                                                                                                                                                                                                                                                                               |

SCHOLARONE™  
Manuscripts



I, the Submitting Author has the right to grant and does grant on behalf of all authors of the Work (as defined in the below author licence), an exclusive licence and/or a non-exclusive licence for contributions from authors who are: i) UK Crown employees; ii) where BMJ has agreed a CC-BY licence shall apply, and/or iii) in accordance with the terms applicable for US Federal Government officers or employees acting as part of their official duties; on a worldwide, perpetual, irrevocable, royalty-free basis to BMJ Publishing Group Ltd ("BMJ") its licensees and where the relevant Journal is co-owned by BMJ to the co-owners of the Journal, to publish the Work in this journal and any other BMJ products and to exploit all rights, as set out in our [licence](#).

The Submitting Author accepts and understands that any supply made under these terms is made by BMJ to the Submitting Author unless you are acting as an employee on behalf of your employer or a postgraduate student of an affiliated institution which is paying any applicable article publishing charge ("APC") for Open Access articles. Where the Submitting Author wishes to make the Work available on an Open Access basis (and intends to pay the relevant APC), the terms of reuse of such Open Access shall be governed by a Creative Commons licence – details of these licences and which [Creative Commons](#) licence will apply to this Work are set out in our licence referred to above.

Other than as permitted in any relevant BMJ Author's Self Archiving Policies, I confirm this Work has not been accepted for publication elsewhere, is not being considered for publication elsewhere and does not duplicate material already published. I confirm all authors consent to publication of this Work and authorise the granting of this licence.

# Hospital Bed Occupancy Rate is An Independent Risk Factor for COVID-19 Inpatient Mortality: A Pandemic Epicenter Cohort Study

Francesco Castagna MD<sup>1</sup>, Xiaonan Xue PhD<sup>2</sup>, Omar Saeed MD<sup>1</sup>, Rachna Kataria MD<sup>3</sup>, Yoram A Puius MD PhD<sup>4</sup>, Snehal R Patel MD<sup>1</sup>, Mario J Garcia MD<sup>1</sup>, Andrew D Racine MD<sup>5</sup>, Daniel B Sims MD<sup>1</sup>, Ulrich P Jorde MD<sup>1</sup>

## Affiliations:

<sup>1</sup> Division of Cardiology, Montefiore Medical Center and Albert Einstein College of Medicine, Bronx, NY

<sup>2</sup> Department of Epidemiology and Population Health, Albert Einstein College of Medicine, Bronx, NY

<sup>3</sup> Division of Cardiology, Massachusetts General Hospital and Harvard Medical School, Boston, MA

<sup>4</sup> Division of Infectious Diseases, Montefiore Medical Center and Albert Einstein College of Medicine, Bronx, NY

<sup>5</sup> Department of Pediatrics, Montefiore Medical Center and Albert Einstein College of Medicine, Bronx, New York.

Word count: 3,091

## Corresponding Author:

Ulrich P. Jorde, MD  
Professor of Medicine

Division of Cardiology - Department of Medicine - Montefiore Medical Center  
3400 Bainbridge Ave. 7<sup>th</sup> floor Bronx, NY  
Email: [ujorde@montefiore.org](mailto:ujorde@montefiore.org)

1  
2  
3 **27 Abstract**  
4  
5

6 **28 Introduction:** COVID-19 first struck New York City in the spring of 2020 resulting in an  
7  
8 **29** unprecedented strain on our health care system triggering multiple changes in public health  
9  
10  
11 **30** policy governing hospital operations as well as therapeutic approaches to COVID-19. We  
12  
13 **31** examined inpatient mortality at our center throughout the course of the pandemic.  
14  
15

16 **32 Methods:** Retrospective chart review of clinical characteristics, treatments, and outcome data of  
17  
18 **33** all patients admitted with COVID-19 from March 1<sup>st</sup>, 2020 to February 28<sup>th</sup>, 2021. Patients were  
19  
20  
21 **34** grouped into three-month quartiles. Hospital strain was assessed as percent of occupied beds  
22  
23 **35** based on a normal bed capacity of 1,491.  
24  
25

26 **36 Results:** Inpatient mortality decreased from 25.0% in spring to 10.8% over the course of the  
27  
28 **37** year. During this time, the use of Remdesivir, steroids, and anticoagulants increased; the use of  
29  
30 **38** hydroxychloroquine and other antibiotics decreased. Daily bed occupancy ranged from 62% to  
31  
32  
33 **39** 118% occupancy. In a multivariate model with all year's data controlling for demographics,  
34  
35 **40** comorbidities, and acuity of illness, percentage of bed occupancy was associated with increased  
36  
37 **41** 30-day in-hospital mortality of COVID-19 patients (0.7% mortality increase for each 1%  
38  
39 **42** increase in bed occupancy - HR 1.007, CI: 1.001, 1.013, p=0.004)  
40  
41  
42

43 **43 Conclusion:** Inpatient mortality from COVID-19 was associated with bed occupancy. Early  
44  
45 **44** reduction in epicenter hospital bed occupancy to accommodate acutely ill and resource-intensive  
46  
47 **45** patients should be a critical component in the strategic planning for future pandemics.  
48  
49

50 **46**  
51  
52  
53  
54  
55  
56  
57  
58  
59  
60

1  
2  
3 47 **Strengths and limitations of this study**  
4  
5

- 6 48 • Large cohort study (7,390 COVID-19 patients).  
7  
8 49 • Longitudinal analysis over 1 year of management and hospital policy changes.  
9  
10  
11 50 • Analysis of mortality changes after adjustment for different therapies and clinical  
12  
13 51 parameters.  
14  
15 52 • Identification of the association between level of hospital system stress and mortality,  
16  
17 with important public health ramifications.  
18 53  
19  
20 54 • Limitation: data on most recent variants are not included  
21  
22  
23 55  
24  
25  
26  
27  
28  
29  
30  
31  
32  
33  
34  
35  
36  
37  
38  
39  
40  
41  
42  
43  
44  
45  
46  
47  
48  
49  
50  
51  
52  
53  
54  
55  
56  
57  
58  
59  
60



## 56 INTRODUCTION

57 Coronavirus disease 2019 (COVID-19) was declared a global pandemic by the World Health  
58 Organization on March 11<sup>th</sup>, 2020.<sup>1</sup> In the United States, after a cluster of cases reported from  
59 Washington state<sup>2</sup>, New York state quickly became the initial epicenter of this pandemic with  
60 over 1.27 million of cases till date and over 50,000 fatalities with the highest concentration in the  
61 Bronx and Queens boroughs of New York City.<sup>3</sup> Montefiore Einstein, with its three principal  
62 teaching hospitals and combined adult bed capacity of 1,491, is the primary health care provider  
63 for the large, nearly 1.5 million diverse population of the Bronx<sup>4</sup> and experienced a “first wave”  
64 of COVID-19 admissions in the spring of 2020<sup>3</sup>, followed by a significant reduction of cases  
65 until a second surge in hospitalizations was noted in the winter of 2020. Throughout the course  
66 of the year, multiple public health measures - including those adapting hospital operation to a  
67 disaster level pandemic, such as cancellation of all elective procedures and waiver of state  
68 specific licensing for health care providers - were put in place. In addition, the understanding of  
69 COVID-19 pathophysiology improved<sup>5,6</sup>, new treatments were developed<sup>7-10</sup>, parts of the  
70 general population<sup>11,12</sup> as well as hospital personnel developed antibodies after COVID-19  
71 illness<sup>13</sup>, and our hospital system adapted to and then recovered from crisis mode.<sup>14</sup> Here, we  
72 report outcomes of patients hospitalized with COVID-19 through one year since the first case,  
73 focusing on the differences observed between the spring and the winter surges.

## 75 METHODS:

### 76 Study Population

77 We retrospectively reviewed all adult patients admitted to Montefiore Medical Center with a real  
78 time reverse transcription polymerase chain reaction (RT-PCR) assay positive for COVID-19

1  
2  
3 79 between March 1, 2020 and February 28, 2021. We divided this timeframe in four 3-month  
4  
5 80 seasons based on northern hemisphere calendar: spring (March 1, 2020 to May 31, 2020),  
6  
7 81 summer (June 1, 2020 to August 30, 2020), fall (September 1, 2020 to November 30, 2020), and  
8  
9 82 winter (December 1, 2020 to February 28, 2021).  
10  
11  
12  
13

### 14 84 **Data Collection**

15  
16  
17 85 Medical data including demographic, clinical, and laboratory variables were extracted from the  
18  
19 86 electronic medical record system. The primary outcome was 30-day in-hospital mortality.  
20  
21  
22  
23

### 24 88 **Statistical Analysis**

25  
26 89 Continuous variables are displayed as mean  $\pm$  standard deviation or median [25-75%  
27  
28 90 interquartile range] and compared with the Student's t-test, or Wilcoxon ranks-sum, as  
29  
30 91 appropriate. Categorical data are presented as percent and compared by the chi-squared test. We  
31  
32 92 estimated the cumulative incidence of the primary endpoint in-hospital mortality for each season,  
33  
34 93 treating hospital discharge as a competing event.<sup>15</sup> To avoid any bias due to differential follow-  
35  
36 94 up length, we censored the follow-up time at 30 days after the admission.  
37  
38  
39

40 95 A multivariable competing risk proportional hazard models was used to estimate the sub-  
41  
42 96 distribution hazard ratios<sup>16 17</sup> for time to in-hospital death. The covariates in the multivariable  
43  
44 97 analyses included factors present in > 90% of our dataset, known to be associated with in-  
45  
46 98 hospital COVID-19 mortality based on prior literature<sup>6 18 19</sup>, or with a univariate association with  
47  
48 99 in-hospital mortality ( $p < 0.05$ ) and a clinical (relative difference >5%) difference between  
49  
50 100 survivors and non survivors (**Supplemental Table 1**). These variables included: age, sex, body  
51  
52 101 mass index (BMI), vital signs at presentation (temperature, systolic and diastolic blood pressure,  
53  
54  
55  
56  
57  
58  
59  
60

1  
2  
3 102 heart rate, respiratory rate, pulse oxygen saturation), platelet count, white cell count, potassium,  
4  
5 103 bicarbonate, creatinine, glucose, alanine transaminase, aspartate transaminase, history of  
6  
7  
8 104 hypertension, dyslipidemia, chronic kidney disease (CKD), heart failure, coronary artery disease,  
9  
10 105 asthma/chronic obstructive pulmonary disease, diabetes mellitus and statin use. Additionally,  
11  
12 106 lactic acid level and percent of hospital bed saturation were forced into the model as marker of  
13  
14  
15 107 illness severity and level of hospital stress, respectively.  
16  
17

18 108  
19  
20 109 Then we focused on examining the difference in in-hospital death between patients admitted in  
21  
22 110 the spring and in the winter, as they represented the two largest and most temporal distant waves  
23  
24 111 of the COVID-19 pandemic occurring before and after public health polices, specific therapeutic  
25  
26 112 approaches and hospital management changes had been implemented. Selection method for  
27  
28 113 covariates is presented in the **Supplemental Material** and **Supplemental Table 2**.

29  
30  
31 114 The proportionality assumption was examined<sup>20</sup> and no violation was identified. A two-sided  
32  
33 115  $p < 0.05$  was considered statistically significant.  
34  
35

36 116

### 37 38 117 **Propensity Score Analysis**

39  
40  
41 118 To fully control the potential differences in patient population and hospital stress between spring  
42  
43 119 and winter COVID-19 patients, we also used propensity score (PS) matching to compare the 30-  
44  
45 120 day in-hospital mortality between spring and winter admissions. The same covariates used for  
46  
47 121 the multivariable competing risk regression were used for PS matching. PS matching was carried  
48  
49 122 out through a 1:1 greedy matching algorithm, with a caliper width of 0.1 SD. We then stratified  
50  
51 123 on matched pair in the competing risk regression model.<sup>21 22</sup> Because one-to-one matching led to  
52  
53 124 a reduction in sample size, we used this analysis as a sensitivity analysis.  
54  
55  
56  
57  
58  
59  
60

1  
2  
3 125 All statistical analyses was performed with SPSS (IBM Corp, ver. 25, Armonk, NY) and the R  
4  
5 126 packages cmprsk and crrSC (R Foundation for Statistical Computing, ver 3.5)  
6  
7

8 127

## 9 10 128 **Patient and Public Involvement**

11  
12 129 Given the retrospective nature of our analysis, it was not appropriate or possible to involve  
13  
14 130 patients or the public in the design, or conduct, or reporting, or dissemination plans of our  
15  
16 131 research.  
17  
18

19 132

## 20 21 133 **RESULTS**

22  
23 134 7,390 COVID-19 positive adult patients were admitted between March 1, 2020 and February 28,  
24  
25 135 2021 (**Figure 1**). 4,495 patients were admitted during the spring, 264 during the summer, 377  
26  
27 136 during the fall, and 2,254 during the winter.  
28  
29

30  
31 137 On April 8, 2020, peak of the spring season, the total numbers of simultaneously adult patients  
32  
33 138 admitted to our hospital (including those admitted to emergency adult wards at our children's  
34  
35 139 hospital<sup>23</sup>) was 1,762 (118% of nominal bed capacity); 1,201 of them (68.2%) were COVID-19  
36  
37 140 patients. On February 8, 2021, peak of winter season, 1,512 patients (101% of nominal bed  
38  
39 141 capacity) were admitted to our hospital and 393 of them (26.0%) were COVID-19 patients.  
40  
41

42 142 (**Figure 1**). Following cancellation of elective procedures, bed occupancy decreased to 70% by  
43  
44 143 the end of the spring season and remained at 90% until the beginning of the winter season, when  
45  
46 144 the second wave occurred in December 2020. Unadjusted mortality for patient admitted at the  
47  
48 145 beginning of spring, end of spring, beginning of winter, and end of winter was 28%, 8%, 14%,  
49  
50 146 and 13%, respectively (**Figure 2**).  
51  
52

53  
54 147  
55  
56  
57  
58  
59  
60

## 148 **Patient Population**

149 Demographics, past medical history, vital signs at arrivals are presented in **Table 1**. Initial  
150 laboratory blood tests are presented in **Supplemental Table 3**. Overall, median age was 66 (55 –  
151 77) years, 3,835 (51.9%) patients were male, 5,519 (74.2%) were of Black race and/or Hispanic  
152 ethnicity. Median age ranged from 63 years (fall) to 67 years (spring). Sex distribution was  
153 similar throughout the year. Summer and fall patients had the lowest and the highest BMI: 26.7  
154 and 28.6 kg/m<sup>2</sup>, respectively.

## 156 **Pharmacotherapy**

157 Changes in pharmacological approach is presented in **Supplemental Table 4** and **Figure 3**.  
158 Spring patients were more likely to receive hydroxychloroquine, azithromycin and other  
159 antibiotics. The use of Remdesivir substantially increased throughout the year (from less than 2%  
160 during spring to almost 70% by the end of the winter). Steroids prescription (from 33% during  
161 spring to almost 70% in February 2021), therapeutic anticoagulation therapy, as well as use of  
162 statins, angiotensin converting inhibitors (ACE-I), or angiotensin receptor blockers (ARBs) also  
163 increased.

## 165 **Death, Intubation, and Length of Stay**

166 Over the course of a year, 1,437 (19.4%) died while hospitalized. Patients who died were older,  
167 had more comorbidities, and were more acutely ill consistent within prior reports on risk factors  
168 for death in COVID-19<sup>5 6</sup> (**Supplemental Table 1**). Average unadjusted monthly mortality is  
169 presented in **Figure 2**. 30-day in-hospital mortality (**Figure 4A**) was 25.0% for the spring  
170 patients, 11.0% for summer patients, 6.9% for fall patients, and 11.4% for winter patients

1  
2  
3 171 ( $p < 0.001$ ). On average, spring patients died 6.4 (3.2 – 12.9) days after the arrival to the  
4  
5 172 emergency department, summer patients 7.2 (3.0 – 15.7) days after the arrival, fall patients 13.4  
6  
7 173 (8.7 – 21.6) days after arrival, and winter patients 13.3 (6.8 – 20.7) days after the arrival  
8  
9  
10 174 ( $p < 0.001$ ). Frequency of invasive ventilatory support was higher during the spring with 892  
11  
12 175 patients (19.4%) intubated, versus 27 (10.2%) in the summer, 36 (9.5%) during fall, and 268  
13  
14 176 (11.9%) in the winter,  $p < 0.001$ . Median time from arrival-to-intubation was 0.7 (0.1 - 4.1) days  
15  
16 177 for spring patients, 0.6 (0.1 - 8.1) days for summer patients, 2.2 (0.1 – 7.3) days for fall patients,  
17  
18 178 and 2.8 (0.3 – 7.0) days for winter patients,  $p < 0.001$ . Median length of stay was 6.1 (3.5 – 11.1)  
19  
20 179 days during spring, 5.1 (2.7 – 10.1) days during summer, 5.0 (3.0 – 10.1) days during fall, and  
21  
22 180 6.3 (3.8 – 12.0) days during winter,  $p < 0.001$ .

181

## 182 **Bed Saturation and Mortality**

183 We defined bed saturation the percentage of bed occupancy calculated from the ratio between the  
184 number of admitted patients over the nominal bed capacity of our institution (1,491).

185 In the multivariable competing risk proportional hazard model of the entire cohort, percent of  
186 bed occupancy was associated with increased 30-day in-hospital mortality (HR 1.007, CI: 1.001,  
187 1.013,  $p = 0.004$ ); i.e mortality increase by 0.7 % for each 1% increase of bed occupancy.

188 Consistent results were observed per level increase in bed occupancy quartile, (HR 1.086 [1.026  
189 -1.148], P-value for linear trend = 0.004). Results of the competing risk regression analysis are  
190 presented in the **Table 2**.

191

## 192 **Spring vs Winter Mortality Comparison and Propensity Matched Analysis**

1  
2  
3 193 In the multivariable competing risk proportional hazard model comparing spring and winter  
4  
5 194 season, 30-day in-hospital mortality was lower in winter (HR 0.520, CI 0.448-0.604,  $p < 0.001$ )  
6  
7  
8 195 when compared to spring. After PS caliper matching, there were 1,722 matched pairs. Spring and  
9  
10 196 winter patients had similar distribution of PS (**Supplemental Figure 1**) and standardized average  
11  
12 197 difference among covariates was greatly reduced. PS analysis showed a significant reduction of  
13  
14  
15 198 in-hospital mortality during winter (HR 0.580 CI: 0.507-0.663,  $p < 0.001$ ) confirming what we  
16  
17 199 observed in the multivariable adjusted analysis (**Figure 4B**).  
18  
19  
20  
21

## 201 **DISCUSSION**

202 We examined inpatient mortality from COVID-19 over the course of a one-year pandemic at our  
203 hospital system in New York City. Our principal findings are as follows: First, we observed a  
204 substantial reduction of in-hospital mortality coinciding with multiple pandemic related public  
205 health measures focusing on hospital resource management – and preceding comprehensive  
206 changes in pharmacotherapy - towards the end of the first surge. Second, we describe - for the  
207 first time - hospital bed occupancy as an independent risk factor for inpatient mortality from  
208 COVID-19.  
209

### 210 **Public Health Measures in Response to COVID-19**

211 After declaring a state of disaster emergency (March 7, 2020), New York State introduced  
212 different measures to limit the spread of the disease, including public schools closure (March 16,  
213 2020), limitation of indoor dining (March 17, 2020), stay-home order for non-essential workers  
214 (March 22, 2020), mandatory face coverings in public (April 15, 2020), and night subway  
215 closure (April 30, 2020)<sup>24</sup>. Despite these measures to limit the diffusion of the disease and a

1  
2  
3 216 generalized reduction of movements around New York City (as evidenced by a more than 90%  
4  
5 217 reduction of subway ridership compared to 2019)<sup>25</sup>, more than 30% of Bronx residents were  
6  
7 218 found to have positive antibodies (and thus possibly temporary immunity) against SARS-CoV-2  
8  
9 219 in August 2020.<sup>26</sup>  
10  
11  
12 220 Specifically relevant to hospital operations, executive order no. 202.5 (March 16, 2020)<sup>27</sup>  
13  
14 221 allowed healthcare providers not licensed or registered in New York State to temporarily work in  
15  
16 222 the State, and executive order no. 202.10 (March 22, 2020)<sup>27</sup> suspended elective operations.  
17  
18 223 These executive orders were associated with a dramatic drop in non-COVID-19 admissions at  
19  
20 224 our institution beginning March 16, 2020. (**Figure 1**). On March 26, 2020 New York State  
21  
22 225 Governor Cuomo additionally mandated all hospitals to increase their bed capacity by 50% to  
23  
24 226 accommodate the surge of COVID-19 patients.<sup>27</sup> Despite this order, the actual bed occupancy at  
25  
26 227 our institution (while accommodating all COVID-19 patients presenting to our hospitals)  
27  
28 228 remained below the usual operating capacity until December 2020.  
29  
30  
31 229 Notably, COVID-19 mortality remained stable throughout the summer and fall 2020 with low  
32  
33 230 case counts and increased utilization of steroids, anticoagulation, and remdesivir. Although  
34  
35 231 randomized controlled trials have shown morbidity benefits with the use of remdesivir<sup>7</sup> and  
36  
37 232 mortality reduction with steroids<sup>8</sup>, the magnitude of these effects cannot explain the more than  
38  
39 233 50% reduction in mortality we observed. Furthermore, pharmacotherapy, with the exception of  
40  
41 234 hydroxychloroquine elimination, did not materially change within the spring season, by the end  
42  
43 235 of which mortality was already decreased. Steroid, remdesivir, and therapeutic anticoagulation  
44  
45 236 were used in 10-20% of patients by May 2020, but they reached 30-70% only in the winter  
46  
47 237 season. Despite that, unadjusted mortality began to increase again in December 2020 during the  
48  
49  
50  
51  
52  
53  
54  
55  
56  
57  
58  
59  
60



238 second wave. Of note, bed occupancy also increased at that time and proved to be an  
239 independent risk factor for COVID-19 mortality in our cohort of nearly 8,000 patients.

240

### 241 **Change in Therapeutic Approach**

242 The initial widespread (>2/3 of first spring patients) use of hydroxychloroquine, an agent  
243 eventually proven to be ineffective<sup>28</sup> to treat COVID-19, probably represents the most obvious  
244 pandemic-associated deviation from the usual multiphase clinical trial standards of therapeutic  
245 paradigm development. Only 8 of 2,254 patients received hydroxychloroquine during the winter  
246 wave. Similarly, we observed a reduction in the use of azithromycin and other antibiotics, the  
247 latter possibly reflecting a more careful assessment of the need to treat superimposed bacterial  
248 infections during the second wave. Steroid therapy<sup>8 29</sup> and therapeutic anticoagulation<sup>9</sup> were  
249 implemented in the majority of patients during the winter after the knowledge on the likely  
250 disease modulating inflammatory properties and pro-thrombotic effect of COVID-19 had been  
251 recognized<sup>30</sup> and, in the case of steroids, a therapeutic effect had been proven<sup>8</sup>. Remdesivir, an  
252 inhibitor of the viral RNA-dependent RNA polymerase that showed shortening of recovery time  
253 in hospitalized patients with COVID-19<sup>7</sup>, received emergency FDA approval on October  
254 22<sup>nd</sup>, 2020<sup>31</sup> and was administered to almost half of the admitted patients during the winter. If  
255 initial concerns of possible interactions between ACE-I or ARBs and SARS-CoV-2<sup>32</sup> led to a  
256 possible underutilization or discontinuation of these drugs during the spring, we observed a  
257 significant increase in their use during the following months, after no increased risks were  
258 reported.<sup>33 34</sup>

259 Similarly, after several reports showed a possible protective effect associated with the use of  
260 statins<sup>35 36</sup>, their utilization markedly increased during the winter.

1  
2  
3 261 Lastly, after the spring wave provided anecdotal evidence for early proning in COVID-19  
4  
5 262 pneumonia, an approach strongly favoring noninvasive ventilation and avoiding intubation was  
6  
7 263 developed to address respiratory distress in COVID-19; more data about such an approach has  
8  
9  
10 264 since accumulated.<sup>10 37</sup> The cumulative effect of these therapeutic changes, in combination with  
11  
12 265 a better preparedness to respond to a pandemic, can be estimate from the different mortality  
13  
14 266 between the first surge (spring) and the second surge (winter). After matching the two groups for  
15  
16 267 demographic and clinical variables, as well as for elements indicative of hospital distress (bed  
17  
18 268 occupancy), a significant reduction of mortality was observed during the winter trimester.  
19  
20  
21  
22  
23

### 24 270 **Change in Hospital Stress Load**

25  
26 271 At the peak of the pandemic, the hospital saturation reached the 118% of the nominal bed  
27  
28 272 capacity and COVID-19 patients accounted for 68.2% of all admitted patients. This increase in  
29  
30 273 acutely ill patients created significant excess demand on the rest of the hospital infrastructure  
31  
32 274 best characterized by the surge in the need for intensive care unit (ICU) beds and transformation  
33  
34 275 of other hospital areas to ICUs.<sup>14 23</sup> Despite increased patient load, the number of standard ICU  
35  
36 276 beds, as well as laboratories, diagnostic equipment, and available personnel, remained the same  
37  
38 277 as before the pandemic. This unmatched patient overload resulted in a 0.7 % mortality increase  
39  
40 278 for each 1% increment in hospital bed saturation. In light of these results, strategies to minimize  
41  
42 279 the bed occupancy for non-Covid-19 patients or non-life-saving admission should be adopted to  
43  
44 280 diverge resources to improve the outcome of admitted Covid-19 patients.  
45  
46  
47  
48  
49  
50

### 51 282 **Limitations**

52  
53  
54  
55  
56  
57  
58  
59  
60

1  
2  
3 283 Our study has the shortcomings of a retrospective investigation, but there are some very specific  
4  
5 284 aspects limiting the interpretation of our results. First, it is difficult to assess the true effects of  
6  
7  
8 285 pharmacotherapy given the dynamic changes in indications, doses, and usage that happened over  
9  
10 286 the course of the year. Regardless, we believe the propensity-matched comparison between the  
11  
12 287 spring and the winter waves provides compelling evidence for the validity of our principal  
13  
14 288 observation of inpatient COVID-19 mortality reduction disproportionate to advances in  
15  
16 289 pharmacotherapy. We chose total bed occupancy as a metric for hospital stress assuming that  
17  
18 290 other resources per bed remained static. Notably, the ratio of COVID-19 to non-COVID-19  
19  
20 291 patients, ICU bed saturation, and staff shortages are unaccounted for in this model. Regrettably,  
21  
22 292 an in-depth analysis of these metrics is beyond our ability in this retrospective pandemic analysis  
23  
24 293 with disaster elements. Additionally, a significant number of patients received ICU-level-of-care  
25  
26 294 interventions (mechanical ventilatory support, dialysis, vasopressors titration) on regular floors;  
27  
28 295 therefore, the concept of ICU bed saturation might have been not truly representative of the  
29  
30 296 burden.  
31  
32  
33  
34  
35 297 However, we feel our data is sufficiently strong to support the notion that bed capacity expansion  
36  
37 298 alone is not the answer. Rather, a smaller number of beds with higher staffing accomplished by  
38  
39 299 drastic reductions in all non-emergent procedures and activities is likely a better approach.  
40  
41  
42 300 Although offering fewer beds in pandemic situation appears initially quite counterintuitive, in  
43  
44 301 practice we observed that mortality began to decrease once beds and resources were allocated  
45  
46 302 specifically to COVID-19 patients by executive orders 202.5 and 202.10; and most importantly  
47  
48 303 that bed occupancy never exceeded 100% once hospital operations focused on the COVID-19  
49  
50 304 pandemic only. It is conceivable that an uptrend in mortality observed late in the pandemic with  
51  
52 305 established treatment paradigms could be due to new viral strains or a sicker patient population.  
53  
54  
55  
56  
57  
58  
59  
60

1  
2  
3 306 Although we are unable to provide detailed strain analysis for our study population, a meaningful  
4  
5 307 numbers of new (and possibly more virulent) strains were not yet observed in in the Bronx,  
6  
7 308 where our study was conducted.<sup>38</sup> The small sample size of patients in summer and fall does not  
8  
9  
10 309 allow meaningful propensity matched comparisons, and when comparing summer, fall, and  
11  
12 310 winter populations, there do not appear to be clinically meaningful differences. Lastly, single-  
13  
14 311 patient data on vaccination status were not available. At the conclusion of the study, only 13.8%  
15  
16 312 of the population of New York State received at least one dose and 7.4% received two doses<sup>39</sup>.  
17  
18 313 Given the heterogeneous distribution of vaccination within the state (and the city of New York),  
19  
20 314 it is impossible to meaningfully account for these parameters.  
21  
22  
23  
24  
25

## 26 316 **CONCLUSIONS**

27  
28 317 Inpatient mortality from COVID-19 decreased to a degree disproportionate to advances in  
29  
30 318 disease specific therapeutics. Increased bed occupancy was associated to a higher in-hospital  
31  
32 319 mortality. Implementation of non-pharmacological approaches and other seasonal variations  
33  
34 320 might also had a role in the mortality reduction.. Early reduction in epicenter hospital bed  
35  
36 321 occupancy to accommodate acutely ill and resource-intensive patients should be a critical  
37  
38 322 component in the strategic planning for future pandemics.  
39  
40  
41  
42  
43  
44  
45  
46  
47  
48  
49  
50  
51  
52  
53  
54  
55  
56  
57  
58  
59  
60

1  
2  
3 325 **DECLARATIONS**  
4  
5

6 326 **Ethics approval and consent to participate**  
7

8  
9 327 The Office of Human Research Affairs at Albert Einstein College of Medicine approved this  
10  
11 328 study (# 2020-11308). Patient consent and HIPAA forms were waived by our IRB due to the  
12  
13  
14 329 retrospective nature of our research.  
15

16  
17 330 **Consent for publication**  
18

19  
20 331 Non applicable.  
21  
22

23 332 **Availability of data and materials**  
24

25  
26 333 The datasets used and/or analyzed during the current study are available from the corresponding  
27  
28 334 author on reasonable request.  
29  
30

31  
32 335 **Competing interests**  
33

34 336 No conflicts of interest exist.  
35  
36

37 337 **Funding/Support**  
38

39 338 Francesco Castagna is supported by a grant from the National Institute for Health  
40  
41 339 (T32HL144456) and the National Center for Advancing Translational Science (NCATS) Clinical  
42  
43 340 and Translational Science Award at Einstein-Montefiore (UL1TR001073). Omar Saeed is  
44  
45 341 supported by grants from the National Institute for Health/National Heart, Lung and Blood  
46  
47 342 Institute (K23HL145140) and the National Center for Advancing Translational Science  
48  
49 343 (NCATS) Clinical and Translational Science Award at Einstein-Montefiore (UL1TR001073).  
50  
51 344 Ulrich Jorde is supported by the McAdam Family Foundation (award number not applicable).  
52  
53  
54  
55  
56  
57  
58  
59  
60

1  
2  
3 345 **Author's Contributions**  
4

5 346 Design of the project: FC, XX, and UPJ.  
6

7 347 Underlying data verified by FC, XX, and UPJ.  
8

9 348 Acquisition, analysis, and interpretation of data: FC, XX, OS, RK, YAP, SRP, MJG, ADR, DS,  
10 349 and UPJ.  
11

12 350 Statistical analysis: FC and XX.  
13

14 351 Obtained funding: UPJ  
15

16 352 Manuscript writing: FC, XX, and UPJ.  
17

18 353 Critical revision of the manuscript for important intellectual content: FC, XX, OS, RK, YAP,  
19 354 SRP, MJG, ADR, DS, and UPJ.  
20

21 355 Supervision: UPJ  
22

23 356 All the Authors reviewed the work and approved the final version.  
24

25 357 FC and UPJ had full access to all the data in the study and take responsibility for the integrity of  
26 358 the data and the accuracy of the data analysis.  
27

28 359  
29

30 360 **Acknowledgements**  
31

32 361 Not applicable  
33

34 362  
35

36 363  
37

37 364  
38

39 365  
40  
41  
42  
43  
44  
45  
46  
47  
48  
49  
50  
51  
52  
53  
54  
55  
56  
57  
58  
59  
60

366 **References**

- 367 1. World Health Organization. WHO Director-General's opening remarks at the media briefing  
368 on COVID-19-11 March 2020: Geneva, Switzerland, 2020.
- 369 2. Bhatraju PK, Ghassemieh BJ, Nichols M, et al. Covid-19 in Critically Ill Patients in the Seattle  
370 Region — Case Series. *New England Journal of Medicine* 2020;382(21):2012-22. doi:  
371 10.1056/NEJMoa2004500
- 372 3. John Hopkins University. COVID-19 Dashboard by the Center for Systems Science and  
373 Engineering (CSSE) at Johns Hopkins University (JHU): JHU; 2020 [Available from:  
374 <https://coronavirus.jhu.edu/map.html> accessed 1/20/2021.
- 375 4. Lozano R, Naghavi M, Foreman K, et al. Global and regional mortality from 235 causes of  
376 death for 20 age groups in 1990 and 2010: a systematic analysis for the Global Burden of  
377 Disease Study 2010. *Lancet* 2012;380(9859):2095-128. doi: 10.1016/S0140-  
378 6736(12)61728-0 [published Online First: 2012/12/19]
- 379 5. Zhou F, Yu T, Du R, et al. Clinical course and risk factors for mortality of adult inpatients  
380 with COVID-19 in Wuhan, China: a retrospective cohort study. *The Lancet*  
381 2020;395(10229):1054-62. doi: 10.1016/S0140-6736(20)30566-3
- 382 6. Wu Z, McGoogan JM. Characteristics of and Important Lessons From the Coronavirus  
383 Disease 2019 (COVID-19) Outbreak in China: Summary of a Report of 72 314 Cases  
384 From the Chinese Center for Disease Control and Prevention. *Jama* 2020;323(13):1239-  
385 42. doi: 10.1001/jama.2020.2648 [published Online First: 2020/02/25]
- 386 7. Beigel JH, Tomashek KM, Dodd LE, et al. Remdesivir for the Treatment of Covid-19 — Final  
387 Report. *New England Journal of Medicine* 2020;383(19):1813-26. doi:  
388 10.1056/NEJMoa2007764
- 389 8. Group RC, Horby P, Lim WS, et al. Dexamethasone in Hospitalized Patients with Covid-19 -  
390 Preliminary Report. *The New England journal of medicine* 2020 doi:  
391 10.1056/NEJMoa2021436 [published Online First: 2020/07/18]
- 392 9. Thachil J, Tang N, Gando S, et al. ISTH interim guidance on recognition and management of  
393 coagulopathy in COVID-19. *Journal of Thrombosis and Haemostasis* 2020;18(5):1023-  
394 26. doi: <https://doi.org/10.1111/jth.14810>
- 395 10. Shelhamer MC, Wesson PD, Solari IL, et al. Prone Positioning in Moderate to Severe Acute  
396 Respiratory Distress Syndrome Due to COVID-19: A Cohort Study and Analysis of  
397 Physiology. *Journal of intensive care medicine* 2021;36(2):241-52. doi:  
398 10.1177/0885066620980399 [published Online First: 2021/01/01]
- 399 11. Rosenberg ES, Tesoriero JM, Rosenthal EM, et al. Cumulative incidence and diagnosis of  
400 SARS-CoV-2 infection in New York. *Annals of epidemiology* 2020;48:23-29.e4. doi:  
401 10.1016/j.annepidem.2020.06.004 [published Online First: 2020/07/11]
- 402 12. Sekine T, Perez-Potti A, Rivera-Ballesteros O, et al. Robust T Cell Immunity in  
403 Convalescent Individuals with Asymptomatic or Mild COVID-19. *Cell* 2020;183(1):158-  
404 68.e14. doi: <https://doi.org/10.1016/j.cell.2020.08.017>
- 405 13. Fill Malfertheiner S, Brandstetter S, Roth S, et al. Immune response to SARS-CoV-2 in  
406 health care workers following a COVID-19 outbreak: A prospective longitudinal study. *J*  
407 *Clin Virol* 2020;130:104575. doi: 10.1016/j.jcv.2020.104575 [published Online First:  
408 2020/08/18]
- 409 14. Alvarez Villela M, Boucher T, Terre J, et al. Surge-in-Place: Conversion of a Cardiac  
410 Catheterization Laboratory Into a COVID-19 Intensive Care Unit and Back Again. *The*  
411 *Journal of invasive cardiology* 2020 [published Online First: 2020/12/22]



- 1  
2  
3 412 15. Putter H, Fiocco M, Geskus RB. Tutorial in biostatistics: competing risks and multi-state  
4 413 models. *Stat Med* 2007;26(11):2389-430. doi: 10.1002/sim.2712 [published Online First:  
5 414 2006/10/13]
- 6 415 16. Gray RJ. A class of K-sample tests for comparing the cumulative incidence of a competing  
7 416 risk. *The Annals of statistics* 1988:1141-54.
- 8 417 17. Fine JP, Gray RJ. A Proportional Hazards Model for the Subdistribution of a Competing  
9 418 Risk. *Journal of the American Statistical Association* 1999;94(446):496-509. doi:  
10 419 10.1080/01621459.1999.10474144
- 11 420 18. Williamson EJ, Walker AJ, Bhaskaran K, et al. Factors associated with COVID-19-related  
12 421 death using OpenSAFELY. *Nature* 2020;584(7821):430-36. doi: 10.1038/s41586-020-  
13 422 2521-4 [published Online First: 2020/07/09]
- 14 423 19. Tartof SY, Qian L, Hong V, et al. Obesity and Mortality Among Patients Diagnosed With  
15 424 COVID-19: Results From an Integrated Health Care Organization. *Annals of internal*  
16 425 *medicine* 2020;173(10):773-81. doi: 10.7326/m20-3742 [published Online First:  
17 426 2020/08/14]
- 18 427 20. Schoenfeld D. Partial residuals for the proportional hazards regression model. *Biometrika*  
19 428 1982;69(1):239-41.
- 20 429 21. Austin PC, Fine JP. Propensity-score matching with competing risks in survival analysis. *Stat*  
21 430 *Med* 2019;38(5):751-77. doi: 10.1002/sim.8008 [published Online First: 2018/10/23]
- 22 431 22. Zhou B, Latouche A, Rocha V, et al. Competing risks regression for stratified data.  
23 432 *Biometrics* 2011;67(2):661-70. doi: 10.1111/j.1541-0420.2010.01493.x [published  
24 433 Online First: 2010/12/16]
- 25 434 23. Philips K, Uong A, Buckenmyer T, et al. Rapid Implementation of an Adult Coronavirus  
26 435 Disease 2019 Unit in a Children's Hospital. *The Journal of pediatrics* 2020;222:22-27.  
27 436 doi: 10.1016/j.jpeds.2020.04.060 [published Online First: 2020/05/08]
- 28 437 24. New York City Office of the Mayor. News: New York City Office of the Mayor; [Available  
29 438 from: <https://www1.nyc.gov/office-of-the-mayor/news.page> accessed 1/17/2021.
- 30 439 25. Metropolitan Transportation Authority. Fare Data: Metropolitan Transportation Authority;  
31 440 [Available from: <http://web.mta.info/developers/fare.html> accessed 1/17/2021.
- 32 441 26. New York City Department of Health and Mental Hygiene. COVID-19: Data: New York  
33 442 City Department of Health and Mental Hygiene; 2021 [New York City Department of  
34 443 Health and Mental Hygiene:[Available from: <https://www1.nyc.gov/site/doh/covid/covid-19-data.page> accessed 1/17/2021.
- 35 444 27. State of New York. Executive Orders: State of New York; [Available from:  
36 445 <https://www.governor.ny.gov/keywords/executive-order> accessed 1/17/2021.
- 37 446 28. Cavalcanti AB, Zampieri FG, Rosa RG, et al. Hydroxychloroquine with or without  
38 447 Azithromycin in Mild-to-Moderate Covid-19. *The New England journal of medicine*  
39 448 2020;383(21):2041-52. doi: 10.1056/NEJMoa2019014 [published Online First:  
40 449 2020/07/25]
- 41 450 29. Sterne JAC, Murthy S, Diaz JV, et al. Association Between Administration of Systemic  
42 451 Corticosteroids and Mortality Among Critically Ill Patients With COVID-19: A Meta-  
43 452 analysis. *Jama* 2020;324(13):1330-41. doi: 10.1001/jama.2020.17023 [published Online  
44 453 First: 2020/09/03]
- 45 454 30. Carsana L, Sonzogni A, Nasr A, et al. Pulmonary post-mortem findings in a series of  
46 455 COVID-19 cases from northern Italy: a two-centre descriptive study. *The Lancet*  
47 456 *infectious diseases* 2020;20(10):1135-40.  
48 457



- 1  
2  
3 458 31. United States Federal Drug Administration. FDA’s approval of Veklury (remdesivir) for the  
4 459 treatment of COVID-19—The Science of Safety and Effectiveness: United States Federal  
5 460 Drug Administration; [Available from: <https://www.fda.gov/drugs/drug-safety-and-availability/fdas-approval-veklury-remdesivir-treatment-covid-19-science-safety-and-effectiveness>  
6 461 accessed 1/17/2021.  
7 462  
8 463 32. Esler M, Esler D. Can angiotensin receptor-blocking drugs perhaps be harmful in the  
9 464 COVID-19 pandemic? *Journal of hypertension* 2020;38(5):781-82. doi:  
10 465 10.1097/hjh.0000000000002450 [published Online First: 2020/03/21]  
11 466 33. Mancia G, Rea F, Ludergnani M, et al. Renin–Angiotensin–Aldosterone System Blockers  
12 467 and the Risk of Covid-19. *New England Journal of Medicine* 2020;382(25):2431-40. doi:  
13 468 10.1056/NEJMoa2006923  
14 469 34. Zhang P, Zhu L, Cai J, et al. Association of Inpatient Use of Angiotensin-Converting  
15 470 Enzyme Inhibitors and Angiotensin II Receptor Blockers With Mortality Among Patients  
16 471 With Hypertension Hospitalized With COVID-19. *Circulation research*  
17 472 2020;126(12):1671-81. doi: doi:10.1161/CIRCRESAHA.120.317134  
18 473 35. Tan WYT, Young BE, Lye DC, et al. Statin use is associated with lower disease severity in  
19 474 COVID-19 infection. *Scientific Reports* 2020;10(1):17458. doi: 10.1038/s41598-020-  
20 475 74492-0  
21 476 36. Saeed O, Castagna F, Agalliu I, et al. Statin Use and In-Hospital Mortality in Patients With  
22 477 Diabetes Mellitus and COVID-19. *Journal of the American Heart Association*  
23 478 2020;9(24):e018475. doi: doi:10.1161/JAHA.120.018475  
24 479 37. Paul V, Patel S, Royse M, et al. Proning in Non-Intubated (PINI) in Times of COVID-19:  
25 480 Case Series and a Review. *Journal of intensive care medicine* 2020;35(8):818-24. doi:  
26 481 10.1177/0885066620934801 [published Online First: 2020/07/08]  
27 482 38. New York City Department of Health and Mental Hygiene. Health Department Releases  
28 483 Detailed Report on COVID-19 Variants: New York City Department of Health and  
29 484 Mental Hygiene; 2021 [Available from:  
30 485 <https://www1.nyc.gov/site/doh/about/press/pr2021/health-department-releases-detailed-report-on-covid-19-variants.page>  
31 486 accessed 4/21/2021.  
32 487 39. New York City Department of Health and Mental Hygiene. COVID-19: Data - Vaccines:  
33 488 New York City Department of Health and Mental Hygiene; 2021 [Available from:  
34 489 <https://www1.nyc.gov/site/doh/covid/covid-19-data-vaccines.page#dosestrend>  
35 490 accessed  
36 491 12/10/2021.  
37  
38  
39  
40  
41  
42  
43  
44  
45  
46  
47  
48  
49  
50  
51  
52  
53  
54  
55  
56  
57  
58  
59  
60

**Table 1. Demographics, Past Medical History, and Vital Signs of Admitted Patients**

|                                                 | Spring (n=4495)     | Summer (n=264)     | Fall (n=377)       | Winter (n=2254)     |
|-------------------------------------------------|---------------------|--------------------|--------------------|---------------------|
| <b>30-Day hospital outcome</b>                  |                     |                    |                    |                     |
| Still admitted - no (%)                         | 194 (4.3)           | 6 (2.3)            | 15 (4.0)           | 103 (4.6)           |
| Discharged alive - no (%)                       | 3177 (70.7)         | 229 (86.7)         | 336 (89.1)         | 1893 (84.0)         |
| Dead in the hospital - no (%)                   | 1124 (25.0)         | 29 (11.0)          | 26 (6.9)           | 258 (11.4)          |
| <b>Demographics</b>                             |                     |                    |                    |                     |
| Age (IQR) – yr                                  | 66 (55 - 77)        | 66 (50 - 76)       | 63 (50 - 73)       | 67 (56 - 77)        |
| Male sex - no (%)                               | 2377 (52.9)         | 138 (52.3)         | 198 (52.5)         | 1122 (49.8)         |
| Black race and / or Hispanic ethnicity – no (%) | 3345 (74.4)         | 219 (83.0)         | 286 (75.9)         | 1635 (74.2)         |
| Body Mass Index (IQR) - kg/m <sup>2</sup>       | 28.4 (24.6 - 33)    | 27.6 (22.5 - 32.7) | 28.6 (25 - 34.1)   | 28.2 (24.4 - 33.1)  |
| Hospital bed saturation (IQR) - %               | 97.4 (86.5 – 107.6) | 81.7 (76.3 – 85.8) | 87.6 (83.2 - 90.2) | 95.3 (91.9 – 101.8) |
| <b>Past Medical History</b>                     |                     |                    |                    |                     |
| Hypertension - no (%)                           | 3370 (75)           | 197 (74.6)         | 254 (67.4)         | 1713 (76)           |
| Sleep apnea - no (%)                            | 521 (11.6)          | 28 (10.6)          | 47 (12.5)          | 270 (12)            |
| Hyperlipidemia - no (%)                         | 2609 (58)           | 153 (58)           | 199 (52.8)         | 1380 (61.2)         |
| Atrial fibrillation - no (%)                    | 449 (10)            | 30 (11.4)          | 35 (9.3)           | 267 (11.8)          |
| Chronic kidney disease - no (%)                 | 1406 (31.3)         | 70 (26.5)          | 85 (22.5)          | 620 (27.5)          |
| Heart failure - no (%)                          | 980 (21.8)          | 72 (27.3)          | 66 (17.5)          | 519 (23)            |
| Coronary artery disease - no (%)                | 1316 (29.3)         | 95 (36)            | 108 (28.6)         | 721 (32)            |
| Asthma/COPD - no (%)                            | 1371 (30.5)         | 84 (31.8)          | 98 (26)            | 753 (33.4)          |
| Diabetes mellitus - no (%)                      | 2522 (56.1)         | 148 (56.1)         | 187 (49.6)         | 1244 (55.2)         |
| <b>Vitals at Presentation</b>                   |                     |                    |                    |                     |
| Temperature (IQR) - F                           | 98.9 (98.2 - 100)   | 98.4 (97.8 - 98.9) | 98.8 (98.1 - 99.9) | 98.7 (98.1 - 99.8)  |
| SBP (IQR) - mmHg                                | 131 (114 - 148)     | 132 (117 - 149)    | 131 (117 - 147)    | 132 (117 - 148)     |
| DBP (IQR) - mmHg                                | 75 (65 - 84)        | 77 (67 - 87)       | 74 (68 - 84)       | 75 (67 - 84)        |
| HR (IQR) – bpm                                  | 98 (85 - 112)       | 92.5 (76.3 - 105)  | 94 (80 - 107)      | 95 (82 - 107)       |
| Oxygen saturation (IQR) - %                     | 95 (91 - 98)        | 98 (96 - 99)       | 96 (94 - 98)       | 96 (92 - 98)        |
| Respiratory Rate (IQR) - bpm                    | 20 (18 - 22)        | 18 (17 - 20)       | 18 (18 - 20)       | 19 (18 - 22)        |

COPD = Chronic obstructive pulmonary disease; DBP = Diastolic blood pressure; HR = Heart rate; IQR = Interquartile range; SBP = Systolic blood pressure.

**Table 2. Association with In-Hospital Mortality (Regression models with competing risks)**

| Variable                            | Multivariable         |         |
|-------------------------------------|-----------------------|---------|
|                                     | HR (95% CI)           | P-value |
| Age - yr                            | 1.046 (1.04 - 1.051)  | <0.001  |
| Male sex - yes/no                   | 1.352 (1.187 - 1.54)  | <0.001  |
| Body mass index - kg/m <sup>2</sup> | 1.022 (1.012 - 1.032) | <0.001  |
| Temperature - F                     | 1.071 (1.036 - 1.108) | <0.001  |
| SBP - mmHg                          | 0.994 (0.991 - 0.997) | <0.001  |
| DBP - mmHg                          | 0.996 (0.991 - 1.001) | 0.14    |
| HR - bpm                            | 1.003 (0.999 - 1.006) | 0.11    |
| Oxygen saturation - %               | 0.967 (0.961 - 0.972) | <0.001  |
| Respiratory rate - bpm              | 1.027 (1.019 - 1.035) | <0.001  |
| White blood cell count - k/ $\mu$ L | 1.008 (1.001 - 1.016) | 0.02    |
| Glucose - mg/dL                     | 1.001 (1 - 1.001)     | 0.001   |
| Aspartate aminotransferase - U/L    | 1 (1 - 1.001)         | 0.21    |
| Alanine aminotransferase - U/L      | 1 (0.999 - 1)         | 0.25    |
| Lactic acid - mmol/L                | 1.071 (1.036 - 1.107) | <0.001  |
| Platelet count - k/ $\mu$ L         | 0.999 (0.998 - 0.999) | <0.001  |
| Potassium - mEq/L                   | 1.096 (1.028 - 1.168) | 0.0052  |
| Bicarbonates - mEq/L                | 0.957 (0.944 - 0.971) | <0.001  |
| Creatinine - mg/dL                  | 1.023 (0.998 - 1.049) | 0.069   |
| HTN - yes/no                        | 1.008 (0.851 - 1.194) | 0.93    |
| HLD - yes/no                        | 1.196 (1.02 - 1.401)  | 0.027   |
| CKD - yes/no                        | 1.263 (1.09 - 1.462)  | 0.002   |
| HF - yes/no                         | 1.33 (1.146 - 1.543)  | <0.001  |
| COPD/Asthma - yes/no                | 0.948 (0.827 - 1.088) | 0.45    |
| DM - yes/no                         | 0.946 (0.819 - 1.093) | 0.45    |
| CAD - yes/no                        | 1.101 (0.955 - 1.271) | 0.19    |
| Statin use - %                      | 0.577 (0.501 - 0.664) | <0.001  |
| Bed occupancy - %                   | 1.007 (1.001 - 1.013) | 0.004   |

CAD = Coronary artery disease; CKD = Chronic kidney disease; COPD = Chronic obstructive pulmonary disease; DBP = Diastolic blood pressure; DM = Diabetes mellitus; HLD = hyperlipidemia; HF = Heart failure; HR = Heart rate; HTN = Hypertension; SBP = Systolic blood pressure

## Figure Legends

### Figure 1. Simultaneously Admitted Patients

This graph includes the hospitalized patients and the admitted patients in the emergency department waiting for a bed. A precipitous decline of non-COVID-19 admissions begins on March 16, 2020 (vertical gray line) coinciding with gubernatorial health care associated directives in the State of New York. The dotted red line indicates the nominal bed capacity of our institution (1,491 beds).

### Figure 2. Cumulative Monthly Admissions and Mortality

Cumulative monthly admissions (black line, left axis) and mortality (dotted red line, right axis) over the year.

### Figure 3. Change in Therapies

Percent of patients receiving specific therapies over the year.

### Figure 4. Cumulative Incidences

30-day in-hospital mortality by seasons.

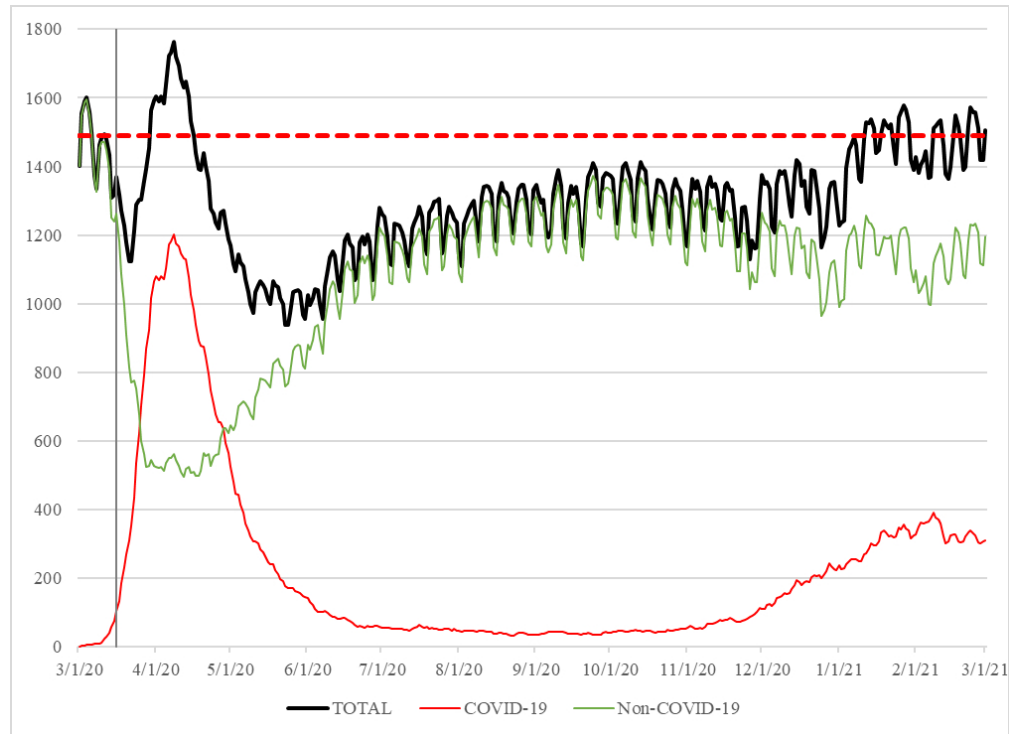

Figure 1. Simultaneously Admitted Patients

This graph includes the hospitalized patients and the admitted patients in the emergency department waiting for a bed. A precipitous decline of non-COVID-19 admissions begins on March 16, 2020 (vertical gray line) coinciding with gubernatorial health care associated directives in the State of New York. The dotted red line indicates the nominal bed capacity of our institution (1,491 beds).

85x62mm (300 x 300 DPI)

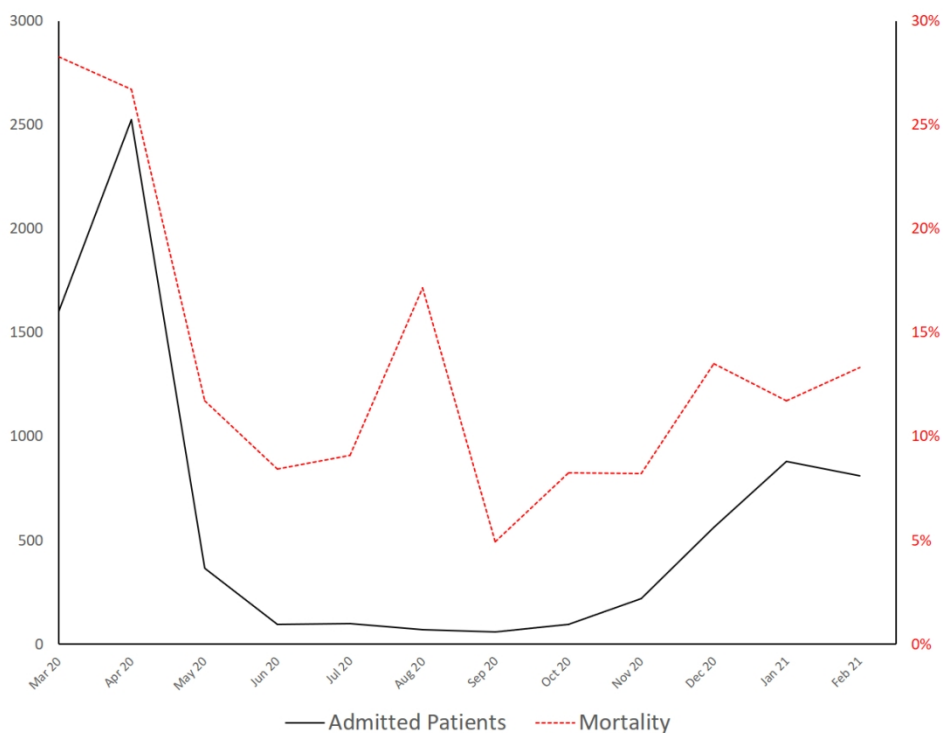

Figure 2. Cumulative Monthly Admissions and Mortality  
 Cumulative monthly admissions (black line, left axis) and mortality (dotted red line, right axis) over the year.

111x87mm (300 x 300 DPI)

1  
2  
3  
4  
5  
6  
7  
8  
9  
10  
11  
12  
13  
14  
15  
16  
17  
18  
19  
20  
21  
22  
23  
24  
25  
26  
27  
28  
29  
30  
31  
32  
33  
34  
35  
36  
37  
38  
39  
40  
41  
42  
43  
44  
45  
46  
47  
48  
49  
50  
51  
52  
53  
54  
55  
56  
57  
58  
59  
60

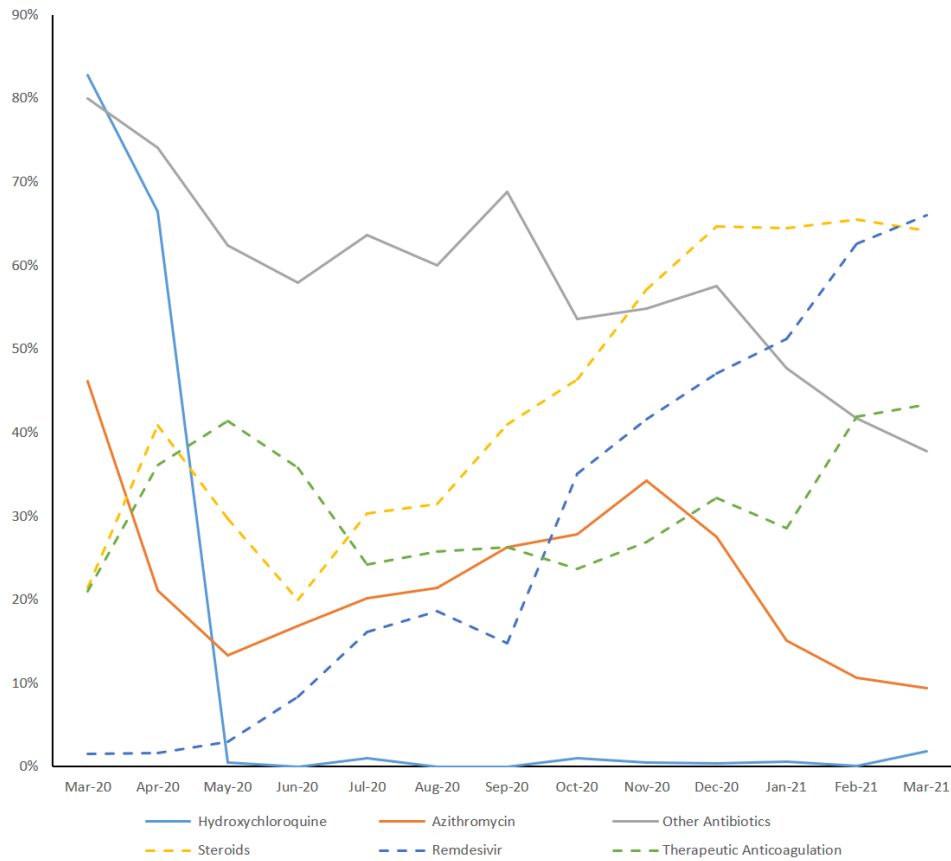

Figure 3. Change in Therapies  
Percent of patients receiving specific therapies over the year.

97x85mm (300 x 300 DPI)

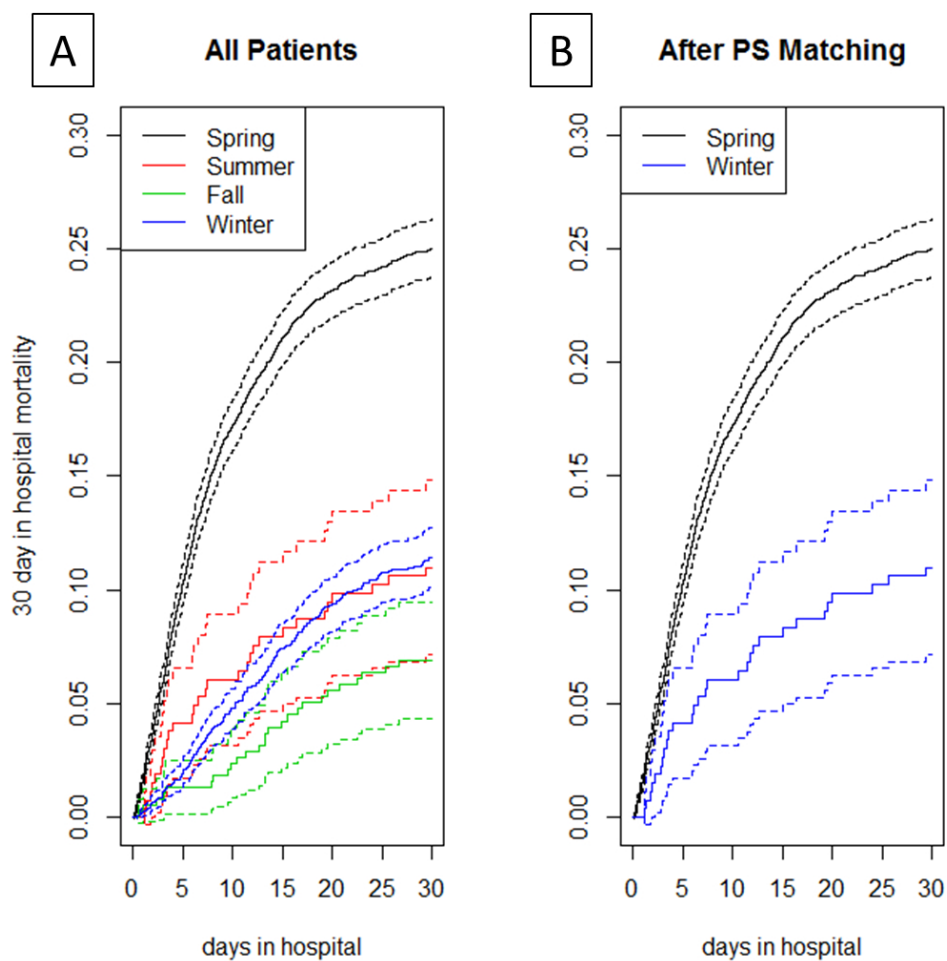

Figure 4. Cumulative Incidences  
 30-day in-hospital mortality by seasons.  
 88x88mm (300 x 300 DPI)



**Supplemental Appendix**

**Table of contents**

1  
2  
3  
4  
5  
6  
7  
8  
9  
10 **Supplemental Table 1 - Comparison Survivors versus Non-survivors..... 2**  
11  
12 **Supplemental Methods ..... 5**  
13 **Supplemental Table 2 - Comparison Spring Vs Winter..... 6**  
14 **Supplemental Table 3 - Initial Laboratory Blood Tests..... 9**  
15 **Supplemental Table 4 - Therapies Administered during the Admission ..... 11**  
16 **Supplemental Figure 1 - Distribution of Propensity Score ..... 12**  
17  
18  
19  
20  
21  
22  
23  
24  
25  
26  
27  
28  
29  
30  
31  
32  
33  
34  
35  
36  
37  
38  
39  
40  
41  
42  
43  
44  
45  
46  
47  
48  
49  
50  
51  
52  
53  
54  
55  
56  
57  
58  
59  
60

**Supplemental Table 1 - Comparison Survivors versus Non-survivors**

|                                                 | Survivors (n=5953) |                     | Non-survivors (n=1437) |                     | p-value |
|-------------------------------------------------|--------------------|---------------------|------------------------|---------------------|---------|
|                                                 | Sample             | Value               | Sample                 | Value               |         |
| <b>Demographics</b>                             |                    |                     |                        |                     |         |
| Age (IQR) - yr                                  | 5953               | 64 (52 - 75)        | 1437                   | 73 (65 - 82)        | <0.001  |
| Male sex - no (%)                               | 5953               | 2989 (50.2)         | 1437                   | 846 (58.9)          | <0.001  |
| Black race and / or Hispanic ethnicity - no (%) | 5953               | 4472 (75.1)         | 1437                   | 1013 (70.5)         | <0.001  |
| Body Mass Index (IQR) - kg/m <sup>2</sup>       | 5679               | 28.4 (24.6 - 33.2)  | 1352                   | 27.9 (23.8 - 32.6)  | <0.001  |
| Hospital bed saturation (IQR) - %               | 5953               | 94.1 (86.5 - 104.8) | 1437                   | 99.3 (87.5 - 107.6) | <0.001  |
| <b>Past Medical History</b>                     |                    |                     |                        |                     |         |
| Hypertension - no (%)                           | 5953               | 4365 (73.3)         | 1437                   | 1169 (81.4)         | <0.001  |
| Sleep apnea - no (%)                            | 5953               | 688 (11.6)          | 1437                   | 178 (12.4)          | 0.38    |
| Hyperlipidemia - no (%)                         | 5953               | 3366 (56.5)         | 1437                   | 975 (67.8)          | <0.001  |
| Atrial fibrillation - no (%)                    | 5953               | 557 (9.4)           | 1437                   | 224 (15.6)          | <0.001  |
| Chronic kidney disease - no (%)                 | 5953               | 1559 (26.2)         | 1437                   | 622 (43.3)          | <0.001  |
| Heart failure - no (%)                          | 5953               | 1181 (19.8)         | 1437                   | 456 (31.7)          | <0.001  |
| Coronary artery disease - no (%)                | 5953               | 1653 (27.8)         | 1437                   | 587 (40.8)          | <0.001  |
| Asthma/COPD - no (%)                            | 5953               | 1842 (30.9)         | 1437                   | 464 (32.3)          | 0.32    |
| Diabetes mellitus - no (%)                      | 5953               | 3168 (53.2)         | 1437                   | 933 (64.9)          | <0.001  |
| <b>Vitals at Presentation</b>                   |                    |                     |                        |                     |         |
| Temperature (IQR) - F                           | 5926               | 99 (98 - 100)       | 1427                   | 99 (98 - 100)       | 0.35    |
| SBP (IQR) - mmHg                                | 5932               | 132 (117 - 148)     | 1430                   | 127 (107 - 146)     | <0.001  |

|    |                                              |      |                    |      |                    |        |
|----|----------------------------------------------|------|--------------------|------|--------------------|--------|
| 1  | DBP (IQR) - mmHg                             | 5926 | 76 (67 - 85)       | 1428 | 71 (60 - 81)       | <0.001 |
| 2  |                                              |      |                    |      |                    |        |
| 3  | HR (IQR) – bpm                               | 5927 | 96 (83 - 110)      | 1429 | 100 (85 - 114)     | <0.001 |
| 4  |                                              |      |                    |      |                    |        |
| 5  | Oxygen saturation (IQR) - %                  | 5922 | 96 (93 - 98)       | 1430 | 92 (84 - 96)       | <0.001 |
| 6  |                                              |      |                    |      |                    |        |
| 7  | Respiratory Rate (IQR) - bpm                 | 5928 | 19 (18 - 21)       | 1428 | 22 (19 - 26)       | <0.001 |
| 8  |                                              |      |                    |      |                    |        |
| 9  |                                              |      |                    |      |                    |        |
| 10 | <b>Laboratory Markers</b>                    |      |                    |      |                    |        |
| 11 |                                              |      |                    |      |                    |        |
| 12 | Hemoglobin (IQR) - g/dL                      | 5823 | 12.9 (11.4 - 14.1) | 1408 | 12.6 (10.9 - 14.2) | 0.006  |
| 13 |                                              |      |                    |      |                    |        |
| 14 | Platelet count (IQR) -k/ $\mu$ L             | 5825 | 198 (137 - 264)    | 1408 | 172 (88 - 246)     | <0.001 |
| 15 |                                              |      |                    |      |                    |        |
| 16 | White blood cell count (IQR) - k/ $\mu$ L    | 5823 | 6.9 (5.1 - 9.5)    | 1408 | 8.3 (6.0 - 11.9)   | <0.001 |
| 17 |                                              |      |                    |      |                    |        |
| 18 | Absolute lymphocyte count (IQR) - k/ $\mu$ L | 5880 | 1.1 (0.7 - 1.5)    | 1423 | 0.9 (0.6 - 1.2)    | <0.001 |
| 19 |                                              |      |                    |      |                    |        |
| 20 | Sodium (IQR) – mEq/L                         | 5879 | 137 (134 - 140)    | 1428 | 138 (134 - 143)    | <0.001 |
| 21 |                                              |      |                    |      |                    |        |
| 22 | Potassium (IQR) – mEq/L                      | 5845 | 4.2 (3.8 - 4.6)    | 1426 | 4.4 (4.0 – 5.0)    | <0.001 |
| 23 |                                              |      |                    |      |                    |        |
| 24 | Chloride (IQR) – mEq/L                       | 5864 | 100 (96 - 103)     | 1423 | 100 (95 - 104)     | 0.28   |
| 25 |                                              |      |                    |      |                    |        |
| 26 | Bicarbonates (IQR) – mEq/L                   | 5879 | 24 (21 - 27)       | 1428 | 22 (18 - 25)       | <0.001 |
| 27 |                                              |      |                    |      |                    |        |
| 28 | Creatinine (IQR) - mg/dL                     | 5876 | 1.0 (0.8 - 1.5)    | 1427 | 1.6 (1 - 2.9)      | <0.001 |
| 29 |                                              |      |                    |      |                    |        |
| 30 | Glucose (IQR) - mg/dL                        | 5879 | 126 (104 - 179)    | 1428 | 156 (121 - 236)    | <0.001 |
| 31 |                                              |      |                    |      |                    |        |
| 32 | Aspartate aminotransferase (IQR) - U/L       | 5416 | 35 (24 - 55)       | 1312 | 52 (33 - 81)       | <0.001 |
| 33 |                                              |      |                    |      |                    |        |
| 34 | Alanine aminotransferase (IQR) - U/L         | 5614 | 26 (16 - 42)       | 1376 | 28 (18 - 46)       | <0.001 |
| 35 |                                              |      |                    |      |                    |        |
| 36 | Lactic acid (IQR) – mmol/L                   | 5097 | 1.9 (1.4 - 2.6)    | 1347 | 2.6 (1.8 - 3.9)    | <0.001 |
| 37 |                                              |      |                    |      |                    |        |
| 38 | Lactate dehydrogenase (IQR) - mmol/L         | 4017 | 384 $\pm$ 219      | 926  | 518 (371 - 706)    | <0.001 |
| 39 |                                              |      |                    |      |                    |        |
| 40 | Creatine Kinase (IQR) – U/L                  | 4714 | 336 (253 - 454)    | 1218 | 777 $\pm$ 2657     | <0.001 |
| 41 |                                              |      |                    |      |                    |        |
| 42 | D-dimer (IQR) - $\mu$ g/mL                   | 3850 | 1.2 (0.7 - 2.5)    | 763  | 2.5 (1.3 - 6.9)    | <0.001 |
| 43 |                                              |      |                    |      |                    |        |
| 44 | Procalcitonin (IQR) – ng/mL                  | 2800 | 0.1 (0.1 - 0.3)    | 615  | 0.6 (0.2 - 2.4)    | <0.001 |
| 45 |                                              |      |                    |      |                    |        |
| 46 | Troponin T* (IQR) - ng/mL                    | 2365 | 0.01 (0.01 - 0.03) | 302  | 0.03 (0.01 - 0.1)  | <0.001 |
| 47 |                                              |      |                    |      |                    |        |
| 48 | Troponin I* (IQR) – ng/mL                    | 2684 | 0.01 (0.01 – 0.02) | 981  | 0.02 (0.01 - 0.08) | <0.001 |
| 49 |                                              |      |                    |      |                    |        |
| 50 |                                              |      |                    |      |                    |        |
| 51 |                                              |      |                    |      |                    |        |
| 52 |                                              |      |                    |      |                    |        |
| 53 |                                              |      |                    |      |                    |        |
| 54 |                                              |      |                    |      |                    |        |
| 55 |                                              |      |                    |      |                    |        |
| 56 |                                              |      |                    |      |                    |        |
| 57 |                                              |      |                    |      |                    |        |
| 58 |                                              |      |                    |      |                    |        |
| 59 |                                              |      |                    |      |                    |        |
| 60 |                                              |      |                    |      |                    |        |

|   |                             |      |                  |     |                   |        |
|---|-----------------------------|------|------------------|-----|-------------------|--------|
| 1 | Interleukin-6 (IQR) – pg/mL | 1752 | 17 (6 - 40)      | 287 | 68 (26- 154)      | <0.001 |
| 2 |                             |      |                  |     |                   |        |
| 3 | Fibrinogen (IQR) – mg/dL    | 2478 | 570 (448 - 690)  | 460 | 621 (506 - 761)   | <0.001 |
| 4 |                             |      |                  |     |                   |        |
| 5 | Ferritin (IQR) – ng/mL      | 3395 | 521 (224 - 1112) | 659 | 1021 (514 - 2161) | <0.001 |
| 6 |                             |      |                  |     |                   |        |

7 COPD = Chronic obstructive pulmonary disease; DBP = Diastolic blood pressure; HR = Heart rate; IQR =  
8 Interquartile range; SBP = Systolic blood pressure. \* Troponin T was available only until June 2020, Troponin I  
9 was available only after June 2020.  
10  
11  
12  
13  
14  
15  
16  
17  
18  
19  
20  
21  
22  
23  
24  
25  
26  
27  
28  
29  
30  
31  
32  
33  
34  
35  
36  
37  
38  
39  
40  
41  
42  
43  
44  
45  
46  
47  
48  
49  
50  
51  
52  
53  
54  
55  
56  
57  
58  
59  
60

## Supplemental Methods

### *Covariate Selection Method for Multivariable Competing Risk Proportional Hazard Models for in-hospital Death between Patients Spring and Winter Patients*

The covariates in the multivariable analyses included factors present in > 90% of our dataset, are known to be associated with in-hospital COVID-19 mortality based on prior literature or with a univariate association between admission season (exposure) or in-hospital mortality (outcome) ( $p < 0.05$ ) and a clinical (relative difference >5%) difference between the spring and winter patients (**Supplemental Table 2**). These variables included: age, sex, BMI, vital signs at presentation, white cell count, creatinine, glucose, alanine transaminase, history of hypertension, dyslipidemia, chronic kidney disease (CKD), heart failure, coronary artery disease, asthma/chronic obstructive pulmonary disease, diabetes mellitus and statin use. Also in this model, lactic acid level and percent of hospital bed saturation were forced into the model as marker of illness severity and level of hospital stress, respectively.

**Supplemental Table 2 - Comparison Spring Vs Winter**

|                                                 | Spring (n=4495) |                     | Winter (n=2254) |                     | P-value |
|-------------------------------------------------|-----------------|---------------------|-----------------|---------------------|---------|
|                                                 | Sample          | Value               | Sample          | Value               |         |
| <b>Demographics</b>                             |                 |                     |                 |                     |         |
| Age (IQR) - yr                                  | 4495            | 66 (55 - 77)        | 2254            | 67 (56 - 77)        | 0.051   |
| Male sex - no (%)                               | 4495            | 2377 (52.9)         | 2254            | 1122 (49.8)         | 0.016   |
| Black race and / or Hispanic ethnicity - no (%) | 4495            | 3345 (74.4)         | 2254            | 1635 (72.5)         | 0.098   |
| Body Mass Index (IQR) - kg/m <sup>2</sup>       | 4229            | 28.4 (24.6 - 33)    | 2194            | 28.2 (24.4 - 33.1)  | 0.433   |
| Hospital bed saturation (IQR) - %               | 4495            | 97.4 (86.5 - 107.6) | 2254            | 95.3 (91.9 - 101.8) | <0.001  |
| <b>Past Medical History</b>                     |                 |                     |                 |                     |         |
| Hypertension - no (%)                           | 4495            | 3370 (75)           | 2254            | 1713 (76)           | 0.357   |
| Sleep apnea - no (%)                            | 4495            | 521 (11.6)          | 2254            | 270 (12)            | 0.640   |
| Hyperlipidemia - no (%)                         | 4495            | 2609 (58)           | 2254            | 1380 (61.2)         | 0.012   |
| Atrial fibrillation - no (%)                    | 4495            | 449 (10)            | 2254            | 267 (11.8)          | 0.019   |
| Chronic kidney disease - no (%)                 | 4495            | 1406 (31.3)         | 2254            | 620 (27.5)          | 0.001   |
| Heart failure - no (%)                          | 4495            | 980 (21.8)          | 2254            | 519 (23)            | 0.254   |
| Coronary artery disease - no (%)                | 4495            | 1316 (29.3)         | 2254            | 721 (32)            | 0.022   |
| Asthma/COPD - no (%)                            | 4495            | 1371 (30.5)         | 2254            | 753 (33.4)          | 0.015   |
| Diabetes mellitus - no (%)                      | 4495            | 2522 (56.1)         | 2254            | 1244 (55.2)         | 0.475   |
| <b>Vitals at Presentation</b>                   |                 |                     |                 |                     |         |
| Temperature (IQR) - F                           | 4463            | 98.9 (98.2 - 100)   | 2254            | 98.7 (98.1 - 99.8)  | <0.001  |
| SBP (IQR) - mmHg                                | 4469            | 131 (114 - 148)     | 2254            | 132 (117 - 148)     | 0.002   |
| DBP (IQR) - mmHg                                | 4465            | 75 (65 - 84)        | 2252            | 75 (67 - 84)        | 0.117   |
| HR (IQR) - bpm                                  | 4467            | 98 (85 - 112)       | 2253            | 95 (82 - 107)       | <0.001  |

|    |                                              |      |                    |      |                    |        |
|----|----------------------------------------------|------|--------------------|------|--------------------|--------|
| 1  | Oxygen saturation (IQR) - %                  | 4463 | 95 (91 - 98)       | 2253 | 96 (92 - 98)       | <0.001 |
| 2  |                                              |      |                    |      |                    |        |
| 3  | Respiratory Rate (IQR) - bpm                 | 4466 | 20 (18 - 22)       | 2254 | 19 (18 - 22)       | <0.001 |
| 4  |                                              |      |                    |      |                    |        |
| 5  | <b>Laboratory Markers</b>                    |      |                    |      |                    |        |
| 6  |                                              |      |                    |      |                    |        |
| 7  |                                              |      |                    |      |                    |        |
| 8  | Hemoglobin (IQR) - g/dL                      | 4372 | 12.8 (11.2 - 14.1) | 2228 | 12.9 (11.5 - 14.2) | 0.030  |
| 9  |                                              |      |                    |      |                    |        |
| 10 | Platelet count (IQR) -k/ $\mu$ L             | 4372 | 188 (116 - 260)    | 2228 | 196 (143 - 259)    | <0.001 |
| 11 |                                              |      |                    |      |                    |        |
| 12 | White blood cell count (IQR) - k/ $\mu$ L    | 4372 | 7.5 (5.6 - 10.6)   | 2228 | 6.4 (4.7 - 8.8)    | <0.001 |
| 13 |                                              |      |                    |      |                    |        |
| 14 | Absolute lymphocyte count (IQR) - k/ $\mu$ L | 4420 | 1 (0.7 - 1.4)      | 2246 | 1 (0.7 - 1.4)      | 0.062  |
| 15 |                                              |      |                    |      |                    |        |
| 16 | Sodium (IQR) – mEq/L                         | 4414 | 137 (134 - 141)    | 2253 | 137 (134 - 140)    | <0.001 |
| 17 |                                              |      |                    |      |                    |        |
| 18 | Potassium (IQR) – mEq/L                      | 4389 | 4.3 (3.9 - 4.8)    | 2243 | 4.1 (3.8 - 4.5)    | <0.001 |
| 19 |                                              |      |                    |      |                    |        |
| 20 | Chloride (IQR) – mEq/L                       | 4394 | 98 (95 - 103)      | 2253 | 101 (98 - 104)     | <0.001 |
| 21 |                                              |      |                    |      |                    |        |
| 22 | Bicarbonates (IQR) – mEq/L                   | 4414 | 24 (20 - 26)       | 2253 | 24 (21 - 27)       | <0.001 |
| 23 |                                              |      |                    |      |                    |        |
| 24 | Creatinine (IQR) - mg/dL                     | 4410 | 1.1 (0.8 - 2)      | 2253 | 1.1 (0.8 - 1.5)    | <0.001 |
| 25 |                                              |      |                    |      |                    |        |
| 26 | Glucose (IQR) - mg/dL                        | 4414 | 134 (108 - 197)    | 2253 | 126 (104 - 184)    | <0.001 |
| 27 |                                              |      |                    |      |                    |        |
| 28 | Aspartate aminotransferase (IQR) - U/L       | 4045 | 40 (27 - 65)       | 2084 | 35 (24 - 55)       | <0.001 |
| 29 |                                              |      |                    |      |                    |        |
| 30 | Alanine aminotransferase (IQR) - U/L         | 4206 | 27 (17 - 44)       | 2171 | 26 (17 - 44)       | 0.292  |
| 31 |                                              |      |                    |      |                    |        |
| 32 | Lactic acid (IQR) – mmol/L                   | 3981 | 2.1 (1.6 - 3)      | 1913 | 1.9 (1.4 - 2.5)    | <0.001 |
| 33 |                                              |      |                    |      |                    |        |
| 34 | Lactate dehydrogenase (IQR) - mmol/L         | 2935 | 384 (285 - 535)    | 1563 | 341 (254 - 468)    | <0.001 |
| 35 |                                              |      |                    |      |                    |        |
| 36 | Creatine Kinase (IQR) – U/L                  | 3453 | 168 (83 - 401)     | 1957 | 126 (67 - 282)     | <0.001 |
| 37 |                                              |      |                    |      |                    |        |
| 38 | D-dimer (IQR) - $\mu$ g/mL                   | 2204 | 1.8 (0.9 - 3.9)    | 1907 | 1.2 (0.7 - 2.3)    | <0.001 |
| 39 |                                              |      |                    |      |                    |        |
| 40 | Procalcitonin (IQR) – ng/mL                  | 1789 | 0.2 (0.1 - 0.9)    | 1252 | 0.1 (0.1 - 0.3)    | <0.001 |
| 41 |                                              |      |                    |      |                    |        |
| 42 | Troponin T* (IQR) - ng/mL                    | 0    | NA                 | 2106 | 0.01 (0.01 - 0.03) | NA     |
| 43 |                                              |      |                    |      |                    |        |
| 44 | Troponin I* (IQR) – ng/mL                    | 3662 | 0.01 (0.01 - 0.03) | 0    | NA                 | NA     |
| 45 |                                              |      |                    |      |                    |        |
| 46 | Interleukin-6 (IQR) – pg/mL                  | 1056 | 34 (14 - 75)       | 710  | 11 (4 - 26)        | <0.001 |
| 47 |                                              |      |                    |      |                    |        |
| 48 | Fibrinogen (IQR) – mg/dL                     | 1552 | 624 (491 - 750)    | 1040 | 536 (434 - 652)    | <0.001 |
| 49 |                                              |      |                    |      |                    |        |
| 50 |                                              |      |                    |      |                    |        |
| 51 |                                              |      |                    |      |                    |        |
| 52 |                                              |      |                    |      |                    |        |
| 53 |                                              |      |                    |      |                    |        |
| 54 |                                              |      |                    |      |                    |        |
| 55 |                                              |      |                    |      |                    |        |
| 56 |                                              |      |                    |      |                    |        |
| 57 |                                              |      |                    |      |                    |        |
| 58 |                                              |      |                    |      |                    |        |
| 59 |                                              |      |                    |      |                    |        |
| 60 |                                              |      |                    |      |                    |        |

|                        |      |                  |      |                  |        |
|------------------------|------|------------------|------|------------------|--------|
| Ferritin (IQR) – ng/mL | 1969 | 716 (335 - 1498) | 1637 | 510 (230 - 1094) | <0.001 |
|------------------------|------|------------------|------|------------------|--------|

COPD = Chronic obstructive pulmonary disease; DBP = Diastolic blood pressure; HR = Heart rate; IQR = Interquartile range; SBP = Systolic blood pressure. \* Troponin T was available only until June 2020, Troponin I was available only after June 2020.

For peer review only



**Supplemental Table 3 - Initial Laboratory Blood Tests**

|                                              | <b>Spring (n=4495)</b> | <b>Summer (n=264)</b> | <b>Fall (n=377)</b> | <b>Winter (n=2254)</b> |
|----------------------------------------------|------------------------|-----------------------|---------------------|------------------------|
| Hemoglobin (IQR) - g/dL                      | 12.8 (11.2 - 14.1)     | 12.4 (10.7 - 13.9)    | 13 (11.6 - 14.3)    | 12.9 (11.5 - 14.2)     |
| Platelet count (IQR) - k/ $\mu$ L            | 188 (116 - 260)        | 228 (169 - 300)       | 200 (144 - 257)     | 196 (143 - 259)        |
| White blood cell count (IQR) - k/ $\mu$ L    | 7.5 (5.6 - 10.6)       | 8 (5.8 - 11)          | 6.6 (5.1 - 8.9)     | 6.4 (4.7 - 8.8)        |
| Absolute lymphocyte count (IQR) - k/ $\mu$ L | 1 (0.7 - 1.4)          | 1.2 (0.9 - 1.8)       | 1.1 (0.8 - 1.5)     | 1 (0.7 - 1.4)          |
| Sodium (IQR) - mEq/L                         | 137 (134 - 141)        | 138 (135 - 141)       | 137 (135 - 140)     | 137 (134 - 140)        |
| Potassium (IQR) - mEq/L                      | 4.3 (3.9 - 4.8)        | 4.2 (3.8 - 4.6)       | 4 (3.8 - 4.4)       | 4.1 (3.8 - 4.5)        |
| Chloride (IQR) - mEq/L                       | 98 (95 - 103)          | 103 (100 - 105)       | 101 (99 - 104)      | 101 (98 - 104)         |
| Bicarbonates (IQR) - mEq/L                   | 24 (20 - 26)           | 24 (21 - 27)          | 25 (22 - 27)        | 24 (21 - 27)           |
| Creatinine (IQR) - mg/dL                     | 1.1 (0.8 - 2)          | 1 (0.8 - 1.5)         | 1 (0.8 - 1.3)       | 1.1 (0.8 - 1.5)        |
| Glucose (IQR) - mg/dL                        | 134 (108 - 197)        | 121 (100 - 171)       | 122 (102 - 173)     | 126 (104 - 184)        |
| Aspartate aminotransferase (IQR) - U/L       | 40 (27 - 65)           | 26 (20 - 38)          | 31 (21 - 47)        | 35 (24 - 55)           |
| Alanine aminotransferase (IQR) - U/L         | 27 (17 - 44)           | 21 (14 - 32)          | 25 (16 - 41)        | 26 (17 - 44)           |
| Lactic acid (IQR) - mmol/L                   | 2.1 (1.6 - 3)          | 1.9 (1.4 - 2.7)       | 1.8 (1.3 - 2.5)     | 1.9 (1.4 - 2.5)        |
| Lactate dehydrogenase (IQR) - mmol/L         | 384 (285 - 535)        | 254.5 (196 - 340)     | 300 (225 - 383)     | 341 (254 - 468)        |
| Creatine Kinase (IQR) - U/L                  | 168 (83 - 401)         | 97 (57 - 176)         | 116 (60 - 213)      | 126 (67 - 282)         |
| D-dimer (IQR) - $\mu$ g/mL                   | 1.8 (0.9 - 3.9)        | 1.1 (0.5 - 2.2)       | 0.8 (0.5 - 1.6)     | 1.2 (0.7 - 2.3)        |
| Procalcitonin (IQR) - ng/mL                  | 0.2 (0.1 - 0.9)        | 0.1 (0.1 - 0.4)       | 0.1 (0.1 - 0.2)     | 0.1 (0.1 - 0.3)        |
| Troponin T* (IQR) - ng/mL                    | NA                     | 0.01 (0.01 - 0.03)    | 0.01 (0.01 - 0.02)  | 0.01 (0.01 - 0.03)     |
| Troponin I* (IQR) - ng/mL                    | 0.01 (0.01 - 0.03)     | 0.01 (0.01 - 0.01)    | NA                  | NA                     |
| Interleukin-6 (IQR) - pg/mL                  | 33.6 (13.8 - 75.2)     | 11.7 (3 - 43.1)       | 11 (4.7 - 22.2)     | 10.8 (4.3 - 25.6)      |
| Fibrinogen (IQR) - mg/dL                     | 624 (491 - 750)        | 448 (370 - 583)       | 540 (436 - 663)     | 535.5 (434 - 652)      |

|   |                        |                  |                |                 |                  |
|---|------------------------|------------------|----------------|-----------------|------------------|
| 1 | Ferritin (IQR) – ng/mL | 716 (335 - 1498) | 228 (90 - 562) | 364 (166 - 785) | 510 (230 - 1094) |
|---|------------------------|------------------|----------------|-----------------|------------------|

2  
3  
4  
5 IQR = Interquartile range. \* Troponin T was available only until June 2020, Troponin I was available only after  
6 June 2020  
7  
8  
9  
10  
11  
12  
13  
14  
15  
16  
17  
18  
19  
20  
21  
22  
23  
24  
25  
26  
27  
28  
29  
30  
31  
32  
33  
34  
35  
36  
37  
38  
39  
40  
41  
42  
43  
44  
45  
46  
47  
48  
49  
50  
51  
52  
53  
54  
55  
56  
57  
58  
59  
60

For peer review only

**Supplemental Table 4 - Therapies Administered during the Admission**

|                                                          | <b>Spring</b><br><b>(n=4495)</b> | <b>Summer</b><br><b>(n=264)</b> | <b>Fall</b><br><b>(n=377)</b> | <b>Winter</b><br><b>(n=2254)</b> |
|----------------------------------------------------------|----------------------------------|---------------------------------|-------------------------------|----------------------------------|
| <b>Hydroxychloroquine - no (%)</b>                       | 3007 (66.9)                      | 1 (0.4)                         | 2 (0.5)                       | 8 (0.4)                          |
| <b>Azithromycin - no (%)</b>                             | 1322 (29.4)                      | 51 (19.3)                       | 118 (31.3)                    | 374 (16.6)                       |
| <b>Other antibiotics - no (%)</b>                        | 3382 (75.2)                      | 160 (60.6)                      | 214 (56.8)                    | 1082 (48)                        |
| <b>Steroids - no (%)</b>                                 | 1485 (33)                        | 71 (26.9)                       | 195 (51.7)                    | 1462 (64.9)                      |
| <b>Angiotensin-converting-enzyme Inhibitors - no (%)</b> | 318 (7.1)                        | 36 (13.6)                       | 51 (13.5)                     | 269 (11.9)                       |
| <b>Angiotensin II receptor blockers - no (%)</b>         | 264 (5.9)                        | 23 (8.7)                        | 32 (8.5)                      | 212 (9.4)                        |
| <b>Statin - no (%)</b>                                   | 1478 (32.9)                      | 109 (41.3)                      | 129 (34.2)                    | 1002 (44.5)                      |
| <b>Therapeutic anticoagulation - no (%)</b>              | 1041/4496<br>(31.2)              | 76 (28.8)                       | 98 (26.0)                     | 772 (34.3)                       |
| <b>Remdesivir* - no (%)</b>                              | 78 (1.7)                         | 37 (14)                         | 134 (35.5)                    | 1224 (54.3)                      |
| <b>Lopinavir/Ritonavir – no (%)</b>                      | 40 (0.9)                         | 0 (0)                           | 0 (0)                         | 0 (0)                            |
| <b>Ivermectin – no (%)</b>                               | 11 (0.2)                         | 1 (0.4)                         | 0 (0)                         | 34 (1.5)                         |

\* 45 patients listed as remdesivir recipients in the spring season were part of a 1:1 double-blind, placebo-controlled study. Instead, all the patients in summer, fall, and winter seasons listed as remdesivir recipients received the actual medication.

Supplemental Figure 1 - Distribution of Propensity Score

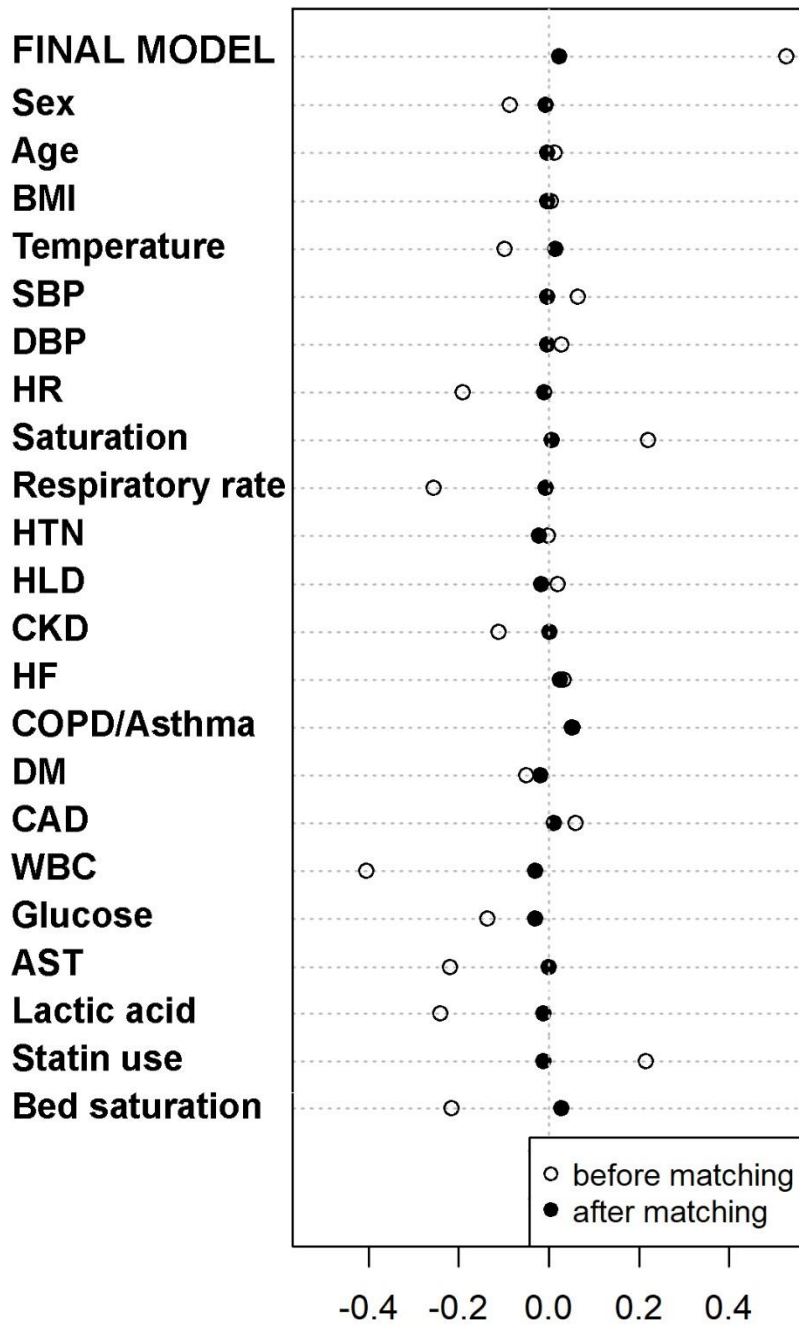

AST = aspartate transaminase; BMI= body mass index; CAD= coronary artery disease; COPD = chronic obstructive pulmonary disease; CKD = chronic kidney disease; DBP= diastolic blood pressure; DM = Diabetes mellitus; HF= heart failure; HLD = hyperlipidemia; HNT = hypertension; HR = heart rate; SBP = systolic blood pressure; WBC = white blood cell count

STROBE Statement—Checklist of items that should be included in reports of *cohort studies*

|                              | Item No | Recommendation                                                                                                                                                                                                                                                                                                         | Page No         |
|------------------------------|---------|------------------------------------------------------------------------------------------------------------------------------------------------------------------------------------------------------------------------------------------------------------------------------------------------------------------------|-----------------|
| <b>Title and abstract</b>    | 1       | (a) Indicate the study's design with a commonly used term in the title or the abstract                                                                                                                                                                                                                                 | 1               |
|                              |         | (b) Provide in the abstract an informative and balanced summary of what was done and what was found                                                                                                                                                                                                                    | 2               |
| <b>Introduction</b>          |         |                                                                                                                                                                                                                                                                                                                        |                 |
| Background/rationale         | 2       | Explain the scientific background and rationale for the investigation being reported                                                                                                                                                                                                                                   | 4               |
| Objectives                   | 3       | State specific objectives, including any prespecified hypotheses                                                                                                                                                                                                                                                       | 4               |
| <b>Methods</b>               |         |                                                                                                                                                                                                                                                                                                                        |                 |
| Study design                 | 4       | Present key elements of study design early in the paper                                                                                                                                                                                                                                                                | 4-5             |
| Setting                      | 5       | Describe the setting, locations, and relevant dates, including periods of recruitment, exposure, follow-up, and data collection                                                                                                                                                                                        | 4-5             |
| Participants                 | 6       | (a) Give the eligibility criteria, and the sources and methods of selection of participants. Describe methods of follow-up<br>(b) For matched studies, give matching criteria and number of exposed and unexposed                                                                                                      | 4-5             |
| Variables                    | 7       | Clearly define all outcomes, exposures, predictors, potential confounders, and effect modifiers. Give diagnostic criteria, if applicable                                                                                                                                                                               | 5<br>Supp       |
| Data sources/<br>measurement | 8*      | For each variable of interest, give sources of data and details of methods of assessment (measurement). Describe comparability of assessment methods if there is more than one group                                                                                                                                   | 4-5             |
| Bias                         | 9       | Describe any efforts to address potential sources of bias                                                                                                                                                                                                                                                              | 12-<br>13       |
| Study size                   | 10      | Explain how the study size was arrived at                                                                                                                                                                                                                                                                              | 4-5             |
| Quantitative variables       | 11      | Explain how quantitative variables were handled in the analyses. If applicable, describe which groupings were chosen and why                                                                                                                                                                                           | 4-5             |
| Statistical methods          | 12      | (a) Describe all statistical methods, including those used to control for confounding<br>(b) Describe any methods used to examine subgroups and interactions<br>(c) Explain how missing data were addressed<br>(d) If applicable, explain how loss to follow-up was addressed<br>(e) Describe any sensitivity analyses | 5-6<br><br>Supp |
| <b>Results</b>               |         |                                                                                                                                                                                                                                                                                                                        |                 |
| Participants                 | 13*     | (a) Report numbers of individuals at each stage of study—eg numbers potentially eligible, examined for eligibility, confirmed eligible, included in the study, completing follow-up, and analysed<br>(b) Give reasons for non-participation at each stage<br>(c) Consider use of a flow diagram                        | 6-7             |
| Descriptive data             | 14*     | (a) Give characteristics of study participants (eg demographic, clinical, social) and information on exposures and potential confounders<br>(b) Indicate number of participants with missing data for each variable of interest<br>(c) Summarise follow-up time (eg, average and total amount)                         | 6-9             |
| Outcome data                 | 15*     | Report numbers of outcome events or summary measures over time                                                                                                                                                                                                                                                         | 8-9             |

|    |                          |    |                                                                                                                                                                                                              |       |
|----|--------------------------|----|--------------------------------------------------------------------------------------------------------------------------------------------------------------------------------------------------------------|-------|
| 1  | Main results             | 16 | (a) Give unadjusted estimates and, if applicable, confounder-adjusted estimates and their precision (eg, 95% confidence interval). Make clear which confounders were adjusted for and why they were included | 6-9   |
| 2  |                          |    | (b) Report category boundaries when continuous variables were categorized                                                                                                                                    |       |
| 3  |                          |    | (c) If relevant, consider translating estimates of relative risk into absolute risk for a meaningful time period                                                                                             |       |
| 4  | Other analyses           | 17 | Report other analyses done—eg analyses of subgroups and interactions, and sensitivity analyses                                                                                                               | 9     |
| 5  | <b>Discussion</b>        |    |                                                                                                                                                                                                              |       |
| 6  | Key results              | 18 | Summarise key results with reference to study objectives                                                                                                                                                     | 9     |
| 7  | Limitations              | 19 | Discuss limitations of the study, taking into account sources of potential bias or imprecision. Discuss both direction and magnitude of any potential bias                                                   | 12-13 |
| 8  | Interpretation           | 20 | Give a cautious overall interpretation of results considering objectives, limitations, multiplicity of analyses, results from similar studies, and other relevant evidence                                   | 9-11  |
| 9  | Generalisability         | 21 | Discuss the generalisability (external validity) of the study results                                                                                                                                        | 14    |
| 10 | <b>Other information</b> |    |                                                                                                                                                                                                              |       |
| 11 | Funding                  | 22 | Give the source of funding and the role of the funders for the present study and, if applicable, for the original study on which the present article is based                                                | 15    |

\*Give information separately for exposed and unexposed groups.

**Note:** An Explanation and Elaboration article discusses each checklist item and gives methodological background and published examples of transparent reporting. The STROBE checklist is best used in conjunction with this article (freely available on the Web sites of PLoS Medicine at <http://www.plosmedicine.org/>, Annals of Internal Medicine at <http://www.annals.org/>, and Epidemiology at <http://www.epidem.com/>). Information on the STROBE Initiative is available at <http://www.strobe-statement.org>.
